# Supplementary material for: Systematic identification of interchromosomal interaction networks supports the existence of specialized RNA factories
Source: HighWire-hosted journal article supplement (doi:10.1101/gr.278327.123), 2024-09-25
Supplement: Supplemental_Table_S1.xlsx [file Supplemental_Table_S1.xlsx]

## Sheet: Table S1
Supplementary Table 1: Greek islands-based clique (top 200)
mOSN						HBC
Chromosome	start	end	Visitational Frequency	Known Greek island		Chromosome	start	end	Visitational Frequency	Known Greek island
chr6	42500000	42750000	0.100125	Yes		chr6	42500000	42750000	0.108469	Yes
chr4	58750000	59000000	0.100108	Yes		chr4	58750000	59000000	0.100559	Yes
chr3	106750000	107000000	0.100104	Yes		chr3	106750000	107000000	0.0950971	Yes
chr19	12750000	13000000	0.100101	Yes		chr19	12750000	13000000	0.089052	Yes
chr9	19500000	19750000	0.100101	Yes		chr9	19500000	19750000	0.0867334	Yes
chr9	37750000	38000000	0.00036631			chr1	26800000	26900000	0.00041232
chr7	108500000	108750000	0.00035952			chr9	3800000	3900000	0.00036441
chr2	90250000	90500000	0.00033863	Yes		chr5	68000000	68100000	0.00033669
chr1	174000000	174250000	0.00029624	Yes		chr15	86500000	86600000	0.00033052
chr19	13000000	13250000	0.0002961			chr18	62000000	62100000	0.00030493
chr11	74000000	74250000	0.00029251	Yes		chr5	101300000	101400000	0.00030421
chr19	12500000	12750000	0.00028933			chr12	103900000	104000000	0.00029865
chr9	19250000	19500000	0.00028667			chr17	93600000	93700000	0.00029379
chr19	12250000	12500000	0.00028091			chr7	53700000	53800000	0.00028966
chr4	118750000	119000000	0.00027863			chr7	131600000	131700000	0.00028964
chr9	37500000	37750000	0.00027436	Yes		chr7	131100000	131200000	0.00028157
chr7	108750000	109000000	0.00027373	Yes		chr7	130900000	131000000	0.00027935
chr2	37000000	37250000	0.00027372	Yes		chr14	124600000	124700000	0.00027644
chr16	3750000	4000000	0.00026928	Yes		chr18	29100000	29200000	0.00027184
chr11	58500000	58750000	0.00026818	Yes		chr8	5100000	5200000	0.00027149
chr19	12000000	12250000	0.00026816			chr3	18500000	18600000	0.00026877
chr7	107000000	107250000	0.00026635			chr4	115500000	115600000	0.00026781
chr10	130000000	130250000	0.00026474	Yes		chr8	96200000	96300000	0.00026735
chr14	52250000	52500000	0.00026468			chr19	35300000	35400000	0.00026718
chr11	49250000	49500000	0.00026245			chr14	68200000	68300000	0.00026644
chr10	129500000	129750000	0.00026197			chr9	17600000	17700000	0.00026624
chr2	90000000	90250000	0.00026051			chr6	76200000	76300000	0.00026516
chr11	73750000	74000000	0.00025599			chr6	132200000	132300000	0.00025731
chr7	108250000	108500000	0.00025368			chr6	132400000	132500000	0.00025656
chr9	36500000	36750000	0.00025134			chr9	36000000	36100000	0.00025618
chr10	129250000	129500000	0.00024942			chr6	131000000	131100000	0.00025293
chr14	52500000	52750000	0.00024693	Yes		chr12	104400000	104500000	0.00025201
chr9	39500000	39750000	0.00024591			chr12	104500000	104600000	0.00024789
chr9	39750000	40000000	0.00024541	Yes		chr9	68400000	68500000	0.00024788
chr16	58750000	59000000	0.00024435	Yes		chr11	99600000	99700000	0.00024542
chr10	129000000	129250000	0.00024108			chr15	23700000	23800000	0.00024523
chr16	3500000	3750000	0.00023623			chr6	132600000	132700000	0.00024363
chr1	173000000	173250000	0.00023619	Yes		chr11	10400000	10500000	0.00024307
chr2	36750000	37000000	0.00023559			chr6	19400000	19500000	0.00024265
chr10	128750000	129000000	0.00023554	Yes		chr4	114700000	114800000	0.00024164
chr11	73500000	73750000	0.00023508			chr1	188200000	188300000	0.00024155
chr7	102500000	102750000	0.00023313	Yes		chr6	74600000	74700000	0.00023769
chr11	87750000	88000000	0.00023301	Yes		chr6	101900000	102000000	0.00023725
chr9	19750000	20000000	0.00023179			chr16	19600000	19700000	0.00023717
chr2	85500000	85750000	0.00023172			chr11	12800000	12900000	0.00023653
chr2	111750000	112000000	0.00023106	Yes		chr13	118900000	119000000	0.00023568
chr7	107750000	108000000	0.00023082			chr17	77700000	77800000	0.00023299
chr10	129750000	130000000	0.00022948			chr13	106100000	106200000	0.00023272
chr1	92500000	92750000	0.00022869	Yes		chr1	85100000	85200000	0.0002297
chr7	108000000	108250000	0.00022821			chr17	44400000	44500000	0.00022934
chr9	20000000	20250000	0.00022787			chr4	51100000	51200000	0.00022875
chr9	37250000	37500000	0.00022784			chr9	67600000	67700000	0.00022821
chr14	50250000	50500000	0.00022665			chr4	51200000	51300000	0.0002273
chr17	37250000	37500000	0.00022618			chr8	36600000	36700000	0.00022539
chr10	78750000	79000000	0.00022576			chr16	6000000	6100000	0.00022493
chr9	40000000	40250000	0.00022538			chr18	86400000	86500000	0.00022454
chr2	89750000	90000000	0.00022339			chr9	32600000	32700000	0.00022118
chr15	98250000	98500000	0.00022252	Yes		chr8	53100000	53200000	0.00022091
chr17	37500000	37750000	0.00022229	Yes		chr6	104400000	104500000	0.00022064
chr11	73250000	73500000	0.0002216			chr8	119100000	119200000	0.00022048
chr11	51000000	51250000	0.00022155			chr12	48700000	48800000	0.00022017
chr19	13250000	13500000	0.00022084			chr15	16800000	16900000	0.00021842
chr11	58250000	58500000	0.00021913			chr6	41600000	41700000	0.00021766
chr14	50750000	51000000	0.0002178	Yes		chr10	3200000	3300000	0.00021765
chr9	36250000	36500000	0.00021734			chr18	85200000	85300000	0.00021558
chr7	99750000	100000000	0.0002164	Yes		chr7	70100000	70200000	0.00021546
chr19	11500000	11750000	0.00021628			chr18	86100000	86200000	0.00021377
chr11	3000000	3250000	0.0002161			chr10	129200000	129300000	0.0002134
chr10	79000000	79250000	0.0002156			chr6	139100000	139200000	0.00021333
chr9	38000000	38250000	0.0002134			chr17	52400000	52500000	0.00021291
chr11	58750000	59000000	0.00021273	Yes		chr7	95100000	95200000	0.00021232
chr9	39250000	39500000	0.00021057			chr8	65800000	65900000	0.0002119
chr14	51500000	51750000	0.00021025			chr19	51400000	51500000	0.00021166
chr9	20250000	20500000	0.00020776			chr18	51400000	51500000	0.00020794
chr19	13500000	13750000	0.00020773			chr6	138800000	138900000	0.00020669
chr2	111500000	111750000	0.00020648	Yes		chr11	87750000	88000000	0.00020573	Yes
chr9	19000000	19250000	0.00020642			chr5	77500000	77600000	0.00020556
chr16	19250000	19500000	0.00020631			chr6	138000000	138100000	0.00020524
chr11	49500000	49750000	0.00020625	Yes		chr12	87500000	87600000	0.00020515
chr14	51250000	51500000	0.00020375			chr11	46600000	46700000	0.00020514
chr9	39000000	39250000	0.00020101			chr16	7000000	7100000	0.00020409
chr9	38250000	38500000	0.0002007			chr19	20100000	20200000	0.00020405
chr6	116500000	116750000	0.00020052	Yes		chr10	71800000	71900000	0.00020331
chr14	14250000	14500000	0.00019981			chr6	21100000	21200000	0.00020322
chr7	106750000	107000000	0.00019918			chr4	61700000	61800000	0.00020215
chr14	51000000	51250000	0.0001989			chr9	17100000	17200000	0.00020201
chr10	78500000	78750000	0.00019859	Yes		chr3	111100000	111200000	0.00019837
chr2	85250000	85500000	0.00019832			chr12	49000000	49100000	0.00019762
chr17	33000000	33250000	0.00019744			chr15	15600000	15700000	0.00019626
chr9	38750000	39000000	0.00019305			chr12	7500000	7600000	0.00019617
chr6	42750000	43000000	0.00019209	Yes		chr6	89800000	89900000	0.00019541
chr2	36500000	36750000	0.00019159			chr15	47200000	47300000	0.00019524
chr17	37000000	37250000	0.00019124			chr10	73000000	73100000	0.00019487
chr17	32500000	32750000	0.00019066			chr8	100200000	100300000	0.00019433
chr9	38500000	38750000	0.00018998			chr6	110500000	110600000	0.00019429
chr7	99500000	99750000	0.00018989	Yes		chr11	39500000	39600000	0.00019275
chr16	3250000	3500000	0.00018989			chr18	64300000	64400000	0.00019233
chr2	36250000	36500000	0.00018951			chr4	122500000	122600000	0.00019108
chr17	36500000	36750000	0.00018949			chr12	89600000	89700000	0.00019084
chr2	86000000	86250000	0.00018844			chr4	144000000	144100000	0.00018581
chr1	174250000	174500000	0.00018777	Yes		chr8	115400000	115500000	0.00018503
chr19	13750000	14000000	0.00018575			chr13	50300000	50400000	0.000185
chr11	74250000	74500000	0.00018563			chr19	11200000	11300000	0.00018449
chr2	88250000	88500000	0.00018389			chr9	16700000	16800000	0.00018424
chr17	33250000	33500000	0.00018252			chr10	48900000	49000000	0.00018401
chr16	59000000	59250000	0.00018172			chr9	16600000	16700000	0.00018401
chr1	173250000	173500000	0.00018123	Yes		chr16	61000000	61100000	0.00018348
chr9	124250000	124500000	0.00018086			chr5	78300000	78400000	0.00018348
chr2	37250000	37500000	0.00018072			chr16	60400000	60500000	0.00018336
chr13	21500000	21750000	0.00018042			chr11	39900000	40000000	0.00018126
chr1	173750000	174000000	0.00017969			chr3	153000000	153100000	0.00017887
chr11	49000000	49250000	0.00017964			chr3	17300000	17400000	0.00017854
chr2	112000000	112250000	0.00017959	Yes		chr6	105200000	105300000	0.00017837
chr14	50500000	50750000	0.00017889			chr14	123700000	123800000	0.00017822
chr11	50750000	51000000	0.00017773	Yes		chr14	68700000	68800000	0.00017725
chr14	50000000	50250000	0.00017754			chr5	10500000	10600000	0.00017647
chr4	118500000	118750000	0.00017658	Yes		chr17	70600000	70700000	0.00017567
chr7	102750000	103000000	0.00017654			chr13	61300000	61400000	0.00017529
chr2	85750000	86000000	0.00017552			chr5	37400000	37500000	0.0001746
chr2	98500000	98750000	0.00017537			chr8	108400000	108500000	0.00017452
chr17	38000000	38250000	0.00017359			chr12	105300000	105400000	0.00017414
chr14	14000000	14250000	0.00017274			chr11	83000000	83100000	0.0001732
chr10	130250000	130500000	0.00017214			chr6	16300000	16400000	0.00017214
chr2	85000000	85250000	0.00017204			chr3	72400000	72500000	0.00017158
chr2	89500000	89750000	0.00017159			chr14	74400000	74500000	0.0001715
chr11	71750000	72000000	0.00017156			chr3	112300000	112400000	0.00017055
chr19	11750000	12000000	0.0001715			chr10	33100000	33200000	0.00016992
chr7	140250000	140500000	0.0001713			chr11	82300000	82400000	0.0001698
chr7	121250000	121500000	0.00017128			chr8	99500000	99600000	0.00016972
chr7	86250000	86500000	0.00017116	Yes		chr5	95800000	95900000	0.00016963
chr1	88000000	88250000	0.00017107			chr5	119500000	119600000	0.00016846
chr17	32750000	33000000	0.00017101			chr6	121600000	121700000	0.00016818
chr5	104500000	104750000	0.00017003			chr16	59300000	59400000	0.0001681
chr7	107500000	107750000	0.00016932			chr19	39100000	39200000	0.00016783
chr1	173500000	173750000	0.00016891			chr10	87100000	87200000	0.00016754
chr16	19000000	19250000	0.00016876			chr4	39800000	39900000	0.00016749
chr2	89250000	89500000	0.00016851			chr13	106500000	106600000	0.00016713
chr13	21250000	21500000	0.00016794	Yes		chr6	27200000	27300000	0.00016688
chr14	51750000	52000000	0.00016732			chr14	71500000	71600000	0.00016652
chr9	18750000	19000000	0.00016731			chr11	91800000	91900000	0.0001665
chr9	124000000	124250000	0.00016662			chr3	94100000	94200000	0.00016603
chr13	21000000	21250000	0.00016655			chr14	114500000	114600000	0.00016556
chr2	87500000	87750000	0.00016649			chr6	19600000	19700000	0.0001655
chr19	11250000	11500000	0.00016641			chr10	51800000	51900000	0.00016475
chr6	122250000	122500000	0.00016579			chr7	91400000	91500000	0.00016426
chr11	48500000	48750000	0.0001652			chr14	112800000	112900000	0.00016386
chr2	87750000	88000000	0.00016483			chr11	47400000	47500000	0.00016274
chr7	6500000	6750000	0.00016414	Yes		chr6	104900000	105000000	0.0001627
chr17	37750000	38000000	0.00016304			chr5	6500000	6600000	0.00016267
chr6	116250000	116500000	0.00016078			chr10	126700000	126800000	0.0001622
chr2	90500000	90750000	0.00016068			chr3	159700000	159800000	0.00016198
chr10	79250000	79500000	0.00016056			chr17	82200000	82300000	0.00016114
chr2	89000000	89250000	0.00015986			chr11	6700000	6800000	0.0001599
chr9	35750000	36000000	0.00015935			chr7	69900000	70000000	0.00015874
chr19	14000000	14250000	0.00015928	Yes		chr18	52400000	52500000	0.00015852
chr16	19500000	19750000	0.00015918			chr6	52300000	52400000	0.00015655
chr9	3000000	3250000	0.00015885			chr1	19900000	20000000	0.00015641
chr14	49750000	50000000	0.00015805			chr10	63800000	63900000	0.00015592
chr7	106500000	106750000	0.00015781			chr7	87000000	87100000	0.00015574
chr7	121500000	121750000	0.00015729			chr9	6000000	6100000	0.00015573
chr7	140000000	140250000	0.00015674	Yes		chr10	56500000	56600000	0.00015538
chr11	51250000	51500000	0.00015654			chr6	69500000	69600000	0.00015443
chr11	55750000	56000000	0.00015608			chr5	71700000	71800000	0.00015428
chr9	36750000	37000000	0.00015605			chr10	113900000	114000000	0.00015308
chr7	140500000	140750000	0.00015603			chr4	147400000	147500000	0.00015293
chr9	18250000	18500000	0.00015526			chr10	122300000	122400000	0.00015148
chr12	3000000	3250000	0.00015478			chr6	3000000	3100000	0.00015143
chr1	172750000	173000000	0.00015477			chr13	7900000	8000000	0.0001507
chr11	58000000	58250000	0.00015443			chr14	33700000	33800000	0.00015034
chr13	65000000	65250000	0.00015438	Yes		chr8	81100000	81200000	0.00014954
chr5	104750000	105000000	0.00015418			chr8	129200000	129300000	0.00014931
chr18	36750000	37000000	0.00015393			chr4	127700000	127800000	0.00014899
chr9	35500000	35750000	0.00015375			chr17	55300000	55400000	0.0001485
chr2	76750000	77000000	0.00015362			chr18	20400000	20500000	0.00014827
chr14	54000000	54250000	0.0001533			chr15	22300000	22400000	0.00014813
chr11	71250000	71500000	0.000152			chr8	76200000	76300000	0.00014779
chr14	54250000	54500000	0.00015191	Yes		chr14	19300000	19400000	0.00014716
chr2	88750000	89000000	0.00015116			chr6	3100000	3200000	0.0001465
chr10	82250000	82500000	0.00015105			chr10	123400000	123500000	0.00014575
chr10	130500000	130750000	0.00015075			chr8	75500000	75600000	0.00014545
chr18	37250000	37500000	0.00015036			chr3	159300000	159400000	0.00014411
chr9	36000000	36250000	0.00015017			chr14	35600000	35700000	0.00014399
chr11	56000000	56250000	0.00015016			chr10	123200000	123300000	0.00014397
chr7	107250000	107500000	0.00014951			chr5	59500000	59600000	0.00014317
chr11	48750000	49000000	0.0001494			chr8	27500000	27600000	0.00014296
chr14	53250000	53500000	0.00014772			chr10	46100000	46200000	0.00014272
chr2	88000000	88250000	0.00014761			chr1	18100000	18200000	0.00014223
chr2	86250000	86500000	0.00014753			chr12	90000000	90100000	0.00014043
chr11	34500000	34750000	0.00014702			chr13	18100000	18200000	0.00013996
chr1	92250000	92500000	0.00014664			chr6	74800000	74900000	0.00013992
chr2	88500000	88750000	0.00014658			chr13	12300000	12400000	0.00013975
chr11	57000000	57250000	0.00014642			chr5	71100000	71200000	0.00013965
chr11	71000000	71250000	0.00014635			chr10	64600000	64700000	0.00013943
chr14	52000000	52250000	0.0001462			chr13	10700000	10800000	0.00013605
chr19	14250000	14500000	0.00014586			chr3	154100000	154200000	0.00013605
chr19	8000000	8250000	0.00014552			chr7	137900000	138000000	0.00013537
chr19	11000000	11250000	0.00014467			chr1	120600000	120700000	0.00013017
chr2	87250000	87500000	0.00014418			chr16	3300000	3400000	0.0001273
chr17	38500000	38750000	0.00014411			chr12	92500000	92600000	0.00012717
chr14	19250000	19500000	0.00014404			chr11	10900000	11000000	0.00012535
