# Supplementary material for: Systematic identification of interchromosomal interaction networks supports the existence of specialized RNA factories
Source: HighWire-hosted journal article supplement (doi:10.1101/gr.278327.123), 2024-09-25
Supplement: Supplemental_Table_S2.xlsx [file Supplemental_Table_S2.xlsx]

## Sheet: Table S2
Supplementary Table 2: Established RBM20 targets-based clique (top 200)
Late CMs						Early CMs						hPSCs
Gene	Visitational Frequency	RBM20 targets from Bertero 2019	All RBM20 bound	High confidence list		Gene	Visitational Frequency	RBM20 targets from Bertero 2019	All RBM20 bound	High confidence list		Gene	Visitational Frequency	RBM20 targets from Bertero 2019	All RBM20 bound	High confidence list
TTN	0.166765	Yes	Yes	Yes		TTN	0.108999	Yes	Yes	Yes		TTN	0.142645	Yes	Yes	Yes
CACNA1C	0.166757	Yes	Yes	Yes		CACNA1C	0.108824	Yes	Yes	Yes		CACNA1C	0.141887	Yes	Yes	Yes
CAMK2D	0.166752	Yes	Yes	Yes		CAMK2D	0.108796	Yes	Yes	Yes		CAMK2D	0.1363	Yes	Yes	Yes
KCNIP2	0.16385	Yes				KCNIP2	0.105007	Yes				KCNIP2	0.135781	Yes
CAMK2G	0.163783	Yes				CAMK2G	0.104652	Yes				CAMK2G	0.134621	Yes
FLJ13852	0.00037599					CCP3	0.00029458					IKBR	0.00041758
MTMR1	0.00036516	Yes				HDGFRP2	0.0002943					MGC44505	0.00039731
SDR4E1	0.00034815					JPX	0.00026816		Yes			AMOG	0.00037317
HU-2	0.00030232					ZIP7	0.00026261					GNAZ	0.00036327
BA514O12.3	0.00029963					TAIL1	0.0002617					FLJ22938	0.00034076
FGFR1OP	0.00029339					PTI	0.00026157					CSTF-77	0.00033852
ALP56	0.00029161					APO-3	0.00025675					ZIP14	0.00033739
SLC38A10	0.00028929	Yes				DTNB	0.00025337					IGLON2	0.00033498
ERG-3	0.00028241					PGY4	0.00025255					MGC45594	0.00032326
FLJ33600	0.00027691					TWA1	0.00024907					PBMUCL1	0.00032133
HSPC289	0.00027364					FLJ22583	0.00024862					MGC15873	0.000314
HPS8	0.00026986					PRP-B	0.00024667					TRNR2	0.00030719
LQT5	0.0002694					C1ORF106	0.00024572					RGS14	0.00030551
MSK	0.00026781					EPG4	0.00024566					MACAM1	0.00029193
P101	0.00026661					FLJ20898	0.00024345					NS5ATP1	0.00029151
FLJ12582	0.00026551					MACROH2A2	0.00024319					TSPAN26	0.00028991
GAS11	0.00026234					p130	0.00024294					Cad	0.00028805
ZNF910	0.00025978					FHOD3	0.00024258	Yes	Yes	Yes		KIAA0404	0.00028626
KIAA0934	0.00025972					ACP5	0.00023819					SPATA38	0.00028542
DJ351K20.1	0.00025732					DJ824F16	0.00023715					GIII-SPLA2	0.00028483
P50BP	0.00025665					KIAA0863	0.00023478					KIAA1855	0.00028121
FLJ44299	0.00025478					BHLHA27	0.00023433					RRF	0.00028071
GSE1	0.0002525		Yes	Yes		PHZ-67	0.00023387					INSSA3	0.00028054
SUP	0.00025117					DAP-1	0.00023244					VPS38	0.00027999
BPIFF	0.00024434					LOC57722	0.00023203					FLJ22160	0.0002753
FLJ21709	0.00024347					SPINLW1-WFDC6	0.00023178					VEGFR1	0.00027481
MGC26158	0.00024266					PPP1R144	0.00023007					RP48	0.0002738
KA35	0.00024075					NF1	0.00022815					CPLA2-GAMMA	0.00027329
KA36	0.00023639					DKFZP43N024	0.00022815					DKFZP686E01200	0.00026981
KAP3.3	0.00023609					PLGP1	0.00022655					DKFZP434E229	0.00026954
KAP3.2	0.00023331					FLJ33071	0.00022641					RNF105	0.00026685
FLJ45455	0.00023189					KIAA1439	0.00022633					GPR25	0.00026516
C21ORF258	0.00023032					FLJ37528	0.00022608					CHKB-CPT1B	0.00026447
GATA6	0.00023025					TGP	0.0002216					AD-004	0.00026443
INPP5G	0.00022834					FLJ23841	0.00022053					HAPONIN	0.00026322
FSAP105	0.00022695					SCDO3	0.00022014					LOC399888	0.0002624
SEMA6D	0.00022677	Yes				KAPPA-200	0.0002178					FLJ44618	0.00025841
ARVCF	0.00022517					RAB3A	0.00021582					LASS6	0.00025765
DKFZP761P1121	0.00022468					RAP30	0.00021581					PRMT4	0.00025723
PASHA	0.00022427					PPP1R85	0.00021483					FLJ25008	0.00025481
DKFZP451I2418	0.00022201					VPS16	0.00021395					CD351	0.00025474
KIAA0381	0.00022186					DKFZP434I1117	0.0002107					GALNAC6S	0.00025467
NKX4-1	0.00022184					P110D	0.00021023					LINK-GEFII	0.00025445
MGC33329	0.00022132					E2F-2	0.00020979					GRCC8	0.00025412
C7ORF57	0.0002213					DJ530I15	0.00020837					FLJ46536	0.00025346
UDRPASE	0.0002213					BA444G7	0.00020837					TAFI	0.00025155
SLC25A30	0.00022007					IPO1	0.00020647					DKFZP686J07229	0.00024996
SEC34	0.00022005					INPP5	0.00020635					PAR-6B	0.00024963
BNF1	0.00021981					C16ORF11	0.00020527					C1RL1	0.00024766
KIAA1991	0.00021972					ZUD	0.0002051					GPR8	0.00024631
SH3BP4	0.00021791					BM600-100KDA	0.00020486					PR61G	0.000246
DFNB29	0.00021751					ZNEU1	0.00020304					DMDL	0.00024591
SOX1	0.00021608					MGC1348	0.00020291					FLJ44753	0.00024502
ZNF916A	0.00021512					FLJ42707	0.00020238					STARA	0.00024471
NKX4-2	0.00021364					HSPC203	0.0002017					FLJ21281	0.00024417
PELI2	0.00021257					SPLUNC3	0.00020144					ANAMORSIN	0.00024366
SMOC2	0.00021224					LDLRAD2	0.00020124					CYP46	0.00024354
YPEL1	0.000212					SPC	0.00020077					IRX-3	0.00024324
ITF	0.00021152					HSBP1	0.00019997					CNB1	0.0002417
SML1	0.00020882					GIYD1	0.00019886					DSC92	0.00023979
HP1.A	0.0002076					MCP3	0.00019864					MINT3	0.00023942
DFNB8	0.00020518					SC1	0.00019791					GRB7	0.00023771
SDR21C2	0.0002034					P101	0.00019653					KIAA0252	0.00023767
KIAA0933	0.00020283					GALNR	0.00019647					ACSVL4	0.00023346
ATP5JG	0.00020131					PDZD7B	0.00019622					FLJ20010	0.00023309
MLL1A	0.00020096					RNF147	0.00019507					FLJ33970	0.00023241
RECQ2	0.00020058					KIAA1887	0.0001939					MLL1A	0.00023235
GLUN3B	0.00019905					TPM1	0.00019341	Yes	Yes	Yes		PHAPI2	0.00023214
MBRL	0.00019876					RGSL2	0.00019316					GALNAC-T16	0.00023126
CNN2	0.00019834					MENA	0.00019303					TRH1	0.00023024
ABCX	0.00019817					PLA2G4F/Z	0.00019256					PSMB6I	0.00022895
ARHGAP45	0.00019756					RAB24	0.00019202					FLJ12541	0.00022795
HSRPB5	0.00019733					KIAA1197	0.00019137					SPG65	0.00022721
IZP6	0.00019557					BETA5I	0.00019072					WINS1	0.00022716
GLUT11	0.00019314					ATP6N1D	0.00019012					NF-E2	0.00022707
GLIF	0.00019307					ZSCAN37	0.0001888					LOXC	0.00022678
NOGOR	0.00019167					KIAA1691	0.00018822					CRABPI	0.00022624
KIAA0639	0.00019146					GNB1	0.00018752					MGC17839	0.00022569
FLJ40244	0.0001912					VIP1	0.0001875					HC7-I	0.00022554
FKHRL1P1	0.0001895					PIG3	0.00018628					CPA5	0.00022521
GGT2	0.00018856					KRM2	0.00018587					KIAA1673	0.00022417
SLRR3A	0.00018612					RNG105	0.0001854					SNRNP110	0.00022212
SLRR2C	0.00018461					YCR016W	0.00018517					FRCL1	0.00021976
PLAP1	0.00018421					BNF1	0.00018455					Orf26	0.00021946
CT132	0.00018365					CT120	0.00018404					HST2697	0.00021683
TRAP240	0.00018321					CORONIN-2	0.00018379					C19ORF73	0.00021376
CRF1	0.00018008					CT156	0.00018346					CRYG2	0.00021238
ZNF851	0.0001792					GPATC8	0.00018338					PPP1R150	0.00021209
TDRD17	0.00017898					PRELID3A	0.00018267					CIA1	0.00021168
CES1A2	0.00017883					UNC112C	0.00018254					WDR86	0.00021166
CP107	0.00017784					FLJ12851	0.0001823					KIAA1665	0.0002116
HIP4	0.00017742					DJ34B21	0.0001821					PANP	0.00021112
CORO7-PAM16	0.00017735					BART1	0.00018134					LIV-1	0.00021098
FLJ22021	0.00017537					KIAA1164	0.00018048					KIAA1828	0.00020912
HTID-1	0.00017468					GAL3ST1	0.00018003					FLJ11190	0.00020731
SDR48A1	0.00017286					OMP	0.00017999					LPI-PC1	0.00020704
HO-2	0.00017254					CT111	0.00017965					KALRN	0.0002065	Yes
C14ORF73	0.00017239					FLJ13287	0.00017916					VAV2	0.00020576
EXOC3L3	0.00017154					BHLHB25	0.00017884					SLC9A1BP	0.00020552
KV2.1	0.00017104					C11ORF85	0.00017877					TMEM112B	0.00020472
GOLGA8R	0.00016969					B7323	0.00017616					ADAMTSL6	0.00020429
ATG1B	0.00016959					RNF21	0.00017547					EPITEMPIN	0.00020379
SFRSK1	0.00016958					FLJ39565	0.00017458					SUA5	0.0002031
BHLHE15	0.00016829					MGC4639	0.00017452					HMAFF	0.00020107
P21CIP1/WAF1	0.00016788					KIAA0233	0.00017442					HTGN29	0.00020025
DJ431A14.3	0.00016768					FLJ00391	0.0001742					BBS19	0.00019946
FLJ25477	0.00016507					MGC15749	0.0001737					RNF156	0.00019861
CUT9	0.00016454					KMT2G	0.00017257					NARR	0.00019834
HMIS18ALPHA	0.00016398					CTR1	0.00017203					D0S117E	0.00019826
FALP	0.00016386					BA319I23	0.00017198					CYP4F11	0.00019698
BA164L23.1	0.00016292					CaBP3	0.00017178					HCCR-2	0.00019645
FLJ34389	0.0001629					DKFZP434H2215	0.00017085					PPP1R106	0.00019584
FLJ25287	0.0001628					HLHX2	0.0001695					CD102	0.00019577
IDH2	0.00016258					C14ORF164	0.00016946					ROLT	0.00019576
MGC131831	0.00016153					FLJ20417	0.00016911					SKY	0.00019496
ZABC1	0.00016148					P28ING5	0.00016871					GPR35	0.00019305
MGC75360	0.00016074					FLJ10665	0.00016791					CLUH	0.00019216
HUMORFA01	0.00016001					PRO3113	0.00016774					FLJ46061	0.00019195
ZNF40C	0.00015966					RDX12	0.00016757					WDR93	0.00019195
HRNBP3	0.00015948					TM7XN1	0.00016755					NCBP2-AS2	0.00019193
FLJ78302	0.00015736					GALIG	0.00016606					MGC23908	0.0001909
IDDM22	0.00015718					BDPL	0.00016583					TMEM120B	0.00019068
SERZ1	0.00015673					KIAA0970	0.00016549					BTBD29	0.00019022
KIAA0513	0.00015642					MGCR1	0.0001648					SMC	0.00018839
ATPO	0.00015641					CT53	0.000164					YHC1	0.00018741
FLJ32828	0.00015634					WS9-14	0.00016317					DJ90G24	0.00018506
C21ORF83	0.00015531					RNF109	0.00016276					BARX1	0.00018505
PKK	0.00015531					VID24	0.00016259					P44ERK1	0.0001845
RP47	0.00015464					MGC14386	0.00016172					HIGIRK2	0.00018429
DGKDELTA	0.00015454					SIMRP7	0.00016141					SIT1	0.00018347
GPX3	0.00015446					PPP1R53	0.00016131					ALS	0.00018186
VAN	0.00015374					UBALD1	0.00016125					LOC150383	0.0001815
PCBP3	0.00015231					DP5	0.0001605					HPE4	0.00018123
OSC	0.00015205					CBX6	0.00016046					TMEM238	0.00018038
GANP	0.00015158					KIAA0969	0.00016005					RAB3IL1	0.00017966
C21ORF57	0.00015097					BCA3	0.00015962					MGC116789	0.00017911
BART1	0.00015087					UTP30	0.00015949					RPL11	0.0001791
PMLP	0.0001507					FLJ21439	0.00015936					SGK495	0.00017855
ECHD	0.00015039					TAF(II)43	0.00015812					RP65	0.00017807
MEKK13	0.00014914					ZNF828	0.00015796					MIO10	0.00017771
DKFZP761D081	0.00014807					FLJ13855	0.0001572					JV5-1	0.00017726
PDLIM5	0.00014774	Yes				RNF202	0.00015677					PHZ-49	0.00017718
ZFGF5	0.00014766					FYVE-DSP1	0.00015648					LOC374920	0.00017708
KIAA1080	0.00014727					DKFZP434K046	0.00015632					SCC-S2	0.00017661
MSE1	0.00014713					KIAA1824	0.00015566					ERICH1	0.0001763
UBPH	0.00014709					SVCT1	0.00015563					HOX3B	0.0001737
ACP	0.00014624					KIAA1655	0.00015485					SOGA2	0.00017351
bHLHe23	0.00014533					HESR3	0.00015476					KIAA1909	0.00017309
HSPC105	0.0001452					PRSS50	0.00015391		Yes	Yes		DKFZP586M1120	0.00017263
SDR9C2	0.00014413					SPI-1	0.0001539					SLC2C	0.00017199
KIAA0355	0.00014349					PDE9A	0.00015379					FLJ39091	0.00017164
CAPERBETA	0.00014339					PATZ	0.00015338					SCLIP	0.00016947
SKB1HS	0.00014336					FLJ13970	0.00015297					DEFB-25	0.00016664
FLJ20424	0.00014283					KIAA1515	0.0001529					STIP	0.00016652
MGC15563	0.00014269					ERBA-BETA	0.00015288					DBY	0.00016628
RBEL1	0.00014256					MTRNR2L8	0.00015281					KIAA1991	0.00016594
C9ORF172	0.00014234					ANTI-ELASTASE	0.00015128					ABHD12A	0.00016561
BA216L13.10	0.00014195					P21CIP1/WAF1	0.00015038					IP90	0.0001655
DKFZP434M1411	0.00014144					ATP5JG	0.00014956					PXMP2	0.00016529
EDF-1	0.00014084					ECGF1	0.00014935					FLJ10786	0.00016512
TRAP3	0.0001408					IFT70	0.0001492					ZNF766	0.00016511
SGK269	0.00014077					TRIM40	0.00014874					RTN3	0.0001646		Yes	Yes
HMGXB1	0.00013892					AD4BP	0.00014853					FLJ37794	0.00016414
IGLL5	0.00013827					FLJ36890	0.00014849					PIPPIN	0.00016306
NTE-R1	0.00013808					MPZL3	0.00014763					NET3	0.0001626
BMRP	0.00013797					PRELID3B	0.00014732					EFERIN	0.00016162
RRT2	0.00013713					IRF5	0.0001451					EPM	0.00016135
MIZIP	0.00013629					TDRP2	0.00014506					EDEN-BP	0.00016054
AMZ2	0.00013619					FLJ22692	0.00014489					DJ836N17	0.00016033
KIAA1001	0.00013536					MGC189743	0.00014474					MB1	0.00016003
MCT6	0.00013507					CCS	0.00014412					SNAMA	0.00015978
ZFYVE5	0.0001348					MGC31967	0.0001439					NIPSNAP1	0.00015972
RALGAPBETA	0.00013465					FAM77A	0.00014381					MGC3121	0.00015944
PPP1R28	0.00013449					CT151	0.00014362					MEKK7	0.00015916
F7	0.00013428					CHGN	0.00014342					CK10	0.00015766
F10	0.00013423					MGC126572	0.00014253					BETA5T	0.00015705
PZ	0.000134					TYRO5	0.00014244					LYGH	0.00015684
FHOD3	0.00013377	Yes	Yes	Yes		PRED77	0.00014195					FLJ11305	0.0001561
TRAP240L	0.00013324					KIAA0381	0.00014177					NFAR-1	0.00015549
TM7XN1	0.00013225					DKFZP434I0121	0.00014176					LUMA	0.00015511
PGR26	0.00013218					FLJ10769	0.00014168					ANAPC12	0.00015365
CFAP50	0.00013211					CI-51K	0.00014107					KIAA0354	0.00015318
HRG2	0.00013131					KIAA0925	0.0001405					RNF79	0.00015105
TGE	0.00013096					VWA5C	0.00013923					FLJ30401	0.00015081
BA371L19.3	0.00013051					FLJ00086	0.00013801					KIAA0102	0.00014924
ABC8	0.00012975					MTCP1NB	0.00013773					SHB	0.00014908
KIAA1227	0.00012946					HC90	0.00013656					PPM2C2	0.0001481
UMODL1	0.00012918					CAR4	0.00013559					MGC15875	0.00014776
MNBH	0.00012872					MGC13010	0.0001351					NM15	0.00014737
C10ORF120	0.00012725					FREAC4	0.0001349					CCRK	0.00014673
CHD2-52	0.0001268					NTPDASE-5	0.00013435					ERG-3	0.00014315
QSK	0.00012652					NET29	0.0001315					SGK071	0.00014172
DJ836N17.2	0.00012632					BA514O12	0.00013057					FLJ20671	0.00014148
FIGLER2	0.00012602					SID6-1512	0.00012966					NPM2	0.00014105
UTP30	0.00012533					KLG	0.00012959					PROTOR-1	0.00014082
