# Supplementary material for: Systematic identification of interchromosomal interaction networks supports the existence of specialized RNA factories
Source: HighWire-hosted journal article supplement (doi:10.1101/gr.278327.123), 2024-09-25
Supplement: Supplemental_Table_S3.xlsx [file Supplemental_Table_S3.xlsx]

## Sheet: Table S3
Supplementary Table 3: RBM20-bound mRNAs-based clique
Late CMs						Early CMs						hPSCs
Gene	Visitational Frequency	RBM20 targets from Bertero 2019	All RBM20 bound	High confidence list		Gene	Visitational Frequency	RBM20 targets from Bertero 2019	All RBM20 bound	High confidence list		Gene	Visitational Frequency	RBM20 targets from Bertero 2019	All RBM20 bound	High confidence list
TTN	0.154757	Yes	Yes	Yes		TTN	0.126846	Yes	Yes	Yes		TTN	0.112867	Yes	Yes	Yes
SLC8A1	0.1532	no	Yes	Yes		SLC8A1	0.125984	no	Yes	Yes		SLC8A1	0.112852	no	Yes	Yes
NEAT1	0.153033	no	Yes	no		NEAT1	0.125763	no	Yes	no		NEAT1	0.110554	no	Yes	no
LDB3	0.152149	Yes	Yes	Yes		LDB3	0.125762	Yes	Yes	Yes		LDB3	0.110108	Yes	Yes	Yes
OBSCN	0.15174	no	Yes	Yes		OBSCN	0.122399	no	Yes	Yes		OBSCN	0.109597	no	Yes	Yes
ZASP	0.00053402	no	no	no		BCL7C	0.00013532	no	no	no		FBX32	0.0001613	no	no	no
ARHGEF30	0.00012768	no	no	no		ANGPT4	0.00013414	no	no	no		MGC71764	0.00015838	no	no	no
MGC119100	0.00012239	no	no	no		KIAA1791	0.00013273	no	no	no		D4ST-1	0.00015559	no	no	no
ZNF911	0.00012137	no	no	no		MLF2	0.00013228	no	no	no		PRO1914	0.00015419	no	no	no
RBEL1	0.00012133	no	no	no		APO-3	0.0001321	no	no	no		DMGDH	0.000154	no	no	no
C9ORF172	0.00012118	no	no	no		YSK1	0.00013141	no	no	no		HBR-STL-1	0.00015218	no	no	no
BA216L13	0.00012115	no	no	no		SECISBP2	0.00013119	no	no	no		KIAA1649	0.00015217	no	no	no
DKFZP434M1411	0.00012103	no	no	no		GDOWN1	0.00013081	no	no	no		DUX4L24	0.00015045	no	no	no
EDF-1	0.00012091	no	no	no		YWHA1	0.00012878	no	no	no		S23	0.00014988	no	no	no
TRAP3	0.00012023	no	no	no		C2GNT2	0.00012852	no	no	no		KIAA0233	0.0001492	no	no	no
USP17L10	0.00011981	no	no	no		FLJ20580	0.00012841	no	no	no		MPIF2	0.00014898	no	no	no
GLUN3B	0.00011978	no	no	no		CPX-III	0.00012806	no	no	no		OR17-7	0.00014794	no	no	no
MBRL	0.00011957	no	no	no		FLJ22692	0.00012803	no	no	no		MAPK2	0.00014693	no	no	no
CNN2	0.00011932	no	no	no		TPSD1	0.00012672	no	no	no		HCAT2	0.00014429	no	no	no
ABCX	0.00011907	no	no	no		VPS16	0.00012609	no	no	no		CCDC182	0.00014407	no	no	no
ARHGAP45	0.00011899	no	no	no		HP40	0.00012523	no	no	no		BCL-RAMBO	0.0001426	no	no	no
HSRPB5	0.00011884	no	no	no		ISA2	0.00012504	no	no	no		SANCHO	0.00014218	no	no	no
C21orf58	0.00011775	no	no	no		GALNAC-T14	0.00012435	no	no	no		MGC119100	0.00014167	no	no	no
PCNTB	0.0001177	no	no	no		CNT3	0.00012433	no	no	no		VPS16	0.00014	no	no	no
ATP6B	0.0001177	no	no	no		NBIA2	0.00012427	no	no	no		PROTOR-1	0.00013895	no	no	no
RK	0.00011725	no	no	no		CRYG4	0.00012411	no	no	no		GALK	0.00013828	no	no	no
MGC26885	0.0001169	no	no	no		PCSK8	0.00012381	no	no	no		FLJ10488	0.00013817	no	no	no
ATP-BL	0.00011634	no	no	no		FBXL6	0.00012379	no	no	no		FLJ30626	0.00013777	no	no	no
ZADT	0.00011586	no	no	no		DPIII	0.00012095	no	no	no		MGC10481	0.00013689	no	no	no
RUNDATAXIN	0.0001158	no	no	no		FLJ10844	0.00012094	no	no	no		FLJ40244	0.00013663	no	no	no
CACNA1C	0.00011572	Yes	Yes	Yes		ZNF688	0.0001205	no	no	no		RABAPTIN-5	0.00013632	no	no	no
UIF	0.00011559	no	no	no		OCTS3	0.00012032	no	no	no		DMP4	0.00013594	no	no	no
MGC4126	0.00011524	no	no	no		CNB1	0.00011915	no	no	no		MGC88819	0.00013575	no	no	no
WDR6	0.00011512	no	no	no		TSP2	0.00011914	no	no	no		CEF1	0.0001357	no	no	no
FLJ10496	0.00011489	no	no	no		DRG2	0.00011827	no	no	no		FLJ14486	0.00013513	no	no	no
2P1	0.00011477	no	no	no		FLJ36128	0.00011822	no	no	no		MGC52498	0.00013493	no	no	no
IMPDH2	0.00011441	no	no	no		GDPGP1	0.00011761	no	no	no		MACROH2A2	0.00013459	no	no	no
FLJ20259	0.00011412	no	no	no		EPITEMPIN	0.00011756	no	no	no		GRCC8	0.00013299	no	no	no
S100BETA	0.0001138	no	no	no		FLJ44612	0.00011752	no	no	no		PRO1472	0.00013193	no	no	no
MGC111373	0.00011362	no	no	no		DJ1085F17	0.00011676	no	no	no		AQP12	0.00013184	no	no	no
ONECUT3	0.00011356	no	no	no		HST1707	0.00011671	no	no	no		DKFZP761B039	0.00013163	no	no	no
KIAA1193	0.0001135	no	no	no		RNF111L2	0.00011634	no	no	no		KIAA0602	0.00013148	no	no	no
THEG1	0.00011301	no	no	no		MEA	0.00011607	no	no	no		CALBL	0.00013019	no	no	no
GPCR97	0.00011184	no	no	no		TARG1	0.00011586	no	no	no		GALNAC-T14	0.00013015	no	no	no
MGC40555	0.00011176	no	no	no		MGC20149	0.00011554	no	no	no		MARAPSIN	0.00012983	no	no	no
KMT1D	0.00011142	no	no	no		RNU1-11P	0.00011548	no	Yes	no		ASL	0.00012982	no	no	no
MARAPSIN	0.00011088	no	no	no		ADGF	0.00011525	no	no	no		RBM7	0.00012847	no	no	no
Cwc21	0.0001105	no	no	no		HCAP-H	0.00011523	no	no	no		MYHC-PN	0.00012789	no	no	no
TCEB2	0.00011015	no	no	no		TEX30	0.00011494	no	no	no		ROBPI	0.00012784	no	no	no
PRSS33	0.00010942	no	no	no		BIMP3	0.00011382	no	no	no		HCS	0.00012729	no	no	no
TESSP1	0.00010889	no	no	no		SLC37A1	0.00011356	no	no	no		NPM2	0.00012612	no	no	no
TAN1	0.00010887	no	no	no		HOT1	0.00011302	no	no	no		L27A	0.00012523	no	no	no
BBC1	0.00010867	no	no	no		ARL12	0.00011087	no	no	no		ARFGAP3	0.00012474	no	no	no
CPNE7	0.00010785	no	no	no		IRKK	0.0001103	no	no	no		PRDM2	0.00012434	no	Yes	no
PLTN	0.0001057	no	no	no		HRC1	0.00010983	no	no	no		PPM2C2	0.00012394	no	no	no
LFG1	0.00010478	no	no	no		SPHK2	0.00010882	no	no	no		FAM1A	0.00012312	no	no	no
MGC30156	0.0001045	no	no	no		SERHL2	0.00010809	no	no	no		PLA2G13	0.00012291	no	no	no
HGLE1	0.00010174	no	no	no		FLJ32809	0.00010803	no	no	no		FLJ31164	0.00012239	no	no	no
SPTAN1	0.00010154	no	no	no		HTGN29	0.00010698	no	no	no		TDRD14B	0.00012146	no	no	no
FBL16	0.00010138	no	no	no		UTP7	0.00010352	no	no	no		CI-MNLL	0.0001214	no	no	no
MGC2601	0.00010098	no	no	no		HIP5	0.00010349	no	no	no		DJ310O13	0.00012074	no	no	no
MGC2494	0.00010042	no	no	no		HBA-T2	0.00010146	no	no	no		RAL	0.00012058	no	no	no
FLJ34512	9.96e-05	no	no	no		RPF-1	0.00010085	no	no	no		ZUD	0.00012011	no	no	no
MGC2605	9.83e-05	no	no	no		RNASE7	0.00010078	no	no	no		CGI-148	0.00011936	no	no	no
IOP1	9.58e-05	no	no	no		SBBI81	9.965e-05	no	no	no		ZSCAN8	0.00011919	no	no	no
MPF	9.49e-05	no	no	no		SDR9C2	9.953e-05	no	no	no		CORONIN-2	0.00011563	no	no	no
MPFL	9.2e-05	no	no	no		HOX3D	9.919e-05	no	no	no		IZP6	0.00011113	no	no	no
MGC19600	9.18e-05	no	no	no		ZNF424	9.79e-05	no	no	no		FMC1	0.00011043	no	no	no
CTF18	9.16e-05	no	no	no		MPFL	9.726e-05	no	no	no		eIF3i	0.00010974	no	no	no
FLJ20200	9.04e-05	no	no	no		30ST3A1	9.722e-05	no	no	no		CPX1	0.00010965	no	no	no
SAMP14	8.98e-05	no	no	no		MGC14254	9.443e-05	no	no	no		HP40	0.00010814	no	no	no
L18	8.91e-05	no	no	no		FBW11	9.317e-05	no	no	no		ACSVL4	0.00010814	no	no	no
SPHK2	8.91e-05	no	no	no		PARK15	9.079e-05	no	no	no		CaBP3	0.0001072	no	no	no
DABP	8.78e-05	no	no	no		KALRN	9.037e-05	Yes	no	no		TBE-1	0.00010504	no	no	no
CARPX1	8.6e-05	no	no	no		SIRT7	9.026e-05	no	no	no		ERGIC-53L	0.00010495	no	no	no
NTN5	8.55e-05	no	no	no		REV-ERBAALPHA	8.937e-05	no	no	no		RNF109	0.00010371	no	no	no
SEC2	8.41e-05	no	no	no		HIGD2BP	8.932e-05	no	no	no		FLJ13970	0.0001035	no	no	no
DKFZP666G247	8.37e-05	no	no	no		FLJ20623	8.899e-05	no	no	no		KAP9	0.00010218	no	no	no
FTCD	8.34e-05	no	no	no		LRCOL1	8.839e-05	no	no	no		N14	9.884e-05	no	no	no
SPATC1L	8.17e-05	no	no	no		HASPIN	8.816e-05	no	no	no		TSPAN26	9.81e-05	no	no	no
FLJ14464	8.15e-05	no	no	no		IL-22BP	8.724e-05	no	no	no		C316G12	9.79e-05	no	no	no
SPERIOLIN	8.15e-05	no	no	no		WAPL	8.416e-05	no	no	no		KIAA1175	9.614e-05	no	no	no
5-OPASE	8.11e-05	no	no	no		MGC26719	8.335e-05	no	no	no		HO-2	9.589e-05	no	no	no
P12A	8.1e-05	no	no	no		MGC29949	8.319e-05	no	no	no		MGC16635	9.503e-05	no	no	no
HGAA1	7.97e-05	no	no	no		HLA-F	8.288e-05	no	no	no		RNF79	9.501e-05	no	no	no
UQCR4	7.94e-05	no	no	no		CK067	8.25e-05	no	no	no		KIAA1571	9.44e-05	no	no	no
DMP4	7.88e-05	no	no	no		MC3	8.22e-05	no	no	no		Cwc21	9.409e-05	no	no	no
UBC9	7.84e-05	no	no	no		FAAP	8.206e-05	no	no	no		SELM	9.363e-05	no	no	no
KIAA0734	7.84e-05	no	no	no		NWD1	8.205e-05	no	no	no		C10orf62	9.355e-05	no	no	no
MALAT1	7.76e-05	no	Yes	Yes		FLJ30401	8.194e-05	no	no	no		IMPA2	9.341e-05	no	no	no
MGC24381	7.72e-05	no	no	no		HST17016	8.022e-05	no	no	no		PHKD	9.34e-05	no	no	no
C316G12	7.69e-05	no	no	no		NSD3	8.003e-05	no	no	no		DKFZP761H0421	9.226e-05	no	no	no
ARRDC5	7.68e-05	no	no	no		SKY	7.997e-05	no	no	no		MGC71999	9.204e-05	no	no	no
TDRD14B	7.57e-05	no	no	no		FPS	7.987e-05	no	no	no		SLRR3A	9.199e-05	no	no	no
PPNPB	7.55e-05	no	no	no		C12ORF76	7.986e-05	no	no	no		PSORT	9.106e-05	no	no	no
ET	7.55e-05	no	no	no		C9ORF172	7.985e-05	no	no	no		LPI-PC1	9.075e-05	no	no	no
SIRT7	7.48e-05	no	no	no		TBC1D22A	7.977e-05	no	Yes	no		RNF37	9.073e-05	no	no	no
MGC20149	7.48e-05	no	no	no		AMOG	7.914e-05	no	no	no		SCDO3	8.929e-05	no	no	no
P5C	7.47e-05	no	no	no		PPP1R85	7.909e-05	no	no	no		TSK	8.751e-05	no	no	no
LOC255275	7.39e-05	no	no	no		OR4F4	7.81e-05	no	no	no		C6ORF1	8.72e-05	no	no	no
NOTUM	7.31e-05	no	no	no		MGC2734	7.71e-05	no	no	no		HCCR-2	8.653e-05	no	no	no
UBXN9	7.31e-05	no	no	no		HGLE1	7.694e-05	no	no	no		LDL-PLA2	8.648e-05	no	no	no
SIPL1	7.28e-05	no	no	no		DAND1	7.625e-05	no	no	no		PRELID3B	8.628e-05	no	no	no
DKFZP586G1123	7.26e-05	no	no	no		PRELID4B	7.622e-05	no	no	no		NTN5	8.516e-05	no	no	no
KIAA1875	7.25e-05	no	no	no		LDL-PLA2	7.607e-05	no	no	no		HFH4	8.5e-05	no	no	no
LOC51236	7.25e-05	no	no	no		IHPK2	7.574e-05	no	no	no		SSTR3	8.489e-05	no	no	no
KIAA1833	7.19e-05	no	no	no		LOC728734	7.551e-05	no	no	no		ASPP1	8.366e-05	no	no	no
HL11	7.18e-05	no	no	no		BA319I23	7.516e-05	no	no	no		SIPL1	8.354e-05	no	no	no
FAM227A	7.16e-05	no	no	no		SH3BP3	7.461e-05	no	no	no		HOX3H	8.349e-05	no	no	no
CBY	7.14e-05	no	no	no		CT127	7.453e-05	no	no	no		PPT2-EGFL8	8.346e-05	no	no	no
TOM22	7.08e-05	no	no	no		KIAA1909	7.451e-05	no	no	no		TPS2	8.34e-05	no	no	no
MGC16353	7.07e-05	no	no	no		MGCR1	7.408e-05	no	no	no		VAULT1	8.239e-05	no	no	no
AXOR12	7.07e-05	no	no	no		GURDB	7.408e-05	no	no	no		KIAA0247	8.236e-05	no	no	no
BRIGHT	7.04e-05	no	no	no		ULA-1	7.395e-05	no	no	no		IPO1	8.236e-05	no	no	no
IPI3	7.01e-05	no	no	no		DJ366N23	7.389e-05	no	no	no		CGI-22	8.204e-05	no	no	no
ZNF251	7.01e-05	no	no	no		ACHM4	7.386e-05	no	no	no		CAMK2D	8.128e-05	Yes	Yes	Yes
KOX32	6.99e-05	no	no	no		KIAA0354	7.377e-05	no	no	no		FLJ23637	8.126e-05	no	no	no
RPL8	6.93e-05	no	no	no		YHC1	7.339e-05	no	no	no		LOC51236	8.096e-05	no	no	no
ZNF517	6.9e-05	no	no	no		OSC	7.274e-05	no	no	no		NEUROTACTIN	8.093e-05	no	no	no
MI2-BETA	6.89e-05	no	no	no		ACP	7.26e-05	no	no	no		P3H3	8.078e-05	no	no	no
LPA5	6.87e-05	no	no	no		RRF	7.164e-05	no	no	no		CACNLG	8.043e-05	no	no	no
CT23	6.87e-05	no	no	no		MGC88387	7.138e-05	no	no	no		CMC3	8.04e-05	no	no	no
MY036	6.84e-05	no	no	no		ZNF918	7.117e-05	no	no	no		MFSD3	8.029e-05	no	no	no
NMP4	6.83e-05	no	no	no		GAS11	7.112e-05	no	no	no		LOC100133251	8.01e-05	no	no	no
KIAA0150	6.83e-05	no	no	no		C16ORF33	7.109e-05	no	no	no		MGC126882	7.986e-05	no	no	no
MROH6	6.76e-05	no	no	no		PPP2R5E	7.081e-05	no	no	no		CFC	7.938e-05	no	no	no
PP3856	6.75e-05	no	no	no		ACP5	7.069e-05	no	no	no		ZNT3	7.931e-05	no	no	no
FLJ20897	6.75e-05	no	no	no		CWC26	7.046e-05	no	no	no		FLJ35803	7.89e-05	no	no	no
FLJ13725	6.75e-05	no	no	no		MPF	7.013e-05	no	no	no		BGT-1	7.876e-05	no	no	no
CTCF	6.74e-05	no	no	no		C14orf48	6.992e-05	no	no	no		FMFD1	7.855e-05	no	no	no
NHN1	6.74e-05	no	no	no		CD324	6.984e-05	no	no	no		RNASE13	7.838e-05	no	no	no
FLJ12582	6.73e-05	no	no	no		FLJ25818	6.979e-05	no	no	no		FLJ21675	7.82e-05	no	no	no
GAS11	6.72e-05	no	no	no		MGC133236	6.934e-05	no	no	no		UBC9	7.818e-05	no	no	no
ZNF910	6.71e-05	no	no	no		C1ORF100	6.897e-05	no	no	no		HNRPA2B1	7.798e-05	no	no	no
ADD1	6.67e-05	no	no	no		ZMYND21	6.867e-05	no	no	no		SNRNP110	7.785e-05	no	no	no
TRAP240L	6.67e-05	no	no	no		BCMO	6.861e-05	no	no	no		AMOG	7.784e-05	no	no	no
SAMD4A	6.63e-05	no	Yes	Yes		NR1F1	6.86e-05	no	no	no		BUSTER1	7.776e-05	no	no	no
HS-40	6.6e-05	no	no	no		APOB	6.842e-05	no	no	no		GGT2	7.775e-05	no	no	no
HBZ-T1	6.57e-05	no	no	no		CILD24	6.836e-05	no	no	no		MGC1947	7.766e-05	no	no	no
HBK	6.57e-05	no	no	no		CYP8A1	6.827e-05	no	no	no		KIAA1197	7.764e-05	no	no	no
HBA-T2	6.57e-05	no	no	no		EBBP	6.806e-05	no	no	no		RBCC	7.763e-05	no	no	no
HBA-T3	6.48e-05	no	no	no		MEG2	6.797e-05	no	no	no		FLJ38426	7.714e-05	no	no	no
HBQ	6.47e-05	no	no	no		MDB	6.79e-05	no	no	no		FLJ25357	7.701e-05	no	no	no
CCDC166	6.47e-05	no	no	no		KIAA1175	6.776e-05	no	no	no		ARFL3	7.693e-05	no	no	no
ERK7	6.46e-05	no	no	no		E2F-2	6.756e-05	no	no	no		RH-II/GUB	7.686e-05	no	no	no
FLJ46072	6.45e-05	no	no	no		CENPH	6.746e-05	no	no	no		SLC26A11	7.685e-05	no	no	no
FAM83H-AS1	6.44e-05	no	no	no		SPT6H	6.721e-05	no	no	no		DKFZP566J2046	7.678e-05	no	no	no
IHPK2	6.43e-05	no	no	no		D5S346	6.708e-05	no	no	no		CNB1	7.663e-05	no	no	no
ZMIZ6	6.42e-05	no	no	no		MGC46315	6.675e-05	no	no	no		FLJ36070	7.655e-05	no	no	no
ZNF857A	6.41e-05	no	no	no		C6orf10	6.669e-05	no	no	no		MRPL54	7.646e-05	no	no	no
MEK2	6.41e-05	no	no	no		P20	6.649e-05	no	no	no		FLJ31434	7.645e-05	no	no	no
CREB-H	6.39e-05	no	no	no		GRIA3	6.639e-05	no	Yes	no		PHZ-49	7.645e-05	no	no	no
SIRT6	6.34e-05	no	no	no		DKFZP761G122	6.636e-05	no	no	no		PIP5KIIALPHA	7.644e-05	no	no	no
KIAA1981	6.33e-05	no	no	no		KIAA1518	6.629e-05	no	no	no		KENAE	7.64e-05	no	no	no
RPC11	6.33e-05	no	no	no		Z3CXXC5	6.628e-05	no	no	no		DJ1085F17	7.64e-05	no	no	no
C16ORF33	6.31e-05	no	no	no		HSLE1	6.594e-05	no	no	no		KIAA1515	7.633e-05	no	no	no
DIST1	6.3e-05	no	no	no		NPM2	6.59e-05	no	no	no		JTK3	7.631e-05	no	no	no
MDG	6.28e-05	no	no	no		EDF-1	6.59e-05	no	no	no		WNT11	7.621e-05	no	no	no
PPP1R49	6.28e-05	no	no	no		TB4Y	6.589e-05	no	no	no		HSXIAPAF1	7.609e-05	no	no	no
MAAT1	6.27e-05	no	no	no		DKFZP434C1714	6.582e-05	no	no	no		ISCS	7.609e-05	no	no	no
M83	6.27e-05	no	no	no		BIN3	6.58e-05	no	no	no		GSK3A	7.605e-05	no	no	no
NDPKD	6.25e-05	no	no	no		ZSCAN46	6.571e-05	no	no	no		CTRP15	7.599e-05	no	no	no
ARL18	6.22e-05	no	no	no		CSNB2B	6.551e-05	no	no	no		ABCD-2	7.588e-05	no	no	no
GPATCH6	6.19e-05	no	no	no		MGR	6.543e-05	no	no	no		CP107	7.578e-05	no	no	no
LIME	6.18e-05	no	no	no		RP4-622L5	6.543e-05	no	no	no		LMNB1	7.578e-05	no	no	no
SI-1-2-19	6.18e-05	no	no	no		MGC1947	6.536e-05	no	no	no		CD156C	7.575e-05	no	no	no
MGC45931	6.17e-05	no	no	no		PAR-1C	6.532e-05	no	no	no		RGS14	7.574e-05	no	no	no
CRSP100	6.17e-05	no	no	no		MYBPH	6.532e-05	no	no	no		FLJ11896	7.573e-05	no	no	no
NR1A1	6.16e-05	no	no	no		FLJ12697	6.531e-05	no	no	no		ZNF404	7.565e-05	no	no	no
RAB26	6.15e-05	no	no	no		MGC2616	6.523e-05	no	no	no		Cad	7.561e-05	no	no	no
MGC7807	6.15e-05	no	no	no		AC004997	6.523e-05	no	no	no		KIAA0397	7.559e-05	no	no	no
ANKS5A	6.13e-05	no	no	no		CHRNB4	6.513e-05	no	no	no		BHLHA27	7.55e-05	no	no	no
FLJ11266	6.13e-05	no	no	no		C-P4HALPHA(I)	6.512e-05	no	no	no		MGC133236	7.55e-05	no	no	no
NUDT4P1	6.12e-05	no	no	no		MID49	6.51e-05	no	no	no		FLJ21945	7.544e-05	no	no	no
PRKAG1	6.11e-05	no	no	no		LOC93622	6.506e-05	no	no	no		PPP1R144	7.543e-05	no	no	no
CAGL114	6.11e-05	no	no	no		SRG	6.489e-05	no	no	no		MGC33202	7.529e-05	no	no	no
FLJ25797	6.1e-05	no	no	no		KIAA0252	6.478e-05	no	no	no		DKFZP434K114	7.529e-05	no	no	no
MGC35145	6.09e-05	no	no	no		RNF95	6.478e-05	no	no	no		SUA1	7.524e-05	no	no	no
MNAR	6.08e-05	no	no	no		KIAA0895	6.477e-05	no	no	no		HP1HS-GAMMA	7.52e-05	no	no	no
DKFZP686L0365	6.07e-05	no	no	no		P66ALPHA	6.475e-05	no	no	no		FLJ10928	7.519e-05	no	no	no
MGC88387	6.06e-05	no	no	no		KIAA0295	6.475e-05	no	no	no		FLJ00391	7.518e-05	no	no	no
SRPSOX	6.04e-05	no	no	no		KIAA0173	6.474e-05	no	no	no		RPMS25	7.518e-05	no	no	no
DKFZP434N127	6.03e-05	no	no	no		XTP12	6.472e-05	no	no	no		DKFZP434K2235	7.516e-05	no	no	no
TM4SF5	6.01e-05	no	no	no		C-ABL	6.47e-05	no	no	no		MGC32056	7.515e-05	no	no	no
VMO1	6.01e-05	no	no	no		LERK-8	6.464e-05	no	no	no		Gem	7.515e-05	no	no	no
GLTPD2	6.01e-05	no	no	no		VNUT	6.46e-05	no	no	no		SDS22	7.51e-05	no	no	no
PPP5	6.01e-05	no	no	no		KV2	6.454e-05	no	no	no		FLJ39565	7.509e-05	no	no	no
MSH-R	6.01e-05	no	no	no		BCL7B	6.448e-05	no	no	no		FRMD2	7.496e-05	no	no	no
CFEOM3A	6.01e-05	no	no	no		SECTM1	6.446e-05	no	no	no		STT3-A	7.496e-05	no	no	no
FLJ20186	6e-05	no	no	no		CGI-65	6.443e-05	no	no	no		ROR2	7.493e-05	no	Yes	Yes
CH	5.99e-05	no	no	no		SRC3	6.443e-05	no	no	no		EREG1	7.486e-05	no	no	no
CAH1	5.99e-05	no	no	no		MGC23908	6.441e-05	no	no	no		ZGRF6	7.463e-05	no	no	no
MGC23244	5.98e-05	no	no	no		P24A	6.439e-05	no	no	no		P202	7.463e-05	no	no	no
MIR1	5.98e-05	no	no	no		YJR010C-A	6.432e-05	no	no	no		IFI-6-16	7.46e-05	no	no	no
BKS	5.97e-05	no	no	no		NMIG	6.431e-05	no	no	no		ZNF520	7.455e-05	no	no	no
FLJ14981	5.96e-05	no	no	no		GLUN2A	6.425e-05	no	no	no		SM-D2	7.453e-05	no	no	no
KIAA0590	5.94e-05	no	no	no		DFNA64	6.422e-05	no	no	no		ASB6	7.453e-05	no	no	no
CRAMP1L	5.94e-05	no	no	no		MGC24381	6.421e-05	no	no	no		BHLHF42	7.449e-05	no	no	no
MONA	5.94e-05	no	no	no		DKFZP686P24239	6.412e-05	no	no	no		PATE	7.448e-05	no	no	no
CES2A1	5.939e-05	no	no	no		LEO1	6.407e-05	no	no	no		DJ551D2	7.438e-05	no	no	no
TP53I2	5.939e-05	no	no	no		SRP40	6.405e-05	no	no	no		MGC22916	7.435e-05	no	no	no
OR17-40	5.938e-05	no	no	no		TNDM2	6.404e-05	no	no	no		CI-39K	7.429e-05	no	no	no
HK1	5.938e-05	no	no	no		CPLA2-GAMMA	6.404e-05	no	no	no		PPP1R85	7.428e-05	no	no	no
DUX4L24	5.938e-05	no	no	no		Vma6	6.402e-05	no	no	no		PP1ALPHA	7.423e-05	no	no	no
VSIG10	5.937e-05	no	no	no		KAPPA-200	6.4e-05	no	no	no		MEKK13	7.419e-05	no	no	no
TMEM228	5.937e-05	no	no	no		MGC119201	6.393e-05	no	no	no		TCC52	7.413e-05	no	no	no
RAD21L	5.936e-05	no	no	no		FLJ40191	6.392e-05	no	no	no		C22ORF4	7.406e-05	no	no	no
CDW199	5.936e-05	no	no	no		GNB3	6.391e-05	no	no	no		NC2-ALPHA	7.394e-05	no	no	no
CLM9	5.936e-05	no	no	no		OATP3A1	6.391e-05	no	no	no		CGI-91	7.394e-05	no	no	no
3OST2	5.935e-05	no	no	no		BDAG1	6.389e-05	no	no	no		DYT18	7.388e-05	no	no	no
DJ686N3	5.935e-05	no	no	no		KIAA1754L	6.387e-05	no	no	no		LSIRF	7.385e-05	no	no	no
LERK-8	5.933e-05	no	no	no		FLJ36951	6.386e-05	no	no	no		TIMD1	7.383e-05	no	no	no
HPX42B	5.932e-05	no	no	no		SAA2	6.383e-05	no	no	no		MGC34749	7.383e-05	no	no	no
ARID3C	5.931e-05	no	no	no		PT1	6.379e-05	no	no	no		NF-YC	7.378e-05	no	no	no
B19	5.929e-05	no	no	no		KIAA0038	6.376e-05	no	no	no		CENP-35	7.376e-05	no	no	no
KIAA0733	5.927e-05	no	no	no		MGC15396	6.373e-05	no	no	no		ECS1	7.375e-05	no	no	no
NLIIF	5.927e-05	no	no	no		B99	6.37e-05	no	no	no		CAPN15	7.366e-05	no	no	no
CKLIK	5.925e-05	no	no	no		RAB24	6.368e-05	no	no	no		MGC16353	7.363e-05	no	no	no
RPN4	5.924e-05	no	no	no		C11ORF24	6.359e-05	no	no	no		MFAP1	7.36e-05	no	no	no
MGC99595	5.923e-05	no	no	no		MGC50721	6.357e-05	no	no	no		FLJ10738	7.358e-05	no	no	no
FLJ14486	5.921e-05	no	no	no		AFG1	6.347e-05	no	no	no		WRB	7.355e-05	no	no	no
HLA-DP1B	5.92e-05	no	no	no		IMP-1	6.346e-05	no	no	no		PHI-1	7.354e-05	no	no	no
NEK5	5.917e-05	no	no	no		PTS1R	6.346e-05	no	no	no		MACAM1	7.349e-05	no	no	no
FLJ20041	5.916e-05	no	no	no		UBC12	6.342e-05	no	no	no		DKFZP761D081	7.348e-05	no	no	no
SPHK	5.915e-05	no	no	no		KIAA1594	6.337e-05	no	no	no		NBC3	7.341e-05	no	no	no
ALPHA-MPP	5.914e-05	no	no	no		CHOP	6.335e-05	no	no	no		CENPH	7.34e-05	no	no	no
PPP1R69	5.912e-05	no	no	no		LPEAT1	6.335e-05	no	no	no		B7323	7.338e-05	no	no	no
CTRB2	5.912e-05	no	no	no		HTGL	6.335e-05	no	no	no		HIGM4	7.336e-05	no	no	no
HMUDG	5.911e-05	no	no	no		CORONIN-2	6.334e-05	no	no	no		S100BETA	7.335e-05	no	no	no
SNX10	5.91e-05	no	no	no		HIGM4	6.331e-05	no	no	no		FLJ40162	7.335e-05	no	no	no
FAAP20	5.91e-05	no	no	no		PATZ	6.329e-05	no	no	no		GTF2H1	7.334e-05	no	no	no
CEF1	5.91e-05	no	no	no		DUSP13B	6.328e-05	no	no	no		DJ744I24	7.333e-05	no	no	no
Vma6	5.91e-05	no	no	no		INSSA3	6.328e-05	no	no	no		GAPIII	7.331e-05	no	no	no
P2U	5.909e-05	no	no	no		FLJ12851	6.327e-05	no	no	no		MGC32686	7.33e-05	no	no	no
RNASE7	5.905e-05	no	no	no		COX11	6.326e-05	no	no	no		PGPI	7.329e-05	no	no	no
NSL3	5.904e-05	no	no	no		FLJ44952	6.322e-05	no	no	no		EP58	7.326e-05	no	no	no
CAMK2D	5.903e-05	Yes	Yes	Yes		ARL10A	6.322e-05	no	no	no		IP3R3	7.319e-05	no	no	no
NET33	5.903e-05	no	no	no		KIAA0678	6.319e-05	no	no	no		BA424I5	7.301e-05	no	no	no
SDPI	5.902e-05	no	no	no		MGC126569	6.315e-05	no	no	no		MGC44505	7.296e-05	no	no	no
KLHL16	5.902e-05	no	no	no		CD225	6.311e-05	no	no	no		CBY	7.294e-05	no	no	no
PAQR11	5.902e-05	no	no	no		MGC19764	6.311e-05	no	no	no		SF3B145	7.289e-05	no	no	no
MGC35570	5.901e-05	no	no	no		MSE1	6.304e-05	no	no	no		MGC138391	7.289e-05	no	no	no
ADCA	5.899e-05	no	no	no		HSBP1	6.295e-05	no	no	no		TC21	7.286e-05	no	no	no
NCS2	5.899e-05	no	no	no		UNC45	6.295e-05	no	no	no		ZNEU1	7.285e-05	no	no	no
Q0310	5.898e-05	no	no	no		OPHN1L1	6.289e-05	no	no	no		MP11	7.283e-05	no	no	no
FLJ12827	5.896e-05	no	no	no		RNA5SP366	6.284e-05	no	Yes	no		COL24A1	7.281e-05	no	no	no
HUBSPECV	5.896e-05	no	no	no		GAPIII	6.283e-05	no	no	no		MGC12972	7.28e-05	no	no	no
FLJ36951	5.895e-05	no	no	no		CT23	6.282e-05	no	no	no		OAZ1	7.28e-05	no	Yes	no
ORP6	5.894e-05	no	no	no		BETA5I	6.279e-05	no	no	no		MGC4267	7.278e-05	no	no	no
MGC52498	5.893e-05	no	no	no		PGR25	6.276e-05	no	no	no		PI31	7.276e-05	no	no	no
KIAA1753	5.891e-05	no	no	no		RAL	6.274e-05	no	no	no		KIAA1439	7.275e-05	no	no	no
ZNF206	5.891e-05	no	no	no		Med24	6.274e-05	no	no	no		C11ORF85	7.274e-05	no	no	no
RP44	5.89e-05	no	no	no		BHLHE77	6.273e-05	no	no	no		HST19447	7.271e-05	no	no	no
RRT2	5.89e-05	no	no	no		FLJ41197	6.273e-05	no	no	no		PASHA	7.27e-05	no	no	no
MGC4631	5.888e-05	no	no	no		PHZ-49	6.268e-05	no	no	no		KIAA1257	7.266e-05	no	no	no
MGC119201	5.888e-05	no	no	no		FKHRL1P1	6.265e-05	no	no	no		CAVA	7.265e-05	no	no	no
ACTN1	5.887e-05	no	no	no		PRO1472	6.263e-05	no	no	no		RPTPA	7.265e-05	no	no	no
AEG-1	5.887e-05	no	no	no		FRMD2	6.259e-05	no	no	no		EST123147	7.264e-05	no	no	no
FCNM	5.886e-05	no	no	no		TINAG	6.257e-05	no	no	no		RCOR-1	7.263e-05	no	no	no
KIAA1822	5.886e-05	no	no	no		DIC2	6.255e-05	no	no	no		FLJ12443	7.256e-05	no	no	no
TIMD1	5.885e-05	no	no	no		AQP12	6.243e-05	no	no	no		KIAA1673	7.254e-05	no	no	no
RNF94	5.885e-05	no	no	no		CNOL	6.242e-05	no	no	no		DAP-1	7.254e-05	no	no	no
MGC45386	5.884e-05	no	no	no		CHCHD3	6.239e-05	no	Yes	no		TAIFD	7.254e-05	no	no	no
LSIRF	5.884e-05	no	no	no		ASCT2	6.239e-05	no	no	no		FLJ11305	7.249e-05	no	no	no
FLJ10738	5.884e-05	no	no	no		ETS2	6.237e-05	no	no	no		KAP10	7.241e-05	no	no	no
MASPIN	5.883e-05	no	no	no		ALPP	6.235e-05	no	no	no		FTCD	7.238e-05	no	no	no
MGC33951	5.882e-05	no	no	no		PDA2	6.233e-05	no	no	no		RNF87	7.236e-05	no	no	no
PINT1	5.881e-05	no	no	no		HNRNP-R	6.23e-05	no	no	no		C14ORF3	7.235e-05	no	no	no
PEPD	5.88e-05	no	no	no		FLJ10665	6.229e-05	no	no	no		ATPIB	7.233e-05	no	no	no
CGR11	5.88e-05	no	no	no		KIAA0102	6.225e-05	no	no	no		DAND1	7.23e-05	no	no	no
CTSW	5.879e-05	no	no	no		JBTS12	6.222e-05	no	no	no		C6ORF120	7.229e-05	no	no	no
MGC12966	5.878e-05	no	no	no		ML7	6.222e-05	no	no	no		L38	7.224e-05	no	no	no
SPAX5	5.877e-05	no	no	no		P3H3	6.219e-05	no	no	no		CPNE1	7.221e-05	no	no	no
ZNF221	5.877e-05	no	no	no		GPRV53	6.217e-05	no	no	no		SPEC2	7.218e-05	no	no	no
C7orf31	5.876e-05	no	no	no		KIAA0338	6.216e-05	no	no	no		LUMA	7.218e-05	no	no	no
FMFD1	5.876e-05	no	no	no		PRAC	6.215e-05	no	no	no		FLJ00337	7.216e-05	no	no	no
NEDD3	5.875e-05	no	no	no		KIFC3	6.215e-05	no	no	no		C16ORF11	7.214e-05	no	no	no
SYD	5.874e-05	no	no	no		KIAA0361	6.215e-05	no	no	no		HPS8	7.209e-05	no	no	no
ADPRHL1	5.873e-05	no	no	no		WAFL	6.214e-05	no	no	no		CT156	7.204e-05	no	no	no
MGC29736	5.869e-05	no	no	no		DKFZP434I0121	6.214e-05	no	no	no		OTOSP	7.203e-05	no	no	no
PGR25	5.869e-05	no	no	no		CGI-120	6.212e-05	no	no	no		TLDC1	7.201e-05	no	no	no
FLJ10634	5.868e-05	no	no	no		MGC:39976	6.209e-05	no	no	no		IRLB	7.201e-05	no	no	no
CKS2	5.867e-05	no	no	no		C6ORF120	6.201e-05	no	no	no		FLJ20094	7.2e-05	no	no	no
ACTN3	5.866e-05	no	no	no		PME	6.201e-05	no	no	no		DAPPER3	7.2e-05	no	no	no
SEC12	5.865e-05	no	no	no		EPIPL1	6.198e-05	no	no	no		KIAA0775	7.199e-05	no	no	no
NTT5	5.865e-05	no	no	no		FAM189A2	6.198e-05	no	Yes	no		DKFZP686E01200	7.196e-05	no	no	no
C19ORF38	5.864e-05	no	no	no		BNIP3A	6.195e-05	no	no	no		FLJ20452	7.195e-05	no	no	no
TSP-EAR	5.864e-05	no	no	no		FLJ35454	6.194e-05	no	no	no		GALNAC-T16	7.189e-05	no	no	no
BA119F7	5.864e-05	no	no	no		DJ824F16	6.194e-05	no	no	no		NOP132	7.186e-05	no	no	no
FGF23	5.863e-05	no	no	no		HMGXB1	6.193e-05	no	no	no		FLJ39091	7.186e-05	no	no	no
KIAA1014	5.862e-05	no	no	no		CCDC24	6.19e-05	no	no	no		SPL	7.185e-05	no	no	no
NET60	5.862e-05	no	no	no		FLJ12827	6.188e-05	no	no	no		C6orf10	7.185e-05	no	no	no
AC022389	5.86e-05	no	no	no		FLJ31529	6.187e-05	no	no	no		DJ328E19	7.171e-05	no	no	no
MAN1B	5.857e-05	no	no	no		KIAA0969	6.186e-05	no	no	no		PTS1R	7.169e-05	no	no	no
ZFP13	5.857e-05	no	no	no		REMP	6.186e-05	no	no	no		CLDN6	7.166e-05	no	no	no
RNF21	5.856e-05	no	no	no		AEBP2	6.183e-05	no	Yes	no		B3T5	7.161e-05	no	no	no
BAF	5.856e-05	no	no	no		ENT4	6.181e-05	no	no	no		PGD	7.159e-05	no	no	no
HSBP1	5.856e-05	no	no	no		PIF96	6.181e-05	no	no	no		CSP-GAMMA	7.159e-05	no	no	no
GOLGA6D	5.855e-05	no	no	no		NY-CO-3	6.18e-05	no	no	no		HSBG	7.159e-05	no	no	no
YCR016W	5.854e-05	no	no	no		INPP5G	6.18e-05	no	no	no		RPN14	7.155e-05	no	no	no
UNC112C	5.852e-05	no	no	no		RAP55B	6.177e-05	no	no	no		NLIIF	7.154e-05	no	no	no
IFNABR	5.852e-05	no	no	no		HST169	6.175e-05	no	no	no		HST19883	7.154e-05	no	no	no
MGCR1	5.85e-05	no	no	no		CRBPIII	6.175e-05	no	no	no		CCRK	7.149e-05	no	no	no
SCGB1C2	5.848e-05	no	no	no		ZFGF5	6.174e-05	no	no	no		PIR51	7.148e-05	no	no	no
PATZ	5.848e-05	no	no	no		CA7	6.171e-05	no	no	no		FKHRL1P1	7.14e-05	no	no	no
FLJ00391	5.848e-05	no	no	no		C14ORF37	6.171e-05	no	no	no		DKFZP727G131	7.139e-05	no	no	no
FLJ21439	5.847e-05	no	no	no		DCTN-22	6.17e-05	no	no	no		LTBP1	7.138e-05	no	Yes	no
RNA5SP264	5.847e-05	no	Yes	no		CD146	6.168e-05	no	no	no		CCYC	7.134e-05	no	no	no
SID6-1512	5.847e-05	no	no	no		DJ534B8	6.166e-05	no	no	no		PLA2G4F/Z	7.133e-05	no	no	no
CTDP1	5.846e-05	no	no	no		SGK495	6.166e-05	no	no	no		PP2CALPHA	7.133e-05	no	no	no
MGC34749	5.842e-05	no	no	no		FLJ31037	6.165e-05	no	no	no		MRVLDC3	7.131e-05	no	no	no
SP140L	5.841e-05	no	no	no		FLJ13187	6.163e-05	no	no	no		ARIP2	7.128e-05	no	no	no
ZIP7	5.84e-05	no	no	no		MGC9414	6.163e-05	no	no	no		STARD7	7.126e-05	no	no	no
SPC	5.839e-05	no	no	no		PRO3113	6.159e-05	no	no	no		MGC2198	7.124e-05	no	no	no
ZNF431	5.839e-05	no	Yes	Yes		SPERIOLIN	6.157e-05	no	no	no		HU-2	7.123e-05	no	no	no
AD4BP	5.838e-05	no	no	no		STIP	6.15e-05	no	no	no		MGC14381	7.116e-05	no	no	no
RTEL1-TNFRSF6B	5.837e-05	no	no	no		HDMCP	6.15e-05	no	no	no		SCGB1C2	7.113e-05	no	no	no
DKFZP434I0121	5.837e-05	no	no	no		MGC17303	6.149e-05	no	no	no		PSDC	7.109e-05	no	no	no
CORONIN-2	5.837e-05	no	no	no		MYHC-IIB	6.148e-05	no	no	no		ATG16B	7.109e-05	no	no	no
CPX-IV	5.835e-05	no	no	no		AIRAP	6.147e-05	no	no	no		NHE3	7.109e-05	no	no	no
NFAT1	5.831e-05	no	no	no		RAD	6.146e-05	no	no	no		BTBD29	7.109e-05	no	no	no
EREG1	5.828e-05	no	no	no		MGC20410	6.144e-05	no	no	no		DSC92	7.106e-05	no	no	no
EAN57	5.828e-05	no	no	no		IIS	6.139e-05	no	no	no		ELP70	7.103e-05	no	no	no
FLJ33071	5.828e-05	no	no	no		ETMOD	6.136e-05	no	no	no		HSPC176	7.101e-05	no	no	no
IPO1	5.828e-05	no	no	no		lnc-SNRPN-1	6.134e-05	no	Yes	no		C1ORF226	7.098e-05	no	no	no
PRP-B	5.828e-05	no	no	no		MGC71974	6.133e-05	no	no	no		TDT-N	7.096e-05	no	no	no
CCDC182	5.827e-05	no	no	no		HISCA	6.133e-05	no	no	no		FLJ22519	7.096e-05	no	no	no
ECGF1	5.826e-05	no	no	no		FLJ10786	6.133e-05	no	no	no		CIP29	7.095e-05	no	no	no
HC90	5.826e-05	no	no	no		KIAA1514	6.131e-05	no	no	no		MDC1C	7.095e-05	no	no	no
P110D	5.825e-05	no	no	no		RIS2	6.13e-05	no	no	no		TPSB2	7.094e-05	no	no	no
E2F-2	5.824e-05	no	no	no		C14orf142	6.13e-05	no	no	no		C12ORF76	7.094e-05	no	no	no
MGC31967	5.823e-05	no	no	no		INMT-FAM188B	6.129e-05	no	no	no		OR4F5	7.094e-05	no	no	no
ZCCHC20	5.823e-05	no	no	no		KIAA1207	6.126e-05	no	no	no		SH3BP4	7.093e-05	no	no	no
IRKK	5.822e-05	no	no	no		MY036	6.124e-05	no	no	no		ARL12	7.091e-05	no	no	no
BA269C23	5.821e-05	no	no	no		SANCHO	6.123e-05	no	no	no		MGC15749	7.091e-05	no	no	no
EBBP	5.82e-05	no	no	no		CEMENTOIN	6.119e-05	no	no	no		SRPSOX	7.09e-05	no	no	no
MEKK9	5.82e-05	no	no	no		DAP	6.119e-05	no	no	no		FLJ14464	7.089e-05	no	no	no
BDPL	5.819e-05	no	no	no		Q0310	6.118e-05	no	no	no		MGC42174	7.086e-05	no	no	no
CT111	5.819e-05	no	no	no		NKG2-F	6.117e-05	no	no	no		FLJ12697	7.085e-05	no	no	no
CKMM	5.818e-05	no	no	no		MGC16491	6.117e-05	no	no	no		ASCT2	7.085e-05	no	no	no
LOC100288332	5.817e-05	no	no	no		LOC100288332	6.117e-05	no	no	no		SERPINE3	7.083e-05	no	no	no
L38	5.816e-05	no	no	no		EPM	6.114e-05	no	no	no		SH3PXD3C	7.081e-05	no	no	no
RDX12	5.814e-05	no	no	no		SMTN	6.112e-05	no	no	no		STAF	7.071e-05	no	no	no
DAPPER3	5.813e-05	no	no	no		GPR73A	6.112e-05	no	no	no		FKBP-13	7.069e-05	no	no	no
FLJ10998	5.813e-05	no	no	no		NGALNAC-T1	6.112e-05	no	no	no		HERF1	7.065e-05	no	no	no
NTPDASE-5	5.809e-05	no	no	no		GSK3A	6.111e-05	no	no	no		HATPL	7.065e-05	no	no	no
DJ530I15	5.809e-05	no	no	no		HSXIAPAF1	6.105e-05	no	no	no		NUDT4P1	7.064e-05	no	no	no
p130	5.808e-05	no	no	no		KIAA0320	6.105e-05	no	no	no		NOD3	7.064e-05	no	no	no
FLJ10844	5.803e-05	no	no	no		ARPP	6.105e-05	no	no	no		MGC2601	7.064e-05	no	no	no
ZUD	5.803e-05	no	no	no		bHLHe23	6.1e-05	no	no	no		ZFGF5	7.059e-05	no	no	no
ZNEU1	5.802e-05	no	no	no		MGC61716	6.098e-05	no	no	no		HUGL-1	7.055e-05	no	no	no
KH2	5.802e-05	no	no	no		HMGIY	6.097e-05	no	no	no		FLJ90694	7.054e-05	no	no	no
FLJ00086	5.802e-05	no	no	no		FLJ20059	6.096e-05	no	no	no		MPHOSPH6	7.053e-05	no	no	no
C16ORF11	5.801e-05	no	no	no		HNRNPCL3	6.095e-05	no	no	no		DJ402G11	7.053e-05	no	no	no
DKFZP570I0164	5.801e-05	no	no	no		CBY3	6.095e-05	no	no	no		SF3B8	7.051e-05	no	no	no
PPP1R144	5.801e-05	no	no	no		CT120	6.095e-05	no	no	no		D22S674	7.05e-05	no	no	no
VIP1	5.8e-05	no	no	no		MITF	6.095e-05	no	Yes	no		KIAA0053	7.05e-05	no	no	no
RAIN	5.8e-05	no	no	no		CTAK	6.094e-05	no	no	no		SPBC98	7.05e-05	no	no	no
RAB3A	5.797e-05	no	no	no		CT34	6.089e-05	no	no	no		BHLHA6	7.043e-05	no	no	no
DPY19L2P1	5.797e-05	no	Yes	no		MGC125836	6.089e-05	no	no	no		DOC2BL	7.041e-05	no	no	no
MGC14386	5.797e-05	no	no	no		CRAMP1L	6.085e-05	no	no	no		LAT-2	7.041e-05	no	no	no
FLJ13222	5.794e-05	no	no	no		KIAA1286	6.085e-05	no	no	no		C6ST1	7.04e-05	no	no	no
GAL3ST1	5.792e-05	no	no	no		ACAD2	6.083e-05	no	no	no		LPEAT2	7.039e-05	no	no	no
BM600-100KDA	5.792e-05	no	no	no		H-YPT3	6.083e-05	no	no	no		GAL3ST3	7.038e-05	no	no	no
TCF7L1	5.792e-05	no	no	no		SPH1	6.082e-05	no	no	no		SDR9C6	7.035e-05	no	no	no
GFI1B	5.791e-05	no	no	no		KIAA0925	6.082e-05	no	no	no		DJ579N16	7.025e-05	no	no	no
SCDO3	5.791e-05	no	no	no		HCP-6	6.081e-05	no	no	no		UBAP1L	7.024e-05	no	no	no
TLCD1	5.79e-05	no	no	no		FLJ11200	6.081e-05	no	no	no		CT82	7.021e-05	no	no	no
FLJ43374	5.789e-05	no	no	no		KIAA1055	6.081e-05	no	no	no		Z3CXXC5	7.021e-05	no	no	no
FLJ44952	5.789e-05	no	no	no		MGC39265	6.081e-05	no	no	no		U1SNRNPBP	7.019e-05	no	no	no
KIAA1691	5.787e-05	no	no	no		MGC111222	6.08e-05	no	no	no		BK	7.018e-05	no	no	no
FLJ20898	5.786e-05	no	no	no		DJ261G23	6.08e-05	no	no	no		UBR3	7.013e-05	no	Yes	Yes
MAN1	5.786e-05	no	no	no		NOTUM	6.079e-05	no	no	no		KIAA1658	7.011e-05	no	no	no
MGC11134	5.785e-05	no	no	no		F10	6.079e-05	no	no	no		BCDIN3D	7.011e-05	no	no	no
BYSL	5.783e-05	no	no	no		FLJ32452	6.078e-05	no	no	no		PSL2	7.009e-05	no	no	no
NF1	5.781e-05	no	no	no		ACSF3	6.078e-05	no	no	no		ACTN3	7.009e-05	no	no	no
P21CIP1/WAF1	5.78e-05	no	no	no		PGR26	6.076e-05	no	no	no		RENR	7.009e-05	no	no	no
FLJ13703	5.779e-05	no	no	no		S25	6.076e-05	no	no	no		TAFII20	7.008e-05	no	no	no
C14ORF42	5.778e-05	no	no	no		MGC22916	6.07e-05	no	no	no		MGC125836	7.006e-05	no	no	no
KAP1	5.775e-05	no	no	no		FLJ37871	6.064e-05	no	no	no		BTN8	7.003e-05	no	no	no
DKFZP434K046	5.775e-05	no	no	no		CD102	6.064e-05	no	no	no		HCA66	7.001e-05	no	no	no
ACY2	5.775e-05	no	no	no		RTN3	6.061e-05	no	Yes	Yes		ACTR1A	7.001e-05	no	no	no
FLJ22257	5.774e-05	no	no	no		KIAA0828	6.059e-05	no	no	no		ARL7	7.001e-05	no	no	no
CGI-120	5.773e-05	no	no	no		IPI3	6.056e-05	no	no	no		FLJ23878	7.001e-05	no	no	no
OR4F12	5.773e-05	no	no	no		HSP73	6.055e-05	no	no	no		Cdc42GAP	7e-05	no	no	no
MGC71764	5.772e-05	no	no	no		SHCC	6.053e-05	no	no	no		CFAP50	6.998e-05	no	no	no
FLJ42707	5.772e-05	no	no	no		SLIM	6.053e-05	no	no	no		LOC123688	6.995e-05	no	no	no
RGSL2	5.771e-05	no	no	no		RC6-1	6.052e-05	no	no	no		SPINLW1-WFDC6	6.994e-05	no	no	no
NBP35	5.77e-05	no	no	no		NSMF	6.051e-05	no	no	no		P50BP	6.991e-05	no	no	no
ERK5	5.77e-05	no	no	no		FLJ90806	6.049e-05	no	no	no		C9ORF131	6.99e-05	no	no	no
TM7XN1	5.768e-05	no	no	no		DJ998H6	6.046e-05	no	no	no		BA387M24	6.986e-05	no	no	no
KIAA0381	5.767e-05	no	no	no		NARR	6.045e-05	no	no	no		SAP45	6.981e-05	no	no	no
PTI	5.766e-05	no	no	no		RP47	6.045e-05	no	no	no		NPP7	6.98e-05	no	no	no
ANTI-ELASTASE	5.766e-05	no	no	no		WNT3A	6.045e-05	no	no	no		FLJ44618	6.979e-05	no	no	no
HSPC203	5.765e-05	no	no	no		FLJ90167	6.045e-05	no	no	no		LPLUNC6	6.979e-05	no	no	no
C17ORF29	5.765e-05	no	no	no		LUC7	6.041e-05	no	no	no		KIAA0043	6.978e-05	no	no	no
CLIP-170	5.765e-05	no	no	no		PHOSPHO2-KLHL23	6.039e-05	no	no	no		FLJ37528	6.978e-05	no	no	no
FLJ22519	5.764e-05	no	no	no		SGK269	6.039e-05	no	no	no		HUBSPECV	6.978e-05	no	no	no
RNG105	5.764e-05	no	no	no		MGC19907	6.038e-05	no	no	no		KIAA1023	6.976e-05	no	no	no
KIAA1791	5.764e-05	no	no	no		SPLUNC3	6.037e-05	no	no	no		CWC26	6.975e-05	no	no	no
ZC2HC6B	5.762e-05	no	no	no		FLJ10193	6.037e-05	no	no	no		KRTE	6.975e-05	no	no	no
MGC5469	5.762e-05	no	no	no		CYTOHESIN-3	6.037e-05	no	no	no		FLJ20695	6.974e-05	no	no	no
SPR1	5.761e-05	no	no	no		MGC71999	6.036e-05	no	no	no		DKFZP666G247	6.974e-05	no	no	no
REGR	5.759e-05	no	no	no		HST19883	6.035e-05	no	no	no		PLEKHA4	6.969e-05	no	no	no
ETAA16	5.758e-05	no	no	no		UBXN2C	6.035e-05	no	no	no		D15WSU75E	6.968e-05	no	no	no
LOC57722	5.757e-05	no	no	no		LPLUNC2	6.034e-05	no	no	no		PP6-ARS-C	6.963e-05	no	no	no
XP1	5.757e-05	no	no	no		HYAK3-2	6.033e-05	no	no	no		GLP2R	6.963e-05	no	no	no
VPS16	5.757e-05	no	no	no		C14ORF152	6.031e-05	no	no	no		H2AX	6.961e-05	no	no	no
NCIE2	5.756e-05	no	no	no		DJ744I24	6.03e-05	no	no	no		C14ORF152	6.961e-05	no	no	no
FLJ22583	5.756e-05	no	no	no		FLJ20898	6.03e-05	no	no	no		GRG6	6.96e-05	no	no	no
BA514O12	5.756e-05	no	no	no		MNAR	6.029e-05	no	no	no		FKBP16	6.96e-05	no	no	no
EPG4	5.756e-05	no	no	no		HCCS-1	6.027e-05	no	no	no		MTHFD	6.959e-05	no	no	no
SDR9C4	5.756e-05	no	no	no		ANKS5A	6.025e-05	no	no	no		DPY19L2P1	6.956e-05	no	Yes	no
BA444G7	5.755e-05	no	no	no		NOP132	6.024e-05	no	no	no		FAH	6.954e-05	no	no	no
TPM1	5.755e-05	Yes	Yes	Yes		VEGFL	6.024e-05	no	no	no		UNCX4	6.953e-05	no	no	no
DKFZP762M186	5.755e-05	no	no	no		DKFZP762M186	6.023e-05	no	no	no		CBX6	6.949e-05	no	no	no
BA319I23	5.754e-05	no	no	no		RAB3IL1	6.021e-05	no	no	no		LPAAT-GAMMA	6.948e-05	no	no	no
FLJ30473	5.753e-05	no	no	no		C22ORF15	6.021e-05	no	no	no		IFNABR	6.948e-05	no	no	no
FLJ39737	5.753e-05	no	no	no		FLJ20424	6.019e-05	no	no	no		SDPI	6.948e-05	no	no	no
KIAA1164	5.753e-05	no	no	no		PEP8B	6.018e-05	no	no	no		C3ORF13	6.946e-05	no	no	no
PCBP3	5.752e-05	no	no	no		TST	6.015e-05	no	no	no		HDGFRP2	6.946e-05	no	no	no
VWA5C	5.752e-05	no	no	no		NLF2	6.015e-05	no	no	no		BETA4GALT-V	6.945e-05	no	no	no
ISOT	5.752e-05	no	no	no		FLJ46346	6.012e-05	no	no	no		BA113O24	6.94e-05	no	no	no
SVCT1	5.75e-05	no	no	no		FZD2	6.006e-05	no	no	no		BIMP1	6.939e-05	no	no	no
SH3PXD3C	5.749e-05	no	no	no		HAS3	6.004e-05	no	no	no		BA541N10	6.938e-05	no	no	no
CT156	5.749e-05	no	no	no		CMS	6.004e-05	no	no	no		C2ORF72	6.938e-05	no	no	no
KIAA0233	5.748e-05	no	no	no		NPP7	6.002e-05	no	no	no		N143	6.936e-05	no	no	no
TAIL1	5.748e-05	no	no	no		OR17-135	6.002e-05	no	no	no		EVA	6.935e-05	no	no	no
TYRO5	5.748e-05	no	no	no		LOC728637	6e-05	no	no	no		SCLIP	6.931e-05	no	no	no
TRDN	5.746e-05	no	Yes	Yes		CES1A2	6e-05	no	no	no		MGC2560	6.93e-05	no	no	no
CT71	5.745e-05	no	no	no		P5C	5.999e-05	no	no	no		RC6-1	6.926e-05	no	no	no
NY-REN-2	5.745e-05	no	no	no		MGC14386	5.999e-05	no	no	no		CNC1	6.924e-05	no	no	no
FLJ13855	5.744e-05	no	no	no		ATP5E	5.998e-05	no	no	no		DJ543J19	6.924e-05	no	no	no
FLJ13287	5.743e-05	no	no	no		FLJ10357	5.997e-05	no	no	no		KMT1D	6.923e-05	no	no	no
DJ310O13	5.742e-05	no	no	no		MGC35145	5.996e-05	no	no	no		HPH3	6.921e-05	no	no	no
KIAA1197	5.741e-05	no	no	no		PI4K230	5.994e-05	no	no	no		TOSO	6.919e-05	no	no	no
BAF45A	5.74e-05	no	no	no		ST20-MTHFS	5.993e-05	no	no	no		HISCA	6.919e-05	no	no	no
HESR3	5.74e-05	no	no	no		CMH10	5.992e-05	no	no	no		HRNBP3	6.918e-05	no	no	no
ERBA-BETA	5.74e-05	no	no	no		CHC1L	5.992e-05	no	no	no		USP12L1	6.916e-05	no	no	no
PDE9A	5.74e-05	no	no	no		CT65	5.992e-05	no	no	no		GPR25	6.915e-05	no	no	no
C-P4HALPHA(I)	5.739e-05	no	no	no		LPLUNC6	5.99e-05	no	no	no		MC3	6.914e-05	no	no	no
DAP-1	5.738e-05	no	no	no		P126	5.99e-05	no	no	no		ACOX3	6.913e-05	no	Yes	no
MPHOSPH6	5.737e-05	no	no	no		L27	5.987e-05	no	no	no		OR4F11P	6.911e-05	no	no	no
PEA3	5.737e-05	no	no	no		DHRC	5.986e-05	no	no	no		FLJ40235	6.91e-05	no	no	no
KRTAP18-10	5.735e-05	no	no	no		C8ORF13	5.986e-05	no	no	no		BAF45A	6.904e-05	no	no	no
LIPRIN	5.735e-05	no	no	no		KIAA1601	5.984e-05	no	no	no		SCRL	6.904e-05	no	no	no
FLJ31638	5.735e-05	no	no	no		SPINO	5.983e-05	no	no	no		FLJ10844	6.903e-05	no	no	no
MGC33329	5.733e-05	no	no	no		ESRRG	5.98e-05	no	Yes	Yes		GAS11	6.9e-05	no	no	no
C14ORF164	5.732e-05	no	no	no		KIAA1887	5.979e-05	no	no	no		NTAN1	6.898e-05	no	no	no
ACCB	5.73e-05	no	no	no		BA424I5	5.973e-05	no	no	no		GOLIM5	6.896e-05	no	no	no
CCP3	5.729e-05	no	no	no		URGCP-MRPS24	5.971e-05	no	no	no		FBXL6	6.894e-05	no	no	no
C6ORF145	5.728e-05	no	no	no		CUL1	5.97e-05	no	no	no		CENH3	6.894e-05	no	no	no
C11ORF85	5.728e-05	no	no	no		UBP41	5.968e-05	no	no	no		KIAA0551	6.894e-05	no	no	no
CDC14B	5.727e-05	no	Yes	Yes		FBP3	5.966e-05	no	no	no		FLJ25409	6.894e-05	no	no	no
KRM2	5.727e-05	no	no	no		TXLNGX	5.966e-05	no	no	no		MGC4856	6.894e-05	no	no	no
KMT2G	5.727e-05	no	no	no		NET27	5.965e-05	no	no	no		HEL-127	6.893e-05	no	no	no
PRO1280	5.726e-05	no	no	no		CHET8	5.965e-05	no	no	no		ALPHA-RLC	6.891e-05	no	no	no
NCRNA00254	5.724e-05	no	no	no		PTGES3L-AARSD1	5.965e-05	no	no	no		ABCX	6.89e-05	no	no	no
C14ORF3	5.723e-05	no	no	no		MGC4126	5.962e-05	no	no	no		PLCD4	6.89e-05	no	no	no
KIAA1887	5.723e-05	no	no	no		DJ351K20	5.962e-05	no	no	no		SDR21C2	6.89e-05	no	no	no
DKFZP434K0427	5.721e-05	no	no	no		PAX2	5.962e-05	no	no	no		FLJ12851	6.889e-05	no	no	no
FAM77A	5.72e-05	no	no	no		HMPS	5.962e-05	no	no	no		PGAM-M	6.889e-05	no	no	no
PPP1R141	5.719e-05	no	no	no		OMP85	5.961e-05	no	no	no		CD105	6.889e-05	no	no	no
C2ORF72	5.719e-05	no	no	no		RPN4	5.96e-05	no	no	no		AZ3B	6.888e-05	no	no	no
FLJ10665	5.718e-05	no	no	no		EPLIN	5.958e-05	no	no	no		CILD12	6.888e-05	no	no	no
ZIR1	5.717e-05	no	no	no		FLJ34512	5.954e-05	no	no	no		BA514O12	6.886e-05	no	no	no
MTRNR2L8	5.716e-05	no	no	no		JMJD7	5.95e-05	no	no	no		ARF1	6.885e-05	no	no	no
C5ORF45	5.716e-05	no	no	no		ONECUT3	5.95e-05	no	no	no		HOMER-2A	6.884e-05	no	no	no
GOLGA6B	5.716e-05	no	no	no		P44ERK1	5.948e-05	no	no	no		DHC1	6.884e-05	no	no	no
IRF5	5.715e-05	no	no	no		DKFZP586D1822	5.948e-05	no	no	no		F12	6.88e-05	no	no	no
MACROH2A2	5.714e-05	no	no	no		PHKD	5.944e-05	no	no	no		ERG-3	6.88e-05	no	no	no
BGT-1	5.712e-05	no	no	no		GAL3ST3	5.944e-05	no	no	no		PGY4	6.88e-05	no	no	no
GR	5.711e-05	no	no	no		DOC2BL	5.943e-05	no	no	no		HOXB13	6.88e-05	no	no	no
CCS	5.711e-05	no	no	no		SMAP-8	5.943e-05	no	no	no		KIAA0473	6.879e-05	no	no	no
REV-ERBAALPHA	5.711e-05	no	no	no		SSB-2	5.943e-05	no	no	no		SPHK2	6.874e-05	no	no	no
PPP1R28	5.71e-05	no	no	no		D21S2056E	5.942e-05	no	no	no		C17ORF29	6.873e-05	no	no	no
RNF95	5.71e-05	no	no	no		FMT1	5.941e-05	no	no	no		S100AL	6.871e-05	no	no	no
FYVE-DSP1	5.708e-05	no	no	no		FLJ37870	5.94e-05	no	no	no		RYR3	6.87e-05	no	no	no
BDB1	5.705e-05	no	no	no		HDGFRP3	5.939e-05	no	no	no		MGC13138	6.868e-05	no	no	no
FAM205CP	5.705e-05	no	no	no		NET11	5.938e-05	no	no	no		FAM77A	6.866e-05	no	no	no
RAB24	5.705e-05	no	no	no		FLJ11749	5.935e-05	no	no	no		ZAKI-4	6.866e-05	no	no	no
MCP3	5.705e-05	no	no	no		DJ551D2	5.935e-05	no	no	no		NET3	6.864e-05	no	no	no
SPLUNC3	5.705e-05	no	no	no		ERB	5.935e-05	no	no	no		LNOX1	6.861e-05	no	no	no
MGC129552	5.703e-05	no	no	no		GPR14	5.934e-05	no	no	no		UTP30	6.861e-05	no	no	no
RYR2	5.702e-05	no	Yes	Yes		SOX1	5.933e-05	no	no	no		SEC53	6.86e-05	no	no	no
OMP	5.702e-05	no	no	no		KAP1	5.933e-05	no	no	no		ATPO	6.854e-05	no	no	no
P2Y11	5.701e-05	no	no	no		SYPH1	5.933e-05	no	no	no		DJ1118M15	6.853e-05	no	no	no
TWA1	5.701e-05	no	no	no		SPBC98	5.932e-05	no	no	no		INHBA	6.853e-05	no	no	no
MENA	5.7e-05	no	no	no		KMT5C	5.932e-05	no	no	no		AK1	6.853e-05	no	no	no
EPS15R	5.7e-05	no	no	no		PGR5	5.932e-05	no	no	no		KH2	6.851e-05	no	no	no
TIP41	5.7e-05	no	no	no		M83	5.931e-05	no	no	no		MGC119016	6.851e-05	no	no	no
DKFZP434H2215	5.699e-05	no	no	no		MYOCD	5.93e-05	no	Yes	no		OR13-66	6.85e-05	no	no	no
P518	5.698e-05	no	no	no		FLJ10849	5.93e-05	no	no	no		PHOSPHO2-KLHL23	6.849e-05	no	no	no
ATP6N1D	5.698e-05	no	no	no		RANBP13	5.929e-05	no	no	no		FLJ22435	6.845e-05	no	no	no
FLJ00337	5.698e-05	no	no	no		RLN1	5.928e-05	no	no	no		CPX-III	6.844e-05	no	no	no
CD45-AP	5.697e-05	no	no	no		RP48	5.927e-05	no	no	no		BHLHE78	6.841e-05	no	no	no
VID24	5.696e-05	no	no	no		MGC50811	5.926e-05	no	no	no		FLJ00225	6.84e-05	no	no	no
MGC2821	5.696e-05	no	no	no		HERG2	5.926e-05	no	no	no		NM23-H8	6.839e-05	no	no	no
DJ34B21	5.695e-05	no	no	no		MG29	5.925e-05	no	no	no		NSRD2	6.839e-05	no	no	no
ASL	5.694e-05	no	no	no		PPNPB	5.924e-05	no	no	no		HOX3B	6.838e-05	no	no	no
ZNF828	5.693e-05	no	no	no		MST158	5.924e-05	no	no	no		POM121A	6.838e-05	no	no	no
NET29	5.693e-05	no	no	no		FAAP20	5.922e-05	no	no	no		NAPTB	6.836e-05	no	no	no
PGY4	5.692e-05	no	no	no		FLJ20897	5.922e-05	no	no	no		WSTF	6.836e-05	no	no	no
PPP1R53	5.691e-05	no	no	no		WAP8	5.922e-05	no	no	no		RPC11	6.836e-05	no	no	no
FKHRL1P1	5.691e-05	no	no	no		NUDT20	5.922e-05	no	no	no		FLJ25410	6.833e-05	no	no	no
lnc-SNRPN-1	5.69e-05	no	Yes	no		CRABPI	5.922e-05	no	no	no		OSC	6.833e-05	no	no	no
TGP	5.69e-05	no	no	no		CFD1	5.921e-05	no	no	no		FINGER1	6.833e-05	no	no	no
PRELID3A	5.69e-05	no	no	no		C7ORF57	5.92e-05	no	no	no		FEZ1	6.831e-05	no	no	no
KIAA0970	5.689e-05	no	no	no		FAM45A	5.919e-05	no	no	no		DJ50J22	6.828e-05	no	no	no
ZSCAN37	5.688e-05	no	no	no		TECH	5.918e-05	no	no	no		NR1A1	6.826e-05	no	no	no
LOC440348	5.688e-05	no	no	no		ATG8E	5.918e-05	no	no	no		1-8D	6.825e-05	no	no	no
UBXN2C	5.688e-05	no	no	no		EPILIGRIN	5.917e-05	no	no	no		HST19268	6.824e-05	no	no	no
FLJ25765	5.688e-05	no	no	no		FLJ46061	5.917e-05	no	no	no		FPGT-TNNI3K	6.823e-05	no	Yes	no
KIAA1655	5.687e-05	no	no	no		RAB12	5.911e-05	no	no	no		NKX4-1	6.821e-05	no	no	no
DP5	5.687e-05	no	no	no		HCCR-2	5.91e-05	no	no	no		KASH5	6.82e-05	no	no	no
RNF109	5.686e-05	no	no	no		RAB3IP	5.908e-05	no	Yes	no		NET40	6.819e-05	no	no	no
BK-2	5.686e-05	no	no	no		PS20	5.908e-05	no	no	no		APITD1-CORT	6.818e-05	no	no	no
NJMU-R1	5.684e-05	no	no	no		DKFZP313L0121	5.908e-05	no	no	no		N27C7-4	6.816e-05	no	no	no
CTRB	5.683e-05	no	no	no		VPS28	5.907e-05	no	no	no		SERZ1	6.816e-05	no	no	no
SLC42A3	5.68e-05	no	no	no		SLC39A5	5.904e-05	no	no	no		SFXN2	6.816e-05	no	no	no
CADHERIN	5.679e-05	no	no	no		KIAA1367	5.903e-05	no	no	no		MOSP	6.815e-05	no	no	no
SPI-1	5.678e-05	no	no	no		FAP133	5.903e-05	no	no	no		FLJ35989	6.814e-05	no	no	no
SCRL	5.676e-05	no	no	no		CPSF1	5.902e-05	no	no	no		SPERIOLIN	6.813e-05	no	no	no
P202	5.676e-05	no	no	no		SLC9A1BP	5.9e-05	no	no	no		HSPE-39	6.811e-05	no	no	no
LDLRAD2	5.676e-05	no	no	no		FLJ25008	5.9e-05	no	no	no		ATP-BL	6.81e-05	no	no	no
C10ORF120	5.674e-05	no	no	no		V7	5.898e-05	no	no	no		RNF66	6.81e-05	no	no	no
DJ824F16	5.673e-05	no	no	no		PHI-1	5.895e-05	no	no	no		EPILIGRIN	6.81e-05	no	no	no
RNF202	5.669e-05	no	no	no		CHRNA10	5.894e-05	no	no	no		MGC5469	6.809e-05	no	no	no
CAR4	5.669e-05	no	no	no		IDH2	5.894e-05	no	no	no		NKD1	6.809e-05	no	no	no
PIG3	5.668e-05	no	no	no		C-P4HALPHA(III)	5.893e-05	no	no	no		GDE2	6.793e-05	no	no	no
FLJ38426	5.668e-05	no	no	no		EN-7	5.893e-05	no	no	no		CD351	6.788e-05	no	no	no
CBX6	5.667e-05	no	no	no		CILD13	5.89e-05	no	no	no		LCA16	6.788e-05	no	no	no
NMELV	5.667e-05	no	no	no		GC-UNC45	5.89e-05	no	no	no		TBX13	6.788e-05	no	no	no
ACAD8	5.667e-05	no	no	no		KIAA0753	5.889e-05	no	no	no		CI-51K	6.785e-05	no	no	no
BHLHA27	5.667e-05	no	no	no		FLJ13289	5.886e-05	no	no	no		FLJ90566	6.784e-05	no	no	no
ACP5	5.666e-05	no	no	no		P518	5.884e-05	no	no	no		NF1	6.784e-05	no	no	no
UTP30	5.665e-05	no	no	no		SPLUNC2	5.884e-05	no	no	no		FLJ90517	6.783e-05	no	no	no
PLA2G4F/Z	5.665e-05	no	no	no		SSH3BP2	5.883e-05	no	no	no		ZIP7	6.781e-05	no	no	no
SH120	5.664e-05	no	no	no		BTBD23	5.883e-05	no	no	no		MGC2695	6.78e-05	no	no	no
CI-51K	5.663e-05	no	no	no		MXB	5.88e-05	no	no	no		CLR19	6.78e-05	no	no	no
1A1-3B	5.663e-05	no	no	no		DKFZP686E01200	5.878e-05	no	no	no		K35	6.779e-05	no	no	no
MUNC13-1	5.662e-05	no	no	no		P28ING5	5.877e-05	no	no	no		SYPH1	6.778e-05	no	no	no
HISCA	5.662e-05	no	no	no		CLM2	5.876e-05	no	no	no		ERBA-BETA	6.778e-05	no	no	no
B7323	5.661e-05	no	no	no		ZNF198L1	5.876e-05	no	no	no		HCCS1	6.778e-05	no	no	no
CGI-22	5.661e-05	no	no	no		HSD24	5.875e-05	no	no	no		HSPC105	6.776e-05	no	no	no
CFAP89	5.661e-05	no	no	no		PP3856	5.874e-05	no	no	no		FLJ10458	6.773e-05	no	no	no
MGC126572	5.66e-05	no	no	no		C21ORF78	5.873e-05	no	no	no		MGC88387	6.771e-05	no	no	no
RAP30	5.659e-05	no	no	no		ATP5G2	5.873e-05	no	no	no		KIAA1291	6.77e-05	no	no	no
FLJ32452	5.659e-05	no	no	no		HK1	5.872e-05	no	no	no		CCDC85C	6.77e-05	no	no	no
FLJ37528	5.659e-05	no	no	no		QSK	5.871e-05	no	no	no		DAGK3	6.77e-05	no	no	no
TRIM40	5.658e-05	no	no	no		H2AX	5.868e-05	no	no	no		ARCD1	6.77e-05	no	no	no
SPINLW1-WFDC6	5.656e-05	no	no	no		RBEL1	5.868e-05	no	no	no		WTH3DI	6.769e-05	no	no	no
KAPPA-200	5.655e-05	no	no	no		MONA	5.867e-05	no	no	no		FLJ12876	6.768e-05	no	no	no
PRO3113	5.655e-05	no	no	no		KIAA1824	5.866e-05	no	no	no		SRSF1	6.765e-05	no	Yes	no
HSLE1	5.654e-05	no	no	no		VAULT1	5.866e-05	no	no	no		RNF83	6.765e-05	no	no	no
DTNB	5.653e-05	no	no	no		ZSCAN37	5.865e-05	no	no	no		PTPSTEP	6.765e-05	no	no	no
PPL8	5.653e-05	no	no	no		BMP14	5.864e-05	no	no	no		FIGLER2	6.764e-05	no	no	no
GRG6	5.651e-05	no	no	no		FLJ12760	5.864e-05	no	no	no		TRAP3	6.764e-05	no	no	no
NP55	5.651e-05	no	no	no		KIAA0775	5.862e-05	no	no	no		E3KARP	6.763e-05	no	no	no
ATP5JG	5.647e-05	no	no	no		ZUD	5.861e-05	no	no	no		MGC11352	6.763e-05	no	no	no
FLJ12851	5.647e-05	no	no	no		ALDH8	5.861e-05	no	no	no		AQP2L	6.763e-05	no	no	no
HSXIAPAF1	5.646e-05	no	no	no		NPD007	5.86e-05	no	no	no		PTI	6.763e-05	no	no	no
FLJ10769	5.646e-05	no	no	no		CATSPER	5.859e-05	no	no	no		DKFZP762M186	6.763e-05	no	no	no
KLG	5.644e-05	no	no	no		RREB1	5.855e-05	no	no	no		MGC17624	6.763e-05	no	no	no
MUC17	5.643e-05	no	no	no		SLX2B	5.855e-05	no	no	no		GLOD1	6.761e-05	no	no	no
AMLCR1	5.642e-05	no	no	no		RP43	5.855e-05	no	no	no		MGC24381	6.761e-05	no	no	no
PRELID3B	5.64e-05	no	no	no		CRYBA2	5.853e-05	no	no	no		GLOD2	6.76e-05	no	no	no
CTR1	5.64e-05	no	no	no		FLJ25053	5.85e-05	no	no	no		TIM17A	6.758e-05	no	no	no
POLGA	5.639e-05	no	no	no		FLJ33884	5.85e-05	no	no	no		LOC374920	6.756e-05	no	no	no
RNU1-11P	5.639e-05	no	Yes	no		RNU1-67P	5.849e-05	no	Yes	no		CROC-1B	6.756e-05	no	no	no
CT151	5.639e-05	no	no	no		OR7E24Q	5.846e-05	no	no	no		NFAT1	6.756e-05	no	no	no
CSDC1	5.638e-05	no	no	no		DLX1	5.846e-05	no	no	no		MANA	6.756e-05	no	no	no
GIYD1	5.638e-05	no	no	no		DERPC	5.845e-05	no	no	no		GEM	6.756e-05	no	no	no
GALIG	5.637e-05	no	no	no		CCDC182	5.845e-05	no	no	no		NFAR-1	6.755e-05	no	no	no
RCOR-1	5.637e-05	no	no	no		PEP8A	5.844e-05	no	no	no		DAPR	6.753e-05	no	no	no
C1ORF106	5.636e-05	no	no	no		SPEC2	5.842e-05	no	no	no		MGC117216	6.751e-05	no	no	no
FLJ14917	5.635e-05	no	no	no		C17ORF26	5.842e-05	no	no	no		LSR68	6.751e-05	no	no	no
MGC1348	5.634e-05	no	no	no		S100P	5.841e-05	no	no	no		SCC4	6.748e-05	no	no	no
ESRRG	5.634e-05	no	Yes	Yes		FLJ35841	5.841e-05	no	no	no		KIAA1599	6.746e-05	no	no	no
P101	5.633e-05	no	no	no		LOC51236	5.84e-05	no	no	no		NET22	6.746e-05	no	no	no
RET1	5.633e-05	no	no	no		STO1	5.839e-05	no	no	no		FAM22H	6.744e-05	no	no	no
BART1	5.633e-05	no	no	no		CPA	5.839e-05	no	no	no		TAN1	6.744e-05	no	no	no
CTSX	5.632e-05	no	no	no		PEBP2A3	5.837e-05	no	no	no		MGC40397	6.743e-05	no	no	no
PARVG	5.632e-05	no	no	no		Rpn2	5.837e-05	no	no	no		FLJ25818	6.743e-05	no	no	no
CDH28	5.632e-05	no	no	no		KLHL9	5.835e-05	no	Yes	no		AWMS2	6.74e-05	no	no	no
GPATC8	5.631e-05	no	no	no		NCIE2	5.833e-05	no	no	no		PPP1R124	6.74e-05	no	no	no
SELO	5.629e-05	no	no	no		FSAP105	5.833e-05	no	no	no		TAIL1	6.74e-05	no	no	no
YJEFN2	5.629e-05	no	no	no		HL14	5.833e-05	no	no	no		GPR1	6.739e-05	no	no	no
P28ING5	5.629e-05	no	no	no		BA514O12	5.833e-05	no	no	no		NET27	6.738e-05	no	no	no
P66ALPHA	5.628e-05	no	no	no		DJ266L20	5.833e-05	no	no	no		FLJ11190	6.738e-05	no	no	no
KIAA1439	5.628e-05	no	no	no		SLC42A3	5.829e-05	no	no	no		BHLHE82	6.738e-05	no	no	no
ERK4	5.628e-05	no	no	no		HPE4	5.829e-05	no	no	no		BETA4GAL-T2	6.736e-05	no	no	no
BCL7B	5.628e-05	no	no	no		FLJ23459	5.828e-05	no	no	no		MGC50811	6.736e-05	no	no	no
MGC111763	5.627e-05	no	no	no		FLJ37990	5.828e-05	no	no	no		FALDH	6.735e-05	no	no	no
ZSCAN8	5.626e-05	no	no	no		BA113O24	5.827e-05	no	no	no		CD122	6.733e-05	no	no	no
FZD2	5.626e-05	no	no	no		MOSP	5.823e-05	no	no	no		CCDC44	6.73e-05	no	no	no
SC1	5.625e-05	no	no	no		NPPC	5.822e-05	no	no	no		MANSC2	6.73e-05	no	no	no
CD159A	5.625e-05	no	no	no		MRPL54	5.821e-05	no	no	no		MB1	6.729e-05	no	no	no
FLJ38628	5.624e-05	no	no	no		LCA16	5.82e-05	no	no	no		BTBD31	6.726e-05	no	no	no
OFC7	5.624e-05	no	no	no		C21ORF258	5.82e-05	no	no	no		CD349	6.726e-05	no	no	no
FLJ10700	5.624e-05	no	no	no		KIAA1257	5.819e-05	no	no	no		FLJ10036	6.725e-05	no	no	no
MGC17986	5.623e-05	no	no	no		KIAA1667	5.818e-05	no	no	no		CCP2	6.723e-05	no	no	no
BETA5I	5.623e-05	no	no	no		TAFI	5.818e-05	no	no	no		NBND3	6.723e-05	no	no	no
BFZB	5.623e-05	no	no	no		KIAA1822	5.816e-05	no	no	no		IFITMD4	6.723e-05	no	no	no
BHLHB25	5.623e-05	no	no	no		C21ORF83	5.815e-05	no	no	no		EMSY	6.72e-05	no	no	no
PLGP1	5.623e-05	no	no	no		SPC	5.814e-05	no	no	no		FIAF	6.72e-05	no	no	no
L27	5.623e-05	no	no	no		FLJ14627	5.814e-05	no	no	no		MGC149868	6.719e-05	no	no	no
CLN10	5.623e-05	no	no	no		DORZ1	5.813e-05	no	no	no		JNKK2	6.718e-05	no	no	no
CT53	5.623e-05	no	no	no		SC1	5.813e-05	no	no	no		CT151	6.715e-05	no	no	no
DCTN-50	5.622e-05	no	no	no		DJ579N16	5.813e-05	no	no	no		TP53I2	6.713e-05	no	no	no
MPZL3	5.621e-05	no	no	no		ACTN1	5.812e-05	no	no	no		BS69	6.713e-05	no	no	no
MGC4639	5.621e-05	no	no	no		BAF57	5.812e-05	no	no	no		FLJ32809	6.711e-05	no	no	no
ARC105	5.62e-05	no	no	no		eIF3c	5.812e-05	no	no	no		MTRNR2L1	6.709e-05	no	Yes	no
SIMRP7	5.62e-05	no	no	no		MGAT5	5.81e-05	no	Yes	no		RBM12B	6.708e-05	no	no	no
INPP5	5.618e-05	no	no	no		MGC12966	5.808e-05	no	no	no		CENP-29	6.708e-05	no	no	no
IFT70	5.618e-05	no	no	no		SEC14L6	5.808e-05	no	no	no		FLJ21281	6.706e-05	no	no	no
KIAA1515	5.618e-05	no	no	no		BA261N11	5.807e-05	no	no	no		IPI3	6.705e-05	no	no	no
KIAA0053	5.617e-05	no	no	no		SC5D	5.806e-05	no	no	no		IKKA	6.703e-05	no	no	no
PRED77	5.616e-05	no	no	no		LOC51491	5.806e-05	no	no	no		SRC3	6.699e-05	no	no	no
TGFBR3L	5.616e-05	no	no	no		SURF2	5.806e-05	no	no	no		WNT7B	6.699e-05	no	no	no
DFNA64	5.614e-05	no	no	no		PPHA	5.806e-05	no	no	no		NY-REN-28	6.698e-05	no	no	no
TSARG4	5.614e-05	no	no	no		ZC2HC6B	5.806e-05	no	no	no		MAAT1	6.698e-05	no	no	no
IGLL5	5.614e-05	no	no	no		BBC1	5.806e-05	no	no	no		FLJ38984	6.696e-05	no	no	no
UBALD1	5.613e-05	no	no	no		ASB7	5.805e-05	no	no	no		FLJ20623	6.694e-05	no	no	no
MGC15749	5.613e-05	no	no	no		TNNT2	5.804e-05	no	Yes	no		KALRN	6.693e-05	Yes	no	no
CLEC15B	5.612e-05	no	no	no		ASB6	5.804e-05	no	no	no		FLJ25720	6.693e-05	no	no	no
OR4F11P	5.612e-05	no	no	no		NET23	5.8e-05	no	no	no		ST20-MTHFS	6.691e-05	no	no	no
MDC1C	5.612e-05	no	no	no		CTCF	5.799e-05	no	no	no		FLJ20733	6.691e-05	no	no	no
PDIA16	5.611e-05	no	no	no		FLJ40908	5.796e-05	no	no	no		KIAA1753	6.69e-05	no	no	no
FLJ11749	5.611e-05	no	no	no		SEC34	5.795e-05	no	no	no		NPTX1	6.689e-05	no	no	no
DKFZP434I1117	5.608e-05	no	no	no		SLC11	5.795e-05	no	no	no		CKB11	6.689e-05	no	no	no
KIAA0969	5.608e-05	no	no	no		PDLIM5	5.794e-05	Yes	no	no		PPP1R139	6.685e-05	no	no	no
FLJ20699	5.608e-05	no	no	no		IDDM22	5.794e-05	no	no	no		KCNIP2	6.684e-05	Yes	no	no
KIAA0247	5.607e-05	no	no	no		FLJ35767	5.793e-05	no	no	no		P53R2	6.684e-05	no	no	no
HRAS1	5.607e-05	no	no	no		CLU2	5.792e-05	no	no	no		GAT3	6.684e-05	no	no	no
GRC3	5.606e-05	no	no	no		WSTF	5.791e-05	no	no	no		SKY	6.681e-05	no	no	no
BA500C11	5.606e-05	no	no	no		NBP16	5.791e-05	no	no	no		KIAA0295	6.679e-05	no	no	no
MTCP1NB	5.606e-05	no	no	no		F2	5.79e-05	no	no	no		MYBPH	6.679e-05	no	no	no
BCA3	5.604e-05	no	no	no		BYE1	5.79e-05	no	no	no		MEG2	6.676e-05	no	no	no
C3ORF18	5.602e-05	no	no	no		ZADT	5.789e-05	no	no	no		FLJ20671	6.675e-05	no	no	no
BA113O24	5.601e-05	no	no	no		KIAA1833	5.789e-05	no	no	no		D21S2056E	6.673e-05	no	no	no
C15ORF26	5.601e-05	no	no	no		FLJ13258	5.789e-05	no	no	no		LIP4	6.673e-05	no	no	no
HURP	5.601e-05	no	no	no		CPX-IV	5.789e-05	no	no	no		SC5D	6.673e-05	no	no	no
AUH	5.599e-05	no	no	no		NEK5	5.788e-05	no	no	no		DRASIC	6.671e-05	no	no	no
FLJ23841	5.598e-05	no	no	no		SML1	5.788e-05	no	no	no		BA500C11	6.668e-05	no	no	no
lnc-RALYL-1	5.594e-05	no	Yes	no		LIV-1	5.786e-05	no	no	no		MST093	6.666e-05	no	no	no
C1ORF226	5.594e-05	no	no	no		NTN1L	5.786e-05	no	no	no		CGI-152	6.666e-05	no	no	no
CYPL1	5.594e-05	no	no	no		D15WSU75E	5.785e-05	no	no	no		FLJ25477	6.666e-05	no	no	no
TGFA	5.593e-05	no	no	no		NET3	5.785e-05	no	no	no		BHLHE5	6.665e-05	no	no	no
ZNF851	5.592e-05	no	no	no		HURP	5.783e-05	no	no	no		SWAN-1	6.665e-05	no	no	no
FAG	5.591e-05	no	no	no		BCMP101	5.783e-05	no	no	no		MGC71974	6.664e-05	no	no	no
FLJ42195	5.589e-05	no	no	no		MGC33417	5.783e-05	no	no	no		DPPII	6.661e-05	no	no	no
TDRP2	5.588e-05	no	no	no		FLJ21945	5.779e-05	no	no	no		JMJD7-PLA2G4B	6.66e-05	no	no	no
KIAA0071	5.588e-05	no	no	no		TCAB1	5.779e-05	no	no	no		VNUT	6.659e-05	no	no	no
HLHX2	5.585e-05	no	no	no		PLIN	5.778e-05	no	no	no		FLJ10357	6.656e-05	no	no	no
BNF1	5.585e-05	no	no	no		KIAA0410	5.777e-05	no	no	no		BA395P17	6.655e-05	no	no	no
GALNR	5.583e-05	no	no	no		OR1I1Q	5.777e-05	no	no	no		NM15	6.654e-05	no	no	no
DKFZP43N024	5.583e-05	no	no	no		HST17025	5.776e-05	no	no	no		RNF95	6.653e-05	no	no	no
FSAP35	5.583e-05	no	no	no		IP	5.776e-05	no	no	no		PRICKLE1	6.651e-05	no	Yes	no
CaBP3	5.581e-05	no	no	no		DJ836N17	5.774e-05	no	no	no		FLJ12634	6.65e-05	no	no	no
HDGFRP2	5.581e-05	no	no	no		INO80Q	5.774e-05	no	no	no		SMG-10	6.649e-05	no	no	no
MGC189743	5.58e-05	no	no	no		MGC15563	5.772e-05	no	no	no		KAP17	6.648e-05	no	no	no
A-SCID	5.578e-05	no	no	no		GAS1	5.772e-05	no	no	no		NDR1	6.646e-05	no	no	no
DJ579N16	5.578e-05	no	no	no		BHLHA39	5.771e-05	no	no	no		BDPL	6.646e-05	no	no	no
RNF147	5.577e-05	no	no	no		DIST1	5.768e-05	no	no	no		GPRK6	6.645e-05	no	no	no
WS9-14	5.577e-05	no	no	no		BETA5T	5.768e-05	no	no	no		MGC3165	6.645e-05	no	no	no
PAM14	5.576e-05	no	no	no		FLJ45459	5.768e-05	no	no	no		KIAA1968	6.644e-05	no	no	no
PPP1R85	5.574e-05	no	no	no		MINT3	5.767e-05	no	no	no		C11ORF95	6.64e-05	no	no	no
GSE1	5.574e-05	no	Yes	Yes		CKLIK	5.765e-05	no	no	no		FAP133	6.64e-05	no	no	no
PSORT	5.573e-05	no	no	no		FLJ22435	5.764e-05	no	no	no		HIGIRK2	6.639e-05	no	no	no
FLJ20417	5.571e-05	no	no	no		JBTS13	5.764e-05	no	no	no		BETA5I	6.638e-05	no	no	no
FLJ22692	5.571e-05	no	no	no		RP-A	5.763e-05	no	no	no		HCA88	6.638e-05	no	no	no
PDZD7B	5.57e-05	no	no	no		FMFD1	5.762e-05	no	no	no		SEMA6D	6.636e-05	Yes	no	no
MGC39650	5.57e-05	no	no	no		VPS33A	5.761e-05	no	no	no		ZNF854	6.636e-05	no	no	no
PPP1R96	5.57e-05	no	no	no		elk2	5.761e-05	no	no	no		AGPAT8	6.636e-05	no	no	no
MGC13010	5.57e-05	no	no	no		FLJ14917	5.76e-05	no	no	no		GR	6.635e-05	no	no	no
STG	5.569e-05	no	no	no		NIM3	5.759e-05	no	no	no		EDEN-BP	6.635e-05	no	no	no
GNB1	5.567e-05	no	no	no		KAT12	5.757e-05	no	no	no		SRP40	6.633e-05	no	no	no
C1orf151-NBL1	5.567e-05	no	no	no		DKFZP761H039	5.755e-05	no	no	no		FLJ20186	6.633e-05	no	no	no
CHGN	5.567e-05	no	no	no		KIP	5.754e-05	no	no	no		S25	6.631e-05	no	no	no
DKFZP586L0724	5.566e-05	no	no	no		MGC79402	5.752e-05	no	no	no		GLUK3	6.629e-05	no	no	no
TIGAR	5.564e-05	no	no	no		ZIR1	5.75e-05	no	no	no		IFITM10	6.628e-05	no	no	no
PALM2	5.564e-05	no	Yes	no		KUA	5.748e-05	no	no	no		MDN	6.628e-05	no	no	no
PHZ-67	5.564e-05	no	no	no		SH3BP4	5.748e-05	no	no	no		DKFZP434F195	6.626e-05	no	no	no
FLJ36890	5.563e-05	no	no	no		MLL1A	5.748e-05	no	no	no		TGP	6.625e-05	no	no	no
MGC75360	5.562e-05	no	no	no		ML8	5.747e-05	no	no	no		DKFZP434K0427	6.625e-05	no	no	no
ES18	5.562e-05	no	no	no		PGR13	5.746e-05	no	no	no		KIAA1754L	6.624e-05	no	no	no
KIAA0925	5.562e-05	no	no	no		BXLBV68	5.746e-05	no	no	no		FLJ36748	6.623e-05	no	no	no
APO-3	5.561e-05	no	no	no		SLC2C	5.745e-05	no	no	no		FLJ39626	6.621e-05	no	no	no
HSPH2	5.559e-05	no	no	no		FLJ10815	5.745e-05	no	no	no		AD4BP	6.62e-05	no	no	no
TTC9A	5.558e-05	no	no	no		OR13-66	5.744e-05	no	no	no		DFNB36	6.618e-05	no	no	no
RBM20	5.558e-05	no	Yes	Yes		FLJ23637	5.744e-05	no	no	no		MGC22487	6.616e-05	no	no	no
FLJ40244	5.558e-05	no	no	no		ZIP67	5.743e-05	no	no	no		SOGA2	6.616e-05	no	no	no
BHLHE82	5.557e-05	no	no	no		ATP6GL	5.743e-05	no	no	no		RNASE7	6.615e-05	no	no	no
NTAL	5.557e-05	no	no	no		LPEAT2	5.743e-05	no	no	no		SITPEC	6.614e-05	no	no	no
CT120	5.556e-05	no	no	no		CLDN9	5.741e-05	no	no	no		HPLH2	6.611e-05	no	no	no
FLJ39565	5.556e-05	no	no	no		FLJ10547	5.74e-05	no	no	no		EPIPL1	6.611e-05	no	no	no
TAF(II)43	5.555e-05	no	no	no		PCMT1	5.738e-05	no	no	no		SBK	6.611e-05	no	no	no
FREAC4	5.555e-05	no	no	no		7-60	5.736e-05	no	no	no		L18	6.611e-05	no	no	no
KIAA1824	5.553e-05	no	no	no		YEATS1	5.736e-05	no	no	no		Orf26	6.609e-05	no	no	no
SPRY4	5.553e-05	no	no	no		FLJ20699	5.734e-05	no	no	no		CD266	6.608e-05	no	no	no
FLJ13970	5.552e-05	no	no	no		MGC10200	5.734e-05	no	no	no		UNQ467	6.604e-05	no	no	no
KIAA0863	5.552e-05	no	no	no		MGC2668	5.732e-05	no	no	no		DORZ1	6.603e-05	no	no	no
RE2	5.551e-05	no	no	no		PP6-ARS-C	5.732e-05	no	no	no		ZACRP6	6.601e-05	no	no	no
FLJ13258	5.551e-05	no	no	no		FAM46A	5.732e-05	no	Yes	no		COX4-1	6.6e-05	no	no	no
FLJ39120	5.549e-05	no	no	no		RNF195	5.732e-05	no	no	no		PILT	6.6e-05	no	no	no
GOLGA6C	5.548e-05	no	no	no		SH3KBP1	5.731e-05	Yes	no	no		HST1192	6.6e-05	no	no	no
GNRH2	5.548e-05	no	no	no		FLJ30626	5.731e-05	no	no	no		SR-BP1	6.596e-05	no	no	no
ULA-1	5.548e-05	no	no	no		P4	5.729e-05	no	no	no		SKD1B	6.594e-05	no	no	no
HSCSC1	5.547e-05	no	no	no		PLA2G2C	5.728e-05	no	no	no		IFNGT1	6.594e-05	no	no	no
MGC44316	5.547e-05	no	no	no		DKFZP547B1713	5.728e-05	no	no	no		STO1	6.593e-05	no	no	no
TRAAK	5.547e-05	no	no	no		T-PLASTIN	5.726e-05	no	no	no		MGC163428	6.593e-05	no	no	no
SERBP1L	5.546e-05	no	no	no		DJ964F7	5.726e-05	no	no	no		STAT5B	6.59e-05	no	no	no
SF3B8	5.546e-05	no	no	no		KIAA0436	5.725e-05	no	no	no		CBY3	6.589e-05	no	no	no
NKX4-1	5.545e-05	no	no	no		G1L	5.724e-05	no	no	no		ZDHHC24	6.588e-05	no	no	no
GLUT11	5.545e-05	no	no	no		MGC62027	5.724e-05	no	no	no		AP-O	6.588e-05	no	no	no
VPAC1R	5.544e-05	no	no	no		ABHD17C	5.723e-05	no	no	no		FLJ46061	6.588e-05	no	no	no
IFI-6-16	5.542e-05	no	no	no		IRX4	5.723e-05	no	no	no		TESK1	6.586e-05	no	no	no
HST19690	5.541e-05	no	no	no		HCAP1	5.723e-05	no	no	no		KIAA0684	6.586e-05	no	no	no
PCSK8	5.54e-05	no	no	no		ZIP14	5.723e-05	no	no	no		L23A	6.584e-05	no	no	no
FLJ10666	5.54e-05	no	no	no		CRP1	5.722e-05	no	no	no		GPRK5	6.581e-05	no	no	no
KIAA0234	5.54e-05	no	no	no		ATP6E2	5.72e-05	no	no	no		CH	6.578e-05	no	no	no
CPX-III	5.538e-05	no	no	no		NCS-1	5.718e-05	no	no	no		GIG3	6.578e-05	no	no	no
MGC138534	5.536e-05	no	no	no		BA12D24	5.717e-05	no	no	no		CerCAM	6.578e-05	no	no	no
TMPK	5.536e-05	no	no	no		HST1601	5.716e-05	no	no	no		FLJ14917	6.576e-05	no	no	no
DKFZP761A132	5.535e-05	no	no	no		EAAT4	5.715e-05	no	no	no		MROH6	6.575e-05	no	no	no
KIAA0473	5.535e-05	no	no	no		CI-51K	5.715e-05	no	no	no		PIM	6.575e-05	no	no	no
RAB17	5.535e-05	no	no	no		NACT	5.714e-05	no	no	no		PFKL	6.575e-05	no	no	no
DFNB29	5.535e-05	no	no	no		DEP	5.712e-05	no	no	no		AEG-1	6.574e-05	no	no	no
KIAA0708	5.535e-05	no	no	no		BJS	5.712e-05	no	no	no		SFRS8	6.571e-05	no	no	no
SERZ1	5.535e-05	no	no	no		CRYG2	5.712e-05	no	no	no		RPF-1	6.57e-05	no	no	no
IP3R3	5.534e-05	no	no	no		KIAA0571	5.711e-05	no	no	no		C21ORF18	6.57e-05	no	no	no
XTP12	5.534e-05	no	no	no		MACAM1	5.711e-05	no	no	no		FLJ13187	6.568e-05	no	no	no
FLJ10647	5.533e-05	no	no	no		ATG16B	5.711e-05	no	no	no		DFNB8	6.566e-05	no	no	no
FLJ37391	5.532e-05	no	no	no		IFNGT1	5.71e-05	no	no	no		ENOVIN	6.566e-05	no	no	no
VRL3	5.531e-05	no	no	no		SMG-10	5.71e-05	no	no	no		ATFA	6.565e-05	no	no	no
WBSCR27	5.531e-05	no	no	no		KIAA1197	5.71e-05	no	no	no		RRT2	6.565e-05	no	no	no
FLJ31633	5.531e-05	no	no	no		KIAA0551	5.71e-05	no	no	no		MIR1	6.564e-05	no	no	no
DMT	5.531e-05	no	no	no		SAMP14	5.709e-05	no	no	no		SURF1	6.564e-05	no	no	no
NSE4B	5.53e-05	no	no	no		HOC3F	5.708e-05	no	no	no		SWIP1	6.564e-05	no	no	no
BIA1	5.529e-05	no	no	no		TPA1	5.706e-05	no	no	no		APRT	6.563e-05	no	no	no
GNT-IVB	5.529e-05	no	no	no		ZNF226	5.706e-05	no	Yes	no		OAT2	6.561e-05	no	no	no
MCG18	5.527e-05	no	no	no		GEM	5.705e-05	no	no	no		PPP1R128	6.561e-05	no	no	no
PARP13	5.527e-05	no	no	no		FLJ23841	5.704e-05	no	no	no		CD261	6.561e-05	no	no	no
IDH2	5.527e-05	no	no	no		FLJ00065	5.704e-05	no	no	no		SNRNP-B	6.561e-05	no	no	no
FLJ25477	5.525e-05	no	no	no		OCM1	5.704e-05	no	no	no		UNC45	6.56e-05	no	no	no
TAFII20	5.525e-05	no	no	no		MGC2454	5.703e-05	no	no	no		ATP6B	6.559e-05	no	no	no
Ang2	5.524e-05	no	no	no		TYRO5	5.702e-05	no	no	no		HO-1	6.556e-05	no	no	no
IGSF12	5.524e-05	no	no	no		TRAP3	5.701e-05	no	no	no		NSD3	6.556e-05	no	no	no
HST19662	5.524e-05	no	no	no		ZNT3	5.701e-05	no	no	no		LGMN1	6.555e-05	no	no	no
COL15A1	5.523e-05	no	no	no		FLJ13092	5.699e-05	no	no	no		ZFYVE17	6.554e-05	no	no	no
SWIP1	5.522e-05	no	no	no		GXVPLA2	5.698e-05	no	no	no		TECH	6.553e-05	no	no	no
PFS2	5.521e-05	no	no	no		CBY	5.698e-05	no	no	no		SPTAN1	6.553e-05	no	no	no
PME	5.521e-05	no	no	no		NF-66	5.697e-05	no	no	no		GALNAC-T6	6.549e-05	no	no	no
FLJ22761	5.521e-05	no	no	no		CACNLB1	5.697e-05	no	no	no		CWH43-N	6.549e-05	no	no	no
FLJ13289	5.521e-05	no	no	no		RPAC1	5.697e-05	no	no	no		MGC126064	6.549e-05	no	no	no
SNORA74A	5.521e-05	no	Yes	no		CH25H	5.696e-05	no	no	no		UNQ338	6.548e-05	no	no	no
EBRP	5.52e-05	no	no	no		FLJ37562	5.696e-05	no	no	no		BIA1	6.548e-05	no	no	no
PAKGAMMA	5.52e-05	no	no	no		MGC88819	5.695e-05	no	no	no		SYD	6.548e-05	no	no	no
THY28	5.519e-05	no	no	no		DNAJC23	5.694e-05	no	no	no		FLJ25870	6.545e-05	no	no	no
HSA-MIR-1248	5.519e-05	no	no	no		HTAK1	5.691e-05	no	no	no		CD72B	6.544e-05	no	no	no
HOXB13	5.519e-05	no	no	no		CP107	5.689e-05	no	no	no		MYHC-IIB	6.544e-05	no	no	no
RALDH3	5.518e-05	no	no	no		PTGES3L	5.686e-05	no	no	no		PRKAR1B	6.544e-05	no	no	no
FLJ36748	5.517e-05	no	no	no		VPS38	5.685e-05	no	no	no		BCMO	6.544e-05	no	no	no
KIAA0596	5.517e-05	no	no	no		PDE4DIP	5.684e-05	no	Yes	Yes		DKFZP434I1117	6.543e-05	no	no	no
HSET	5.516e-05	no	no	no		IFITM10	5.684e-05	no	no	no		FLJ20417	6.543e-05	no	no	no
FAAP	5.516e-05	no	no	no		C14ORF59	5.683e-05	no	no	no		MGC9850	6.543e-05	no	no	no
LPEAT1	5.515e-05	no	no	no		FLJ35803	5.683e-05	no	no	no		PRSS10	6.54e-05	no	no	no
CATSPER	5.515e-05	no	no	no		MGC33329	5.683e-05	no	no	no		PYGB	6.54e-05	no	no	no
KID3	5.514e-05	no	no	no		ABHD12A	5.681e-05	no	no	no		CFL	6.539e-05	no	no	no
HOX3E	5.513e-05	no	no	no		RDGB-BETA	5.68e-05	no	no	no		MGC17303	6.538e-05	no	no	no
KIAA0038	5.512e-05	no	no	no		FLJ33930	5.68e-05	no	no	no		MCG18	6.536e-05	no	no	no
FLJ16786	5.51e-05	no	no	no		KIAA0071	5.679e-05	no	no	no		MSK	6.533e-05	no	no	no
TP40	5.51e-05	no	no	no		FLJ22625	5.678e-05	no	no	no		RNF156	6.533e-05	no	no	no
IL-29	5.509e-05	no	no	no		CRYG3	5.678e-05	no	no	no		LYP2	6.531e-05	no	no	no
HFH4	5.507e-05	no	no	no		MGC116789	5.677e-05	no	no	no		A-SCID	6.531e-05	no	no	no
ELG1	5.507e-05	no	no	no		KIAA1119	5.676e-05	no	no	no		OR4F12	6.531e-05	no	no	no
CHC22	5.506e-05	no	no	no		2610509L04RIK	5.674e-05	no	no	no		PPP1R28	6.53e-05	no	no	no
HPCN1	5.506e-05	no	no	no		FLJ38426	5.674e-05	no	no	no		FLJ90779	6.529e-05	no	no	no
MGC15396	5.506e-05	no	no	no		MGC34830	5.674e-05	no	no	no		BRAP-1	6.529e-05	no	no	no
C21ORF18	5.505e-05	no	no	no		GFI1B	5.674e-05	no	no	no		REMP	6.528e-05	no	no	no
A170	5.504e-05	no	no	no		ZFYVE5	5.673e-05	no	no	no		KIP	6.528e-05	no	no	no
DKFZP566C134	5.504e-05	no	no	no		PAKGAMMA	5.673e-05	no	no	no		DKFZP586G1123	6.526e-05	no	no	no
CD122	5.504e-05	no	no	no		CACNA1C	5.672e-05	Yes	Yes	Yes		MLTN	6.525e-05	no	no	no
HST1707	5.503e-05	no	no	no		NCS2	5.671e-05	no	no	no		PPP1R67	6.525e-05	no	no	no
KAP4	5.503e-05	no	no	no		HIP-55	5.669e-05	no	no	no		CGI-128	6.525e-05	no	no	no
NUDT20	5.503e-05	no	no	no		FBL16	5.667e-05	no	no	no		FLJ11004	6.524e-05	no	no	no
GTX	5.501e-05	no	no	no		CISH3	5.665e-05	no	no	no		CLNMT	6.524e-05	no	no	no
RNF111L2	5.5e-05	no	no	no		DKFZP570I0164	5.665e-05	no	no	no		CDW199	6.524e-05	no	no	no
LYC4	5.5e-05	no	no	no		ARVCF	5.665e-05	no	no	no		KIAA1981	6.524e-05	no	no	no
MID49	5.5e-05	no	no	no		MGC99595	5.664e-05	no	no	no		MGC45386	6.523e-05	no	no	no
SMVT	5.5e-05	no	no	no		CYT19	5.663e-05	no	no	no		PEPD	6.519e-05	no	no	no
MGC22554	5.499e-05	no	no	no		P85B	5.663e-05	no	no	no		ZNF206	6.519e-05	no	no	no
FHOD3	5.498e-05	Yes	Yes	Yes		NDUFV3-AS1	5.663e-05	no	no	no		FACE2	6.519e-05	no	no	no
CFAP50	5.497e-05	no	no	no		CR6	5.663e-05	no	no	no		DJ1141E15	6.519e-05	no	no	no
PIF96	5.496e-05	no	no	no		HC90	5.663e-05	no	no	no		MAPKKK3	6.518e-05	no	no	no
TCTEX1D3	5.494e-05	no	no	no		HOX3A	5.659e-05	no	no	no		GSBS	6.518e-05	no	no	no
HAGH1	5.494e-05	no	no	no		RASIP2	5.659e-05	no	no	no		OR1I1Q	6.516e-05	no	no	no
MAGP-1	5.494e-05	no	no	no		CRSP100	5.658e-05	no	no	no		FLJ11895	6.515e-05	no	no	no
FLJ25968	5.494e-05	no	no	no		LFG2	5.658e-05	no	no	no		HIST3H2BB	6.515e-05	no	no	no
IZP6	5.494e-05	no	no	no		NET29	5.658e-05	no	no	no		FLJ36951	6.514e-05	no	no	no
PRSS50	5.493e-05	no	Yes	Yes		TDRD14B	5.657e-05	no	no	no		FAG	6.514e-05	no	no	no
QSK	5.493e-05	no	no	no		HSET	5.656e-05	no	no	no		AFI1B	6.514e-05	no	no	no
MGC10442	5.492e-05	no	no	no		BNF1	5.654e-05	no	no	no		ERK4	6.514e-05	no	no	no
T1R1	5.492e-05	no	no	no		FLJ25157	5.654e-05	no	no	no		ZIR1	6.514e-05	no	no	no
SDR12C1	5.491e-05	no	no	no		RE2	5.651e-05	no	no	no		CHKB-CPT1B	6.511e-05	no	no	no
P3H3	5.491e-05	no	no	no		FLJ20417	5.651e-05	no	no	no		CSNB2B	6.509e-05	no	no	no
KIAA0252	5.49e-05	no	no	no		NY-REN-28	5.65e-05	no	no	no		CHET9	6.506e-05	no	no	no
MTQ1	5.49e-05	no	no	no		GAT2	5.649e-05	no	no	no		HLA-D0-ALPHA	6.504e-05	no	no	no
C10ORF99	5.49e-05	no	no	no		SLD3	5.648e-05	no	no	no		FLJ10634	6.504e-05	no	no	no
Orf26	5.489e-05	no	no	no		MGC861	5.647e-05	no	no	no		GIDE	6.504e-05	no	no	no
KIAA1031	5.488e-05	no	no	no		SDR21C2	5.645e-05	no	no	no		ISC1	6.504e-05	no	no	no
HCCR-2	5.488e-05	no	no	no		MGC31967	5.644e-05	no	no	no		FM08	6.504e-05	no	no	no
ARF1	5.487e-05	no	no	no		L37A	5.644e-05	no	no	no		C1ORF194	6.503e-05	no	no	no
WDR93	5.485e-05	no	no	no		OKL38	5.642e-05	no	no	no		DKFZP667O2416	6.501e-05	no	no	no
MGC23908	5.485e-05	no	no	no		FLJ25383	5.642e-05	no	no	no		PFKP	6.5e-05	no	Yes	no
RAB3IL1	5.485e-05	no	no	no		SID6-1512	5.642e-05	no	no	no		LPAAT-ALPHA	6.5e-05	no	no	no
ABHD12A	5.485e-05	no	no	no		SNCB	5.642e-05	no	no	no		FLJ13258	6.499e-05	no	no	no
Cad	5.484e-05	no	no	no		SGN8	5.642e-05	no	no	no		IP	6.498e-05	no	no	no
RNF156	5.484e-05	no	no	no		STARD7	5.642e-05	no	no	no		FLJ40338	6.498e-05	no	no	no
NS5ATP1	5.484e-05	no	no	no		LINC00961	5.642e-05	no	no	no		CYP46	6.496e-05	no	no	no
IDDM22	5.483e-05	no	no	no		MGC102891	5.641e-05	no	no	no		FLJ10567	6.495e-05	no	no	no
FLJ32942	5.482e-05	no	no	no		PAS1C1	5.64e-05	no	no	no		NPHP9	6.495e-05	no	no	no
NET3	5.482e-05	no	no	no		CCDC176	5.639e-05	no	no	no		EAN57	6.495e-05	no	no	no
BA387M24	5.481e-05	no	no	no		CENH3	5.639e-05	no	no	no		SASS4	6.494e-05	no	no	no
NIPSNAP1	5.48e-05	no	no	no		MGC4639	5.639e-05	no	no	no		JCG6	6.494e-05	no	no	no
NF-E2	5.479e-05	no	no	no		PGR3	5.639e-05	no	no	no		KIAA0338	6.491e-05	no	no	no
MGC29949	5.479e-05	no	no	no		ZNF520	5.639e-05	no	no	no		GOLGA7A	6.49e-05	no	no	no
DKFZP566B183	5.478e-05	no	no	no		IMPDH2	5.637e-05	no	no	no		CAP3	6.489e-05	no	no	no
C-FOS	5.478e-05	no	no	no		L23A	5.636e-05	no	no	no		HCNTF	6.488e-05	no	no	no
NTN1L	5.476e-05	no	no	no		SDR9C6	5.636e-05	no	no	no		DSRC	6.486e-05	no	no	no
LASS6	5.476e-05	no	no	no		UBXN9	5.635e-05	no	no	no		SRRP37	6.486e-05	no	no	no
MGC10974	5.475e-05	no	no	no		APACD	5.635e-05	no	no	no		MABC1	6.485e-05	no	no	no
HTGN29	5.474e-05	no	no	no		HSEPI	5.634e-05	no	no	no		CDH28	6.485e-05	no	no	no
STIP	5.474e-05	no	no	no		MGC133384	5.634e-05	no	no	no		BHLHB12	6.484e-05	no	no	no
IKBR	5.472e-05	no	no	no		PDK4	5.632e-05	no	no	no		BCL7B	6.481e-05	no	no	no
H2AX	5.469e-05	no	no	no		PSMB6I	5.631e-05	no	no	no		MIST	6.481e-05	no	no	no
DEFB135	5.469e-05	no	no	no		ACTN3	5.631e-05	no	no	no		C14orf142	6.48e-05	no	no	no
HCAP1	5.468e-05	no	no	no		FREAC2	5.631e-05	no	no	no		HBQ	6.476e-05	no	no	no
MACAM1	5.468e-05	no	no	no		DJ40E16	5.63e-05	no	no	no		FLJ10815	6.476e-05	no	no	no
HCAT2	5.467e-05	no	no	no		NDPKA	5.629e-05	no	no	no		P2Y6	6.475e-05	no	no	no
HDAC7B	5.466e-05	no	no	no		ABLIM1	5.629e-05	no	Yes	no		CD292	6.475e-05	no	no	no
ADXR	5.466e-05	no	no	no		SLC26A8	5.628e-05	no	no	no		DNCLI2	6.474e-05	no	no	no
PDK4	5.465e-05	no	no	no		C14ORF95	5.628e-05	no	no	no		IRF5	6.474e-05	no	no	no
PPP1R128	5.465e-05	no	no	no		VDAC2	5.627e-05	no	no	no		PATE-M	6.474e-05	no	no	no
ANAPC12	5.463e-05	no	no	no		AGIF	5.627e-05	no	no	no		MGC119079	6.474e-05	no	no	no
KIAA0583	5.459e-05	no	no	no		PGAM-M	5.627e-05	no	no	no		WARTS	6.474e-05	no	no	no
DGT3	5.459e-05	no	no	no		VEGFR1	5.625e-05	no	no	no		HOX3E	6.473e-05	no	no	no
PDE4DIP	5.458e-05	no	Yes	Yes		PUNCTIN-2	5.622e-05	no	no	no		CHRNA10	6.471e-05	no	no	no
RPL11	5.458e-05	no	no	no		HSPC176	5.622e-05	no	no	no		C22ORF41	6.47e-05	no	no	no
ZMIZ7	5.457e-05	no	no	no		BA59I9	5.62e-05	no	no	no		FLJ20424	6.47e-05	no	no	no
TMBIM5	5.456e-05	no	no	no		KIAA1602	5.62e-05	no	no	no		NYD-SP15	6.469e-05	no	no	no
KIAA1828	5.456e-05	no	no	no		HCAT2	5.62e-05	no	no	no		FLJ21801	6.466e-05	no	no	no
CT129	5.456e-05	no	no	no		MAPKKK3	5.62e-05	no	no	no		LPA2	6.466e-05	no	no	no
MAPK2	5.453e-05	no	no	no		TAFII20	5.62e-05	no	no	no		HLUC7A	6.465e-05	no	no	no
RNASE13	5.453e-05	no	no	no		LPA2	5.619e-05	no	no	no		MGC26259	6.465e-05	no	no	no
P24A	5.452e-05	no	no	no		NF-E2	5.618e-05	no	no	no		EPN2-IT1	6.465e-05	no	no	no
SUA5	5.451e-05	no	no	no		CKMT1	5.617e-05	no	no	no		PRP21	6.465e-05	no	no	no
SLC9A1BP	5.45e-05	no	no	no		DKFZP434E2216	5.617e-05	no	no	no		CI-13KA	6.464e-05	no	no	no
CRABPI	5.447e-05	no	no	no		MGC4856	5.616e-05	no	no	no		SEC6P	6.463e-05	no	no	no
SGK071	5.446e-05	no	no	no		ANGPTL2	5.616e-05	no	no	no		MITF	6.463e-05	no	Yes	no
TBC1D6	5.445e-05	no	no	no		CTSX	5.616e-05	no	no	no		KAP2	6.461e-05	no	no	no
BM32A	5.444e-05	no	no	no		CRACD1	5.615e-05	no	no	no		MGC26733	6.461e-05	no	no	no
SMC	5.443e-05	no	no	no		AXOR12	5.614e-05	no	no	no		GK001	6.46e-05	no	no	no
HP1HS-GAMMA	5.442e-05	no	no	no		KNO1	5.614e-05	no	no	no		KIAA0806	6.459e-05	no	no	no
HN1A	5.442e-05	no	no	no		LRPC21	5.613e-05	no	no	no		ACSB	6.459e-05	no	no	no
RP13-531C17	5.441e-05	no	no	no		KIAA1561	5.613e-05	no	no	no		SM-CALP	6.458e-05	no	no	no
FLJ25008	5.441e-05	no	no	no		MGC126882	5.612e-05	no	no	no		WDR93	6.456e-05	no	no	no
TMEM238	5.441e-05	no	no	no		GADD34	5.612e-05	no	no	no		FLJ20699	6.456e-05	no	no	no
TEM7	5.441e-05	no	no	no		EM:AB023051	5.612e-05	no	no	no		FLJ25005	6.456e-05	no	no	no
LIV-1	5.44e-05	no	no	no		TMEM228	5.61e-05	no	no	no		C1RL1	6.455e-05	no	no	no
DKFZP586E0820	5.44e-05	no	no	no		BETA4GAL-T2	5.61e-05	no	no	no		HIP9	6.455e-05	no	no	no
FLJ20671	5.439e-05	no	no	no		KCNF2	5.609e-05	no	no	no		MGC126569	6.454e-05	no	no	no
P2Y6	5.439e-05	no	no	no		FLJ11618	5.609e-05	no	no	no		TRP14	6.454e-05	no	no	no
FLJ25287	5.438e-05	no	no	no		ACTR1A	5.608e-05	no	no	no		FAM90A26P	6.454e-05	no	no	no
IL-22BP	5.438e-05	no	no	no		PRDM12	5.608e-05	no	no	no		GPRV53	6.453e-05	no	no	no
CCRK	5.437e-05	no	no	no		IFI-6-16	5.607e-05	no	no	no		RFC40	6.451e-05	no	no	no
FLJ46061	5.436e-05	no	no	no		CTRB	5.605e-05	no	no	no		ANKS5A	6.451e-05	no	no	no
SCA36	5.434e-05	no	no	no		ZFP46	5.605e-05	no	no	no		NY-REN-37	6.451e-05	no	no	no
HSHISA	5.431e-05	no	no	no		MLN	5.604e-05	no	no	no		BARX1	6.451e-05	no	no	no
HST2697	5.43e-05	no	no	no		P12A	5.604e-05	no	no	no		URGCP-MRPS24	6.45e-05	no	no	no
RP5-1100H13	5.43e-05	no	no	no		TIGAR	5.602e-05	no	no	no		NGB	6.449e-05	no	no	no
DSC92	5.429e-05	no	no	no		GLUK3	5.602e-05	no	no	no		BA59I9	6.449e-05	no	no	no
LPP	5.429e-05	no	Yes	Yes		lnc-MFSD14B-18	5.6e-05	no	Yes	no		PDP3	6.446e-05	no	no	no
ARF4L	5.428e-05	no	no	no		C10orf4	5.6e-05	no	no	no		NEX1	6.446e-05	no	no	no
LOXC	5.427e-05	no	no	no		CORS1	5.599e-05	no	no	no		CTSW	6.446e-05	no	no	no
NKX4-2	5.425e-05	no	no	no		NSE4B	5.599e-05	no	no	no		FLJ40191	6.446e-05	no	no	no
CNB1	5.425e-05	no	no	no		BA374P20	5.599e-05	no	no	no		NLF3	6.445e-05	no	no	no
CXCDC2	5.425e-05	no	no	no		VPS2A	5.598e-05	no	no	no		DUSP13B	6.444e-05	no	no	no
ETS2	5.424e-05	no	no	no		PI31	5.598e-05	no	no	no		GPR58	6.444e-05	no	no	no
FICOLIN-2	5.424e-05	no	no	no		MGC45562	5.597e-05	no	no	no		GLTSCR1L	6.444e-05	no	no	no
FAM90A26P	5.423e-05	no	no	no		DJ39G22	5.595e-05	no	no	no		VPAC1R	6.443e-05	no	no	no
DKFZP667O2416	5.421e-05	no	no	no		CD193	5.595e-05	no	no	no		TAKL-4	6.441e-05	no	no	no
SPATA38	5.421e-05	no	no	no		FLJ30934	5.595e-05	no	no	no		MAMDC3	6.441e-05	no	no	no
BTBD29	5.421e-05	no	no	no		PP9099	5.593e-05	no	no	no		MNAR	6.44e-05	no	no	no
ATG8E	5.421e-05	no	no	no		MEIS2	5.592e-05	no	Yes	no		KAT12	6.44e-05	no	no	no
PI3K-C2BETA	5.421e-05	no	no	no		HRAS1	5.592e-05	no	no	no		OPHN1L1	6.439e-05	no	no	no
LPI-PC1	5.418e-05	no	no	no		FLJ12541	5.592e-05	no	no	no		HST19690	6.438e-05	no	no	no
SRCASM	5.418e-05	no	no	no		GPATC8	5.591e-05	no	no	no		MGC10715	6.438e-05	no	no	no
SPTB	5.418e-05	no	no	no		FLJ16786	5.591e-05	no	no	no		CX50	6.436e-05	no	no	no
ALS	5.417e-05	no	no	no		TIEG1	5.59e-05	no	no	no		V7	6.436e-05	no	no	no
RNF79	5.417e-05	no	no	no		FLJ90566	5.589e-05	no	no	no		MSRL1	6.436e-05	no	no	no
PGPI	5.417e-05	no	no	no		STEPP	5.589e-05	no	no	no		ARC105	6.435e-05	no	no	no
CK10	5.416e-05	no	no	no		C1ORF106	5.587e-05	no	no	no		DJ139D8	6.435e-05	no	no	no
TEX30	5.416e-05	no	no	no		EXO70P	5.585e-05	no	no	no		C5ORF65	6.434e-05	no	no	no
SRP40	5.415e-05	no	no	no		LARG	5.585e-05	no	no	no		MGC102753	6.433e-05	no	no	no
EFERIN	5.414e-05	no	no	no		FLJ32767	5.583e-05	no	no	no		MGC2734	6.433e-05	no	no	no
HMGIY	5.412e-05	no	no	no		KIAA1014	5.583e-05	no	no	no		SPG31	6.431e-05	no	no	no
L28	5.411e-05	no	no	no		NEBL	5.582e-05	no	Yes	no		FLJ37990	6.431e-05	no	no	no
ZNF918	5.41e-05	no	no	no		FLJ13287	5.582e-05	no	no	no		FLJ22257	6.43e-05	no	no	no
SLC26A8	5.41e-05	no	no	no		BUSTER1	5.582e-05	no	no	no		SPDYE	6.43e-05	no	no	no
HMPS	5.408e-05	no	no	no		BMRP	5.581e-05	no	no	no		KIAA1822	6.43e-05	no	no	no
FLJ25818	5.408e-05	no	no	no		MGC15873	5.58e-05	no	no	no		FLJ22757	6.429e-05	no	no	no
ANKRD4	5.408e-05	no	no	no		DKFZP727G131	5.58e-05	no	no	no		MGC14844	6.428e-05	no	no	no
CSTF-77	5.406e-05	no	no	no		DJ328E19	5.58e-05	no	no	no		HOC3F	6.426e-05	no	no	no
PPM2C2	5.405e-05	no	no	no		MGC32686	5.577e-05	no	no	no		GPR62	6.425e-05	no	no	no
MGC50372	5.405e-05	no	no	no		BA554C12	5.577e-05	no	no	no		APO-3	6.424e-05	no	no	no
FLJ41567	5.404e-05	no	no	no		RNF105	5.577e-05	no	no	no		ACHM4	6.423e-05	no	no	no
BPGAP1	5.403e-05	no	no	no		PELI2	5.577e-05	no	no	no		FGF6	6.421e-05	no	no	no
SUA1	5.402e-05	no	no	no		PR61G	5.577e-05	no	no	no		CYCE2	6.421e-05	no	no	no
ACTR1A	5.401e-05	no	no	no		SPG31	5.577e-05	no	no	no		NTAL	6.42e-05	no	no	no
C6ORF120	5.4e-05	no	no	no		FUS	5.577e-05	no	Yes	no		SVCT1	6.42e-05	no	no	no
ALPK2	5.399e-05	no	Yes	Yes		BBS19	5.577e-05	no	no	no		ADCA	6.42e-05	no	no	no
FGF6	5.399e-05	no	no	no		CD362	5.576e-05	no	no	no		KCNQ5	6.419e-05	no	Yes	no
CD102	5.398e-05	no	no	no		CT71	5.576e-05	no	no	no		PT1	6.418e-05	no	no	no
DMGDH	5.398e-05	no	no	no		ZNF766	5.576e-05	no	no	no		FLJ20313	6.416e-05	no	no	no
1-8U	5.398e-05	no	no	no		D22S674	5.576e-05	no	no	no		ZFP385	6.415e-05	no	no	no
CT59	5.396e-05	no	no	no		TCEB2	5.575e-05	no	no	no		FLJ11618	6.414e-05	no	no	no
DKFZP727G131	5.395e-05	no	no	no		KAP18	5.575e-05	no	no	no		TMEM228	6.414e-05	no	no	no
TBC1D3I	5.395e-05	no	no	no		U1SNRNPBP	5.574e-05	no	no	no		GDPGP1	6.413e-05	no	no	no
ST20-MTHFS	5.395e-05	no	no	no		HMAFF	5.574e-05	no	no	no		CD159A	6.411e-05	no	no	no
RPB3	5.394e-05	no	no	no		DRASIC	5.573e-05	no	no	no		FLJ23590	6.41e-05	no	no	no
VAV2	5.394e-05	no	no	no		ACY2	5.573e-05	no	no	no		CT111	6.41e-05	no	no	no
MGC44505	5.394e-05	no	no	no		KAP9	5.571e-05	no	no	no		SLIM	6.408e-05	no	no	no
SIT1	5.393e-05	no	no	no		BLOS2	5.571e-05	no	no	no		MGC29816	6.406e-05	no	no	no
ERG-3	5.393e-05	no	no	no		IDDM10	5.57e-05	no	no	no		DDDD	6.406e-05	no	no	no
DKFZP686E01200	5.392e-05	no	no	no		CSAA	5.57e-05	no	no	no		RSPH12	6.405e-05	no	no	no
CT155	5.392e-05	no	no	no		BDB1	5.567e-05	no	no	no		CMRP	6.404e-05	no	no	no
PXMP2	5.39e-05	no	no	no		dNT-1	5.567e-05	no	no	no		SFTPG	6.404e-05	no	no	no
PPP1R150	5.389e-05	no	no	no		NEUROTACTIN	5.566e-05	no	no	no		JBTS12	6.404e-05	no	no	no
PRMT4	5.389e-05	no	no	no		RC1	5.566e-05	no	no	no		KAP16	6.404e-05	no	no	no
CHRNA5	5.388e-05	no	no	no		ACTRIB	5.565e-05	no	no	no		CLM2	6.403e-05	no	no	no
SPG65	5.388e-05	no	no	no		KIF13A	5.565e-05	no	Yes	no		MY036	6.401e-05	no	no	no
ZGRF6	5.387e-05	no	no	no		HATPL	5.565e-05	no	no	no		BA444G7	6.401e-05	no	no	no
AREC3	5.386e-05	no	no	no		SPL	5.565e-05	no	no	no		GLUN2A	6.4e-05	no	no	no
FLJ37794	5.386e-05	no	no	no		TLDC1	5.563e-05	no	no	no		DA59H18	6.4e-05	no	no	no
P44ERK1	5.385e-05	no	no	no		CHKB-CPT1B	5.562e-05	no	no	no		KIAA1824	6.399e-05	no	no	no
MGC14844	5.385e-05	no	no	no		C11ORF85	5.56e-05	no	no	no		PANDER	6.399e-05	no	no	no
CYP46	5.385e-05	no	no	no		HST17706	5.559e-05	no	no	no		PLA2G2F	6.399e-05	no	no	no
KIAA1039	5.384e-05	no	no	no		RNF109	5.559e-05	no	no	no		ATP1AL1	6.399e-05	no	no	no
EDEN-BP	5.383e-05	no	no	no		VAP-A	5.559e-05	no	no	no		KIAA1287	6.399e-05	no	no	no
C14ORF73	5.382e-05	no	no	no		KIAA1658	5.558e-05	no	no	no		C16ORF90	6.399e-05	no	no	no
EDDM9	5.382e-05	no	no	no		DKFZP666G247	5.558e-05	no	no	no		MGC75360	6.398e-05	no	no	no
CYTOHESIN-3	5.381e-05	no	no	no		M40	5.555e-05	no	no	no		MGC62027	6.398e-05	no	no	no
ADAMTSL6	5.381e-05	no	no	no		GOLGA6C	5.555e-05	no	no	no		FLJ35841	6.396e-05	no	no	no
TMEM120B	5.38e-05	no	no	no		MGC34554	5.554e-05	no	no	no		JV5-1	6.393e-05	no	no	no
LOC150383	5.377e-05	no	no	no		VPAC1R	5.553e-05	no	no	no		EVR4	6.391e-05	no	no	no
MGC3121	5.374e-05	no	no	no		PEX14	5.553e-05	no	no	no		MGC2616	6.391e-05	no	no	no
KIAA0102	5.373e-05	no	no	no		MPI	5.553e-05	no	no	no		2P1	6.391e-05	no	no	no
KIAA0354	5.372e-05	no	no	no		ADXR	5.553e-05	no	no	no		MKS9	6.39e-05	no	no	no
GALK	5.372e-05	no	no	no		MGC71973	5.552e-05	no	no	no		BHLHD3	6.39e-05	no	no	no
BJS	5.371e-05	no	no	no		Gem	5.552e-05	no	no	no		ZNF910	6.39e-05	no	no	no
HSPE-39	5.371e-05	no	no	no		MDN	5.551e-05	no	no	no		SPTB	6.39e-05	no	no	no
DKFZP761M2312	5.371e-05	no	no	no		FLJ12876	5.551e-05	no	no	no		CCDC166	6.389e-05	no	no	no
VEMSGP	5.37e-05	no	no	no		FLJ43374	5.551e-05	no	no	no		MGC99595	6.388e-05	no	no	no
RGS11	5.37e-05	no	no	no		RAP30	5.55e-05	no	no	no		HLA-DOB	6.388e-05	no	no	no
MOCOD	5.368e-05	no	no	no		FLJ44618	5.55e-05	no	no	no		FLJ12132	6.388e-05	no	no	no
DIPA	5.368e-05	no	no	no		TNNI3K	5.55e-05	no	Yes	no		AGER	6.388e-05	no	no	no
RP48	5.368e-05	no	no	no		OAT2	5.549e-05	no	no	no		LCCS3	6.386e-05	no	no	no
JV5-1	5.368e-05	no	no	no		SDR48A1	5.548e-05	no	no	no		MSE1	6.386e-05	no	no	no
ZACRP6	5.367e-05	no	no	no		FLJ25287	5.548e-05	no	no	no		MGC33367	6.384e-05	no	no	no
FLJ20010	5.367e-05	no	no	no		FLJ34306	5.547e-05	no	no	no		SAA2	6.381e-05	no	no	no
TST	5.36e-05	no	no	no		YANK1	5.546e-05	no	no	no		MGC15396	6.381e-05	no	no	no
GNAZ	5.359e-05	no	no	no		NBND3	5.546e-05	no	no	no		TAFI	6.381e-05	no	no	no
CT21	5.359e-05	no	no	no		NEDD3	5.545e-05	no	no	no		PR61B	6.381e-05	no	no	no
DJ836N17	5.359e-05	no	no	no		NTPDASE-8	5.545e-05	no	no	no		MGC39265	6.38e-05	no	no	no
TNNT2	5.359e-05	no	Yes	no		PRO1280	5.544e-05	no	no	no		PIS	6.38e-05	no	no	no
HMAFF	5.358e-05	no	no	no		C14ORF46	5.544e-05	no	no	no		HNRNP-R	6.379e-05	no	no	no
CAMK2G	5.357e-05	Yes	no	no		SURF1	5.544e-05	no	no	no		PRSS31	6.379e-05	no	no	no
CMH10	5.357e-05	no	no	no		MGC43690	5.543e-05	no	no	no		MGC14804	6.378e-05	no	no	no
SOGA2	5.356e-05	no	no	no		KIAA0680	5.543e-05	no	no	no		TM7SF1L1	6.378e-05	no	no	no
SLC25A30	5.355e-05	no	no	no		FLJ44299	5.542e-05	no	no	no		RESA1	6.378e-05	no	no	no
MGC13017	5.355e-05	no	no	no		ARID1B	5.541e-05	no	Yes	no		SLC25A30	6.376e-05	no	no	no
GPR8	5.355e-05	no	no	no		FLJ00086	5.539e-05	no	no	no		FER	6.375e-05	no	Yes	Yes
MSPL	5.353e-05	no	no	no		ELMO-1	5.539e-05	no	no	no		TDRD20A	6.375e-05	no	no	no
RBCC	5.352e-05	no	no	no		RNF156	5.538e-05	no	no	no		YJR010C-A	6.374e-05	no	no	no
UBC	5.35e-05	no	no	no		MAMDC3	5.537e-05	no	no	no		SORD	6.374e-05	no	no	no
FLJ13732	5.35e-05	no	no	no		BBC2	5.537e-05	no	no	no		UBXN2C	6.374e-05	no	no	no
WINS1	5.35e-05	no	no	no		PLA2G2F	5.537e-05	no	no	no		CTF18	6.373e-05	no	no	no
URGCP-MRPS24	5.35e-05	no	no	no		CFAP89	5.536e-05	no	no	no		CAPERALPHA	6.373e-05	no	no	no
GIL	5.349e-05	no	no	no		SELM	5.536e-05	no	no	no		CAMKIINALPHA	6.371e-05	no	no	no
LRRC14OS	5.348e-05	no	no	no		C10orf35	5.533e-05	no	no	no		CT152	6.37e-05	no	no	no
BETA5T	5.348e-05	no	no	no		APPL	5.532e-05	no	no	no		RAP55B	6.37e-05	no	no	no
DMDL	5.347e-05	no	no	no		FLJ37391	5.531e-05	no	no	no		MGC138504	6.366e-05	no	no	no
MABC1	5.345e-05	no	no	no		LOXC	5.53e-05	no	no	no		MGC44316	6.366e-05	no	no	no
KIAA1893	5.345e-05	no	no	no		UBALD1	5.53e-05	no	no	no		LIME	6.365e-05	no	no	no
DIP2C	5.345e-05	no	Yes	Yes		VPAC2R	5.529e-05	no	no	no		CRP1	6.365e-05	no	no	no
DJ431A14	5.344e-05	no	no	no		OTTHUMG00000019597	5.527e-05	no	no	no		HMIS18ALPHA	6.364e-05	no	no	no
C19ORF73	5.344e-05	no	no	no		FLJ12998	5.527e-05	no	no	no		MMSDH	6.364e-05	no	no	no
WDR86	5.343e-05	no	no	no		ARHGAP45	5.527e-05	no	no	no		RAD4	6.364e-05	no	no	no
IP3-3KA	5.343e-05	no	no	no		PAM	5.527e-05	no	Yes	no		DJ964F7	6.364e-05	no	no	no
SLC2C	5.343e-05	no	no	no		CLPX	5.527e-05	no	no	no		CPNE7	6.361e-05	no	no	no
FLJ12541	5.342e-05	no	no	no		ADPRHL1	5.526e-05	no	no	no		TANGO9	6.361e-05	no	no	no
BARX1	5.341e-05	no	no	no		CD72B	5.526e-05	no	no	no		HSD24	6.36e-05	no	no	no
FLJ31529	5.34e-05	no	no	no		KIAA1515	5.525e-05	no	no	no		MEDA-7	6.359e-05	no	no	no
CD351	5.337e-05	no	no	no		CAMKIINALPHA	5.525e-05	no	no	no		MGCA	6.358e-05	no	no	no
KIAA1673	5.335e-05	no	no	no		CBX6	5.524e-05	no	no	no		PCSK8	6.358e-05	no	no	no
CPA5	5.335e-05	no	no	no		POLGA	5.523e-05	no	no	no		KIAA1394	6.355e-05	no	no	no
SYNJ2BP-COX16	5.333e-05	no	no	no		IFNABR	5.523e-05	no	no	no		RARL	6.355e-05	no	no	no
LOC399888	5.332e-05	no	no	no		CD304	5.522e-05	no	no	no		BA379P1	6.355e-05	no	no	no
APXL3	5.332e-05	no	no	no		PET-1	5.522e-05	no	no	no		TCTEX1D3	6.355e-05	no	no	no
MEKK7	5.332e-05	no	no	no		FBX32	5.522e-05	no	no	no		CFAP89	6.355e-05	no	no	no
CT152	5.332e-05	no	no	no		ELP70	5.521e-05	no	no	no		C19ORF38	6.354e-05	no	no	no
FLJ46536	5.331e-05	no	no	no		KIAA0968	5.52e-05	no	no	no		DEXRAS1	6.354e-05	no	no	no
RNF105	5.331e-05	no	no	no		FLAME-3	5.52e-05	no	no	no		AC022389	6.354e-05	no	no	no
UTP7	5.331e-05	no	no	no		RNF50	5.52e-05	no	no	no		LOC57722	6.353e-05	no	no	no
ERC1	5.33e-05	no	Yes	no		MCT9	5.517e-05	no	no	no		KIAA1887	6.35e-05	no	no	no
DPPII	5.33e-05	no	no	no		HCS	5.516e-05	no	no	no		MLN	6.35e-05	no	no	no
FLJ11305	5.329e-05	no	no	no		TRAP240L	5.515e-05	no	no	no		NR1F1	6.349e-05	no	no	no
TYK1	5.329e-05	no	no	no		IL-1RACPIP	5.514e-05	no	no	no		FLJ39553	6.348e-05	no	no	no
ANKRD9	5.328e-05	no	no	no		SOGA2	5.513e-05	no	no	no		BHLHC12	6.346e-05	no	no	no
CGI-96	5.328e-05	no	no	no		S100BETA	5.513e-05	no	no	no		OCA3	6.346e-05	no	no	no
SCLIP	5.327e-05	no	no	no		TVP23C	5.513e-05	no	Yes	no		PRO3113	6.345e-05	no	no	no
NDPKC	5.326e-05	no	no	no		WDR86	5.513e-05	no	no	no		FLJ22761	6.345e-05	no	no	no
P20	5.326e-05	no	no	no		SLC38A10	5.513e-05	Yes	no	no		CLDN9	6.345e-05	no	no	no
VPS38	5.325e-05	no	no	no		KIAA0204	5.511e-05	no	no	no		KIAA1855	6.345e-05	no	no	no
PACE	5.323e-05	no	no	no		TBC1D3I	5.511e-05	no	no	no		MCDC1	6.344e-05	no	no	no
CT65	5.323e-05	no	no	no		GS2L	5.511e-05	no	no	no		NET24	6.344e-05	no	no	no
STARA	5.323e-05	no	no	no		JV5-1	5.51e-05	no	no	no		FLJ32372	6.344e-05	no	no	no
IFRC	5.323e-05	no	no	no		CUL4A	5.51e-05	no	no	no		MGC31967	6.343e-05	no	no	no
MLL1A	5.322e-05	no	no	no		MRPL35	5.51e-05	no	no	no		FLJ14611	6.343e-05	no	no	no
AMPH	5.321e-05	no	no	no		GPR38	5.51e-05	no	no	no		KRTAP18-10	6.339e-05	no	no	no
KIAA1389	5.321e-05	no	no	no		PPP1R101	5.509e-05	no	no	no		CCND3	6.339e-05	no	no	no
DKFZP586M1120	5.321e-05	no	no	no		C9ORF131	5.509e-05	no	no	no		FLJ44612	6.338e-05	no	no	no
DEFB-25	5.32e-05	no	no	no		AFF4	5.508e-05	no	Yes	no		TRNR2	6.334e-05	no	no	no
MINT3	5.32e-05	no	no	no		LRRC14OS	5.508e-05	no	no	no		VEMSGP	6.334e-05	no	no	no
C21ORF4	5.32e-05	no	no	no		DKFZP762C143	5.507e-05	no	no	no		SFMD	6.334e-05	no	no	no
GRB7	5.319e-05	no	no	no		SGK071	5.507e-05	no	no	no		LZTS1	6.334e-05	no	no	no
FOAP-10	5.319e-05	no	no	no		RPL8	5.506e-05	no	no	no		SGK071	6.333e-05	no	no	no
HO-1	5.318e-05	no	no	no		AIR1	5.504e-05	no	no	no		MEKK9	6.333e-05	no	no	no
TRNR2	5.318e-05	no	no	no		MAPK2	5.503e-05	no	no	no		ETFR-1	6.333e-05	no	no	no
SLC25A3	5.317e-05	no	Yes	no		ART5	5.502e-05	no	no	no		EPM	6.331e-05	no	no	no
FLJ22160	5.315e-05	no	no	no		C/EBP-BETA	5.502e-05	no	no	no		DENND7B	6.33e-05	no	no	no
EPM	5.315e-05	no	no	no		C16ORF90	5.501e-05	no	no	no		FLJ10666	6.328e-05	no	no	no
WAP8	5.314e-05	no	no	no		TIMP3	5.501e-05	no	no	no		RNF195	6.328e-05	no	no	no
INSSA3	5.314e-05	no	no	no		KIAA1855	5.501e-05	no	no	no		FLJ21439	6.326e-05	no	no	no
FLJ22087	5.312e-05	no	no	no		P2Y6	5.501e-05	no	no	no		GLOD3	6.326e-05	no	no	no
NCBP2-AS2	5.311e-05	no	no	no		MROH6	5.5e-05	no	no	no		BHLHE20	6.326e-05	no	no	no
HPE4	5.311e-05	no	no	no		LMF1	5.497e-05	no	Yes	no		WAP2	6.325e-05	no	no	no
FLJ10786	5.31e-05	no	no	no		KIAA0945	5.496e-05	no	no	no		PLCB3	6.324e-05	no	no	no
MGR	5.31e-05	no	no	no		HSR1	5.496e-05	no	no	no		KIAA1164	6.323e-05	no	no	no
ZNF801	5.31e-05	no	no	no		DJ139D8	5.496e-05	no	no	no		SELO	6.323e-05	no	no	no
PAP39	5.309e-05	no	no	no		GDE2	5.495e-05	no	no	no		IP3-3KA	6.323e-05	no	no	no
LRRC3C	5.309e-05	no	no	no		GAS	5.495e-05	no	no	no		UDPASE	6.319e-05	no	no	no
IP90	5.309e-05	no	no	no		SPRY4	5.494e-05	no	no	no		DCTN-22	6.319e-05	no	no	no
GC-UNC45	5.309e-05	no	no	no		KXDL	5.494e-05	no	no	no		HHARP	6.318e-05	no	no	no
HAPONIN	5.307e-05	no	no	no		H-B	5.493e-05	no	no	no		PTPH1	6.316e-05	no	no	no
PPP1R106	5.306e-05	no	no	no		Arp11	5.493e-05	no	no	no		CILD13	6.311e-05	no	no	no
DLX1	5.306e-05	no	no	no		LOC57722	5.492e-05	no	no	no		DIA1	6.31e-05	no	no	no
PANP	5.306e-05	no	no	no		C-FOS	5.492e-05	no	no	no		SLRR2E	6.309e-05	no	no	no
MGC102891	5.306e-05	no	no	no		CD210	5.492e-05	no	no	no		PRSS33	6.308e-05	no	no	no
EPITEMPIN	5.305e-05	no	no	no		MGC4631	5.492e-05	no	no	no		FLJ10700	6.308e-05	no	no	no
KIAA1001	5.304e-05	no	no	no		FLJ39565	5.491e-05	no	no	no		HLA-DP1B	6.305e-05	no	no	no
MGC26733	5.304e-05	no	no	no		ATPIB	5.491e-05	no	no	no		DJ616B8	6.305e-05	no	no	no
BOM	5.304e-05	no	no	no		CTF18	5.488e-05	no	no	no		ZASP	6.305e-05	no	no	no
ABH2	5.302e-05	no	no	no		ROBLD1	5.487e-05	no	no	no		KLS	6.304e-05	no	no	no
FLJ40511	5.301e-05	no	no	no		UBR3	5.487e-05	no	Yes	Yes		FAM68A	6.304e-05	no	no	no
MYLK5	5.3e-05	no	no	no		DRAK1	5.484e-05	no	no	no		HYAK3-2	6.303e-05	no	no	no
GPR25	5.3e-05	no	no	no		MANA	5.484e-05	no	no	no		MGC133384	6.301e-05	no	no	no
PHZ-49	5.3e-05	no	no	no		FLJ10998	5.483e-05	no	no	no		KIAA0649	6.301e-05	no	no	no
MRVLDC3	5.299e-05	no	no	no		FAM44B	5.482e-05	no	no	no		CFAP22	6.3e-05	no	no	no
IRX-3	5.299e-05	no	no	no		P110D	5.482e-05	no	no	no		RGSL2	6.3e-05	no	no	no
SOX1	5.298e-05	no	no	no		FAM1A	5.482e-05	no	no	no		TSG	6.299e-05	no	no	no
KIAA1599	5.298e-05	no	no	no		YPEL1	5.48e-05	no	no	no		EN-7	6.299e-05	no	no	no
KIFC2	5.297e-05	no	no	no		CTRP15	5.479e-05	no	no	no		GLTDC1	6.298e-05	no	no	no
CIA1	5.297e-05	no	no	no		SP-22	5.478e-05	no	no	no		LGTN	6.296e-05	no	no	no
MPIF2	5.297e-05	no	no	no		FLJ20313	5.478e-05	no	no	no		CYPL1	6.295e-05	no	no	no
MGC15873	5.297e-05	no	no	no		ET	5.478e-05	no	no	no		ATP2B4	6.295e-05	no	Yes	no
DFNB36	5.297e-05	no	no	no		ZNF751	5.478e-05	no	no	no		ODF5	6.294e-05	no	no	no
LOC374920	5.296e-05	no	no	no		HSA269537	5.478e-05	no	no	no		OGU1	6.294e-05	no	no	no
ROLT	5.296e-05	no	no	no		HST19690	5.476e-05	no	no	no		HGH-N	6.293e-05	no	no	no
MGC116789	5.296e-05	no	no	no		TESSP1	5.476e-05	no	no	no		DEFB135	6.291e-05	no	no	no
CWC26	5.295e-05	no	no	no		DKFZP779B1634	5.476e-05	no	no	no		HSC	6.291e-05	no	no	no
LPA2	5.295e-05	no	no	no		NM15	5.476e-05	no	no	no		PRPS3	6.291e-05	no	no	no
WEE2-AS1	5.294e-05	no	Yes	no		TGE	5.476e-05	no	no	no		PBMUCL1	6.291e-05	no	no	no
AD-004	5.293e-05	no	no	no		GERP	5.475e-05	no	no	no		MGC4549	6.29e-05	no	no	no
D0S117E	5.293e-05	no	no	no		RNF1	5.475e-05	no	no	no		RNF100	6.29e-05	no	no	no
FLJ11190	5.292e-05	no	no	no		KIAA0136	5.475e-05	no	no	no		WAP8	6.288e-05	no	no	no
FLJ35767	5.291e-05	no	no	no		SBBI31	5.475e-05	no	no	no		GOT1	6.286e-05	no	no	no
OR4F5	5.291e-05	no	no	no		BHLHA24	5.474e-05	no	no	no		IDH2	6.285e-05	no	no	no
BAF57	5.29e-05	no	no	no		CD107A	5.473e-05	no	no	no		LYGH	6.285e-05	no	no	no
FLJ12760	5.289e-05	no	no	no		PDCN	5.472e-05	no	no	no		Arp11	6.284e-05	no	no	no
MIO10	5.289e-05	no	no	no		LP1	5.472e-05	no	no	no		FLJ38628	6.284e-05	no	no	no
BBS19	5.288e-05	no	no	no		BTBD25	5.47e-05	no	no	no		SLC9A1BP	6.283e-05	no	no	no
C10orf35	5.287e-05	no	no	no		HPH3	5.468e-05	no	no	no		IKBR	6.283e-05	no	no	no
MGC33993	5.286e-05	no	no	no		SHCB	5.468e-05	no	no	no		SIRT7	6.281e-05	no	no	no
KIAA1754L	5.286e-05	no	no	no		H_RG271G13	5.466e-05	no	no	no		PRELID4B	6.281e-05	no	no	no
PRPS3	5.286e-05	no	no	no		PK3	5.465e-05	no	no	no		ETS2	6.281e-05	no	no	no
BPY1B	5.286e-05	no	no	no		GSE1	5.465e-05	no	Yes	Yes		KIAA0354	6.28e-05	no	no	no
HYAK3-2	5.285e-05	no	no	no		NEUR2	5.465e-05	no	no	no		TST2	6.28e-05	no	no	no
FLJ22938	5.285e-05	no	no	no		P50BP	5.465e-05	no	no	no		KIAA1064	6.279e-05	no	no	no
ROR2	5.285e-05	no	Yes	Yes		HCNTF	5.464e-05	no	no	no		CKS2	6.278e-05	no	no	no
DKFZP434C1714	5.285e-05	no	no	no		CT129	5.464e-05	no	no	no		PART15	6.278e-05	no	no	no
GLUN2A	5.284e-05	no	no	no		FALDH	5.464e-05	no	no	no		FLJ12998	6.278e-05	no	no	no
PSMB6I	5.284e-05	no	no	no		MDG	5.464e-05	no	no	no		Q0310	6.276e-05	no	no	no
FLJ33970	5.283e-05	no	no	no		PRSS10	5.463e-05	no	no	no		KIAA0933	6.276e-05	no	no	no
KIAA1665	5.283e-05	no	no	no		ITIH	5.463e-05	no	no	no		VIK	6.275e-05	no	no	no
HS6M1-28	5.283e-05	no	no	no		CDGIE	5.463e-05	no	no	no		C4ORF47	6.273e-05	no	no	no
IDE	5.282e-05	no	no	no		BA330O11	5.463e-05	no	no	no		MGC9434	6.273e-05	no	no	no
HMW	5.282e-05	no	no	no		HL11	5.463e-05	no	no	no		DKFZP761G122	6.271e-05	no	no	no
CLSPN	5.281e-05	no	no	no		DSRC	5.463e-05	no	no	no		FOXD6	6.271e-05	no	no	no
CRF1	5.281e-05	no	no	no		CFAP22	5.462e-05	no	no	no		RP11-175E9	6.271e-05	no	Yes	no
PROTOR-1	5.281e-05	no	no	no		FLJ40217	5.461e-05	no	no	no		FLJ00135	6.271e-05	no	no	no
HIGIRK2	5.28e-05	no	no	no		FLJ11305	5.461e-05	no	no	no		LCB	6.269e-05	no	no	no
RNF83	5.279e-05	no	no	no		CGI-30	5.461e-05	no	no	no		FAM227A	6.268e-05	no	no	no
DKFZP434F195	5.279e-05	no	no	no		MGC5469	5.46e-05	no	no	no		ZACRP4	6.268e-05	no	no	no
ZNF766	5.277e-05	no	no	no		BC022889	5.46e-05	no	no	no		BETA4GAL-T7	6.266e-05	no	no	no
CYP4F11	5.276e-05	no	no	no		BHLHE78	5.46e-05	no	no	no		KIAA0590	6.266e-05	no	no	no
PEP3	5.275e-05	no	no	no		SLX2A	5.459e-05	no	no	no		SPINO	6.266e-05	no	no	no
MGC39725	5.275e-05	no	no	no		MGCRACGAP	5.459e-05	no	no	no		PGR5	6.266e-05	no	no	no
LUMA	5.274e-05	no	no	no		ZNF377	5.457e-05	no	no	no		8D6A	6.266e-05	no	no	no
FLJ21709	5.273e-05	no	no	no		AAF132	5.456e-05	no	no	no		MSTP095	6.265e-05	no	no	no
FLJ44753	5.273e-05	no	no	no		SYNCOILIN	5.455e-05	no	no	no		ZNF40C	6.265e-05	no	no	no
P2X2	5.271e-05	no	no	no		SPAX5	5.454e-05	no	no	no		ANAMORSIN	6.265e-05	no	no	no
SNAMA	5.27e-05	no	no	no		CDC14B	5.453e-05	no	Yes	Yes		CLM9	6.264e-05	no	no	no
MGCA	5.269e-05	no	no	no		PHZ-67	5.453e-05	no	no	no		ZNF207	6.261e-05	no	no	no
LFG2	5.269e-05	no	no	no		HSA-MIR-6866	5.453e-05	no	no	no		AD-004	6.261e-05	no	no	no
HERF1	5.268e-05	no	no	no		MGC50452	5.451e-05	no	no	no		PPP1R96	6.261e-05	no	no	no
DJ90G24	5.268e-05	no	no	no		TUDOR3	5.451e-05	no	no	no		KIAA0102	6.261e-05	no	no	no
YHC1	5.266e-05	no	no	no		AFI1A	5.451e-05	no	no	no		FLJ43808	6.26e-05	no	no	no
NTPDASE-8	5.266e-05	no	no	no		KIAA1571	5.45e-05	no	no	no		FLJ10524	6.256e-05	no	no	no
CAP2	5.266e-05	no	Yes	no		RNF38	5.45e-05	no	no	no		GXVPLA2	6.256e-05	no	no	no
C1RL1	5.265e-05	no	no	no		FLJ11895	5.45e-05	no	no	no		FLJ21415	6.256e-05	no	no	no
RABAPTIN-5	5.264e-05	no	no	no		KMT2G	5.45e-05	no	no	no		MGC34554	6.254e-05	no	no	no
CRKL	5.263e-05	no	no	no		OR17-228	5.449e-05	no	no	no		GOLGA6B	6.254e-05	no	no	no
KV2	5.262e-05	no	no	no		DSCR1L2	5.447e-05	no	no	no		TPX	6.25e-05	no	no	no
RP65	5.262e-05	no	no	no		SI-1-2-19	5.447e-05	no	no	no		MGC10986	6.25e-05	no	no	no
FLJ25770	5.261e-05	no	no	no		CSNK2A1	5.447e-05	no	no	no		SML1	6.25e-05	no	no	no
PRO1472	5.261e-05	no	no	no		PSPN	5.446e-05	no	no	no		MGC2642	6.25e-05	no	no	no
MGC126569	5.26e-05	no	no	no		CLUH	5.446e-05	no	no	no		MADH8	6.25e-05	no	no	no
FRCL1	5.26e-05	no	no	no		PAPT	5.446e-05	no	no	no		DJ776F14	6.249e-05	no	no	no
HCS	5.259e-05	no	no	no		MGC21874	5.445e-05	no	no	no		WAPL	6.249e-05	no	no	no
MGC138391	5.258e-05	no	no	no		FLJ12443	5.443e-05	no	no	no		ACP5	6.248e-05	no	no	no
CPNE1	5.257e-05	no	no	no		CYP46	5.442e-05	no	no	no		LHX6	6.248e-05	no	no	no
DKFZP761C07121	5.257e-05	no	no	no		CCAR1	5.442e-05	no	Yes	no		RGS6	6.245e-05	no	no	no
MGC14289	5.256e-05	no	no	no		XP1	5.442e-05	no	no	no		DKFZP762C143	6.245e-05	no	no	no
LINK-GEFII	5.256e-05	no	no	no		IPO1	5.441e-05	no	no	no		PH2	6.243e-05	no	no	no
NARR	5.255e-05	no	no	no		P101	5.44e-05	no	no	no		VPS28	6.241e-05	no	no	no
MCT6	5.254e-05	no	no	no		NTR	5.439e-05	no	no	no		SH3BP3	6.241e-05	no	no	no
FLJ44618	5.252e-05	no	no	no		CHRNA3	5.438e-05	no	no	no		UTP7	6.24e-05	no	no	no
ILV1	5.25e-05	no	no	no		C2ORF72	5.438e-05	no	no	no		CT32	6.239e-05	no	no	no
CENTD2	5.249e-05	no	no	no		MGC35423	5.437e-05	no	no	no		SDR21C1	6.239e-05	no	no	no
MCM1	5.249e-05	no	no	no		WS9-14	5.436e-05	no	no	no		C11orf16	6.239e-05	no	no	no
KAP18	5.249e-05	no	no	no		MGC131831	5.436e-05	no	no	no		MIO10	6.239e-05	no	no	no
KIAA1909	5.249e-05	no	no	no		CH	5.436e-05	no	no	no		OST265	6.238e-05	no	no	no
MAP1L	5.249e-05	no	no	no		PBX2MHC	5.434e-05	no	no	no		KIAA1384	6.238e-05	no	no	no
IDH3A	5.247e-05	no	no	no		ETAA16	5.433e-05	no	no	no		KIAA0970	6.236e-05	no	no	no
CTNNA3	5.247e-05	no	Yes	Yes		DCBLD2	5.432e-05	no	Yes	Yes		PXMP2	6.236e-05	no	no	no
MGC19780	5.247e-05	no	no	no		TTC9A	5.432e-05	no	no	no		MGC10772	6.235e-05	no	no	no
ZNT3	5.247e-05	no	no	no		RP44	5.431e-05	no	no	no		ALPPL2	6.234e-05	no	no	no
FRA-1	5.246e-05	no	no	no		YWHAS	5.431e-05	no	no	no		MGC45562	6.234e-05	no	no	no
MGC45594	5.245e-05	no	no	no		RBCC	5.43e-05	no	no	no		MGC26885	6.233e-05	no	no	no
NDPKB	5.245e-05	no	no	no		ARFL3	5.43e-05	no	no	no		KIAA0079	6.233e-05	no	no	no
CSNK2A1	5.245e-05	no	no	no		LRTM2	5.43e-05	no	no	no		RASI-1	6.233e-05	no	no	no
GOLGA8R	5.245e-05	no	no	no		DJ90G24	5.429e-05	no	no	no		FLJ42707	6.231e-05	no	no	no
MGC10200	5.243e-05	no	no	no		NP55	5.429e-05	no	no	no		AGTIL	6.23e-05	no	no	no
CYTOR4	5.243e-05	no	no	no		SLC25A30	5.428e-05	no	no	no		PATZ2	6.229e-05	no	no	no
DNMT3B	5.243e-05	no	no	no		LAT-2	5.427e-05	no	no	no		FLJ40363	6.229e-05	no	no	no
Arp11	5.242e-05	no	no	no		CORD11	5.427e-05	no	no	no		CFD1	6.228e-05	no	no	no
DBY	5.241e-05	no	no	no		FLJ10496	5.427e-05	no	no	no		HURP	6.226e-05	no	no	no
DEXRAS1	5.241e-05	no	no	no		ARIA	5.426e-05	no	no	no		KIAA1874	6.225e-05	no	no	no
MGC15875	5.241e-05	no	no	no		PERB11	5.426e-05	no	no	no		GNT-IVB	6.224e-05	no	no	no
T2R23	5.241e-05	no	no	no		GOLGA6B	5.426e-05	no	no	no		SPAX5	6.224e-05	no	no	no
CHET9	5.24e-05	no	no	no		TM4SF5	5.425e-05	no	no	no		HCAP1	6.223e-05	no	no	no
CUL4A	5.239e-05	no	no	no		CD264	5.424e-05	no	no	no		COL4A5	6.221e-05	no	Yes	no
CHKB-CPT1B	5.239e-05	no	no	no		BAF250A	5.424e-05	no	no	no		DTDST	6.22e-05	no	no	no
MGC71999	5.239e-05	no	no	no		HG27	5.424e-05	no	no	no		Rpn2	6.219e-05	no	no	no
ROBPI	5.238e-05	no	no	no		ZNF916A	5.423e-05	no	no	no		NCM1	6.218e-05	no	no	no
LOC728621	5.238e-05	no	no	no		OR19-B	5.423e-05	no	no	no		TOM22	6.218e-05	no	no	no
KIAA0978	5.238e-05	no	no	no		BRCC36	5.421e-05	no	no	no		PSSALRE	6.218e-05	no	no	no
CD168	5.238e-05	no	no	no		MGC33367	5.421e-05	no	no	no		REV-ERBAALPHA	6.218e-05	no	no	no
VEGFR1	5.237e-05	no	no	no		FLJ23458	5.419e-05	no	no	no		FLJ10647	6.216e-05	no	no	no
IGLON2	5.237e-05	no	no	no		FLJ36890	5.419e-05	no	no	no		BYSL	6.215e-05	no	no	no
LINC00514	5.236e-05	no	no	no		EM:AB023052	5.418e-05	no	no	no		TPO1	6.215e-05	no	no	no
ERICH1	5.235e-05	no	no	no		HU-2	5.418e-05	no	no	no		P80-COILIN	6.215e-05	no	no	no
TRH1	5.235e-05	no	no	no		QKI	5.418e-05	no	Yes	no		TGE	6.215e-05	no	no	no
UNC112B	5.233e-05	no	no	no		STK37	5.418e-05	no	no	no		IPCA-5	6.215e-05	no	no	no
PHGR1	5.233e-05	no	no	no		Cdc42GAP	5.417e-05	no	no	no		UDRPASE	6.214e-05	no	no	no
GPR35	5.233e-05	no	no	no		TP40	5.417e-05	no	no	no		FLJ13291	6.213e-05	no	no	no
LPAAT-ALPHA	5.233e-05	no	no	no		MGC126219	5.416e-05	no	no	no		DKFZP566B183	6.211e-05	no	no	no
CRYG2	5.232e-05	no	no	no		PHGR1	5.416e-05	no	no	no		OLFMF3	6.211e-05	no	no	no
STEPP	5.23e-05	no	no	no		RP1-159A19	5.415e-05	no	no	no		FLJ46346	6.21e-05	no	no	no
CCDC161	5.23e-05	no	no	no		MGC111763	5.415e-05	no	no	no		TFB2	6.21e-05	no	no	no
CD72B	5.229e-05	no	no	no		ATPO	5.414e-05	no	no	no		CATSPER	6.209e-05	no	no	no
PDLIM5	5.228e-05	Yes	no	no		EPDR	5.413e-05	no	no	no		KIAA1514	6.209e-05	no	no	no
DJ139D8	5.228e-05	no	no	no		KIAA1981	5.412e-05	no	no	no		LEO1	6.208e-05	no	no	no
MGC17839	5.225e-05	no	no	no		ARHGEF10	5.412e-05	no	Yes	no		KIAA1227	6.206e-05	no	no	no
FLJ20084	5.225e-05	no	no	no		BRIGHT	5.411e-05	no	no	no		CMH10	6.205e-05	no	no	no
SKB1HS	5.224e-05	no	no	no		SIMRP7	5.411e-05	no	no	no		DUOXA2	6.204e-05	no	no	no
ANAMORSIN	5.224e-05	no	no	no		FPG1	5.41e-05	no	no	no		HSPH2	6.204e-05	no	no	no
RGS14	5.224e-05	no	no	no		CHET9	5.41e-05	no	no	no		TTC9A	6.204e-05	no	no	no
CLUH	5.224e-05	no	no	no		PINT1	5.409e-05	no	no	no		DKFZP686F0810	6.204e-05	no	no	no
AMOG	5.224e-05	no	no	no		FLJ36070	5.409e-05	no	no	no		ARHGAP45	6.203e-05	no	no	no
KIAA0436	5.224e-05	no	no	no		MPHOSPH6	5.407e-05	no	no	no		WAFL	6.201e-05	no	no	no
DIC2	5.224e-05	no	no	no		CCRK	5.407e-05	no	no	no		PEBP2A3	6.201e-05	no	no	no
GERP	5.222e-05	no	no	no		KMT5B	5.407e-05	no	no	no		GPATCH6	6.2e-05	no	no	no
LAS21	5.221e-05	no	no	no		UTP30	5.406e-05	no	no	no		ARHGEF10	6.2e-05	no	Yes	no
FLJ30401	5.221e-05	no	no	no		DKFZP686F0810	5.404e-05	no	no	no		NPTXR	6.2e-05	no	no	no
APITD1-CORT	5.221e-05	no	no	no		CAGL114	5.402e-05	no	no	no		MPRG	6.196e-05	no	no	no
LYZL7	5.221e-05	no	no	no		MAPTIT	5.401e-05	no	no	no		CILD24	6.196e-05	no	no	no
C5ORF65	5.219e-05	no	no	no		EMS1	5.401e-05	no	no	no		MGC2494	6.196e-05	no	no	no
PR61G	5.219e-05	no	no	no		MTGMP	5.399e-05	no	no	no		FHX	6.194e-05	no	no	no
SGK495	5.219e-05	no	no	no		HSLO-BETA	5.399e-05	no	no	no		CSAA	6.194e-05	no	no	no
FADS6	5.218e-05	no	no	no		LDLRAD2	5.399e-05	no	no	no		MC4R	6.194e-05	no	no	no
GALNAC6S	5.218e-05	no	no	no		MGC13010	5.398e-05	no	no	no		KIAA1286	6.193e-05	no	no	no
FLJ00065	5.217e-05	no	no	no		NKX4-1	5.397e-05	no	no	no		NMELV	6.191e-05	no	no	no
FLJ40362	5.217e-05	no	no	no		FUBP2	5.397e-05	no	no	no		MGC40555	6.191e-05	no	no	no
S28	5.217e-05	no	no	no		WBP-2	5.395e-05	no	no	no		RBEL1	6.191e-05	no	no	no
HOX3D	5.217e-05	no	no	no		PPP1R53	5.395e-05	no	no	no		ELG1	6.191e-05	no	no	no
DCUN1D2	5.217e-05	no	Yes	Yes		UIF	5.393e-05	no	no	no		ZFP46	6.191e-05	no	no	no
SNRNP110	5.217e-05	no	no	no		MSPL	5.393e-05	no	no	no		C6ORF145	6.191e-05	no	no	no
HC7-I	5.211e-05	no	no	no		PPP1R109	5.393e-05	no	no	no		P2Y11	6.191e-05	no	no	no
TRP14	5.21e-05	no	no	no		KOX32	5.392e-05	no	no	no		DKFZP761M2312	6.19e-05	no	no	no
PIPPIN	5.21e-05	no	no	no		HSIAH1	5.391e-05	no	no	no		HAGH1	6.19e-05	no	no	no
GALNAC-T16	5.21e-05	no	no	no		DKFZP434B044	5.39e-05	no	no	no		NP55	6.189e-05	no	no	no
NM15	5.21e-05	no	no	no		ZASP	5.39e-05	no	no	no		MAPKAPK2	6.189e-05	no	no	no
TMEM112B	5.209e-05	no	no	no		PFKP	5.39e-05	no	Yes	no		TNDM2	6.189e-05	no	no	no
LOC93622	5.209e-05	no	no	no		DJ1103G7	5.39e-05	no	no	no		IL1RL1L	6.189e-05	no	no	no
DJ366N23	5.207e-05	no	no	no		CD349	5.389e-05	no	no	no		PRED71	6.188e-05	no	no	no
KCNQ5	5.207e-05	no	Yes	no		MGC26259	5.389e-05	no	no	no		MTQ1	6.188e-05	no	no	no
DKFZP434E229	5.206e-05	no	no	no		RBM7	5.389e-05	no	no	no		RPB3	6.186e-05	no	no	no
D15WSU75E	5.206e-05	no	no	no		HST2697	5.389e-05	no	no	no		SPI-1	6.184e-05	no	no	no
FLJ21281	5.206e-05	no	no	no		ILDR3	5.389e-05	no	no	no		CGI-114	6.184e-05	no	no	no
WAP2	5.205e-05	no	no	no		NFAT1	5.388e-05	no	no	no		PRED77	6.184e-05	no	no	no
MGC14804	5.204e-05	no	no	no		L28	5.388e-05	no	no	no		FLJ10349	6.183e-05	no	no	no
IBP160	5.204e-05	no	no	no		EX33	5.386e-05	no	no	no		PILOT	6.181e-05	no	no	no
BCX105N19	5.203e-05	no	no	no		MGC52498	5.386e-05	no	no	no		MAN1B	6.181e-05	no	no	no
NFAR-1	5.202e-05	no	no	no		KIAA1968	5.385e-05	no	no	no		CACNA1C	6.179e-05	Yes	Yes	Yes
KIAA0404	5.201e-05	no	no	no		PPT2	5.385e-05	no	no	no		EAAT4	6.178e-05	no	no	no
DJ391O22	5.201e-05	no	no	no		PARVG	5.385e-05	no	no	no		FLJ37794	6.178e-05	no	no	no
EMSY	5.2e-05	no	no	no		FIAF	5.384e-05	no	no	no		FBL16	6.176e-05	no	no	no
ATPIB	5.199e-05	no	no	no		TMEM224	5.384e-05	no	no	no		RET1	6.176e-05	no	no	no
PAR-6B	5.198e-05	no	no	no		LPAAT-GAMMA	5.383e-05	no	no	no		MEK2	6.175e-05	no	no	no
HUFI-1	5.198e-05	no	no	no		NEM4	5.382e-05	no	no	no		BDB1	6.174e-05	no	no	no
SPEC2	5.197e-05	no	no	no		PDCD6	5.382e-05	no	Yes	Yes		PPP1R68	6.173e-05	no	no	no
BDAG1	5.197e-05	no	no	no		BK	5.38e-05	no	no	no		MGC7807	6.173e-05	no	no	no
FLJ20159	5.197e-05	no	no	no		CHRNA5	5.38e-05	no	no	no		DNCI2	6.173e-05	no	no	no
KIAA1991	5.196e-05	no	no	no		PDZD7C	5.38e-05	no	no	no		KIAA1317	6.173e-05	no	no	no
TCAB1	5.196e-05	no	no	no		PATZ2	5.38e-05	no	no	no		SGK495	6.17e-05	no	no	no
FLJ38932	5.196e-05	no	no	no		HR-PTPU	5.38e-05	no	no	no		AREC3	6.17e-05	no	no	no
PLCB3	5.196e-05	no	no	no		IP3-3KA	5.379e-05	no	no	no		SERHL2	6.169e-05	no	no	no
MGC2734	5.194e-05	no	no	no		ZNEU1	5.379e-05	no	no	no		EOAHA	6.168e-05	no	no	no
T-PLASTIN	5.192e-05	no	no	no		RTEL1-TNFRSF6B	5.379e-05	no	no	no		FLJ13703	6.166e-05	no	no	no
ZFYVE4	5.191e-05	no	no	no		SAPK-3	5.378e-05	no	no	no		GSTM4	6.166e-05	no	no	no
MGC2487	5.19e-05	no	no	no		MGC35570	5.378e-05	no	no	no		RNF38	6.166e-05	no	no	no
GSTM4	5.19e-05	no	no	no		HIGIRK2	5.376e-05	no	no	no		RP47	6.165e-05	no	no	no
TIEG1	5.188e-05	no	no	no		IP3R3	5.375e-05	no	no	no		BCOX	6.164e-05	no	no	no
CREBRF	5.188e-05	no	no	no		GOLGA6D	5.375e-05	no	no	no		NSMASE2	6.164e-05	no	no	no
GIII-SPLA2	5.188e-05	no	no	no		KAP17	5.373e-05	no	no	no		SMC	6.163e-05	no	no	no
SKY	5.188e-05	no	no	no		KIAA1874	5.372e-05	no	no	no		LERK-8	6.163e-05	no	no	no
SNAT	5.187e-05	no	no	no		PNSP-2	5.372e-05	no	no	no		NIPA	6.161e-05	no	no	no
TPO1	5.186e-05	no	no	no		MAP1L	5.372e-05	no	no	no		C10orf32-ASMT	6.161e-05	no	no	no
NSD3	5.185e-05	no	no	no		ZSCAN8	5.372e-05	no	no	no		PAC1R	6.161e-05	no	no	no
LOC645359	5.185e-05	no	no	no		MURF-3	5.37e-05	no	no	no		BA507D14	6.16e-05	no	no	no
C22ORF7	5.184e-05	no	no	no		lnc-PRR15-6	5.37e-05	no	Yes	no		Gsp1	6.16e-05	no	no	no
RAD4	5.184e-05	no	no	no		RLIP76	5.37e-05	no	no	no		PIF79	6.159e-05	no	no	no
PHAPI2	5.184e-05	no	no	no		TFB2	5.369e-05	no	no	no		FCHO2	6.158e-05	no	no	no
FLJ25005	5.181e-05	no	no	no		MTMR6	5.369e-05	no	no	no		CD179A	6.158e-05	no	no	no
KIAA0828	5.181e-05	no	no	no		MGC4171	5.366e-05	no	no	no		JMJD7	6.158e-05	no	no	no
GAPIII	5.18e-05	no	no	no		PMSA2	5.366e-05	no	no	no		IRKK	6.155e-05	no	no	no
ACSVL4	5.18e-05	no	no	no		TPI1	5.365e-05	no	no	no		NPD007	6.155e-05	no	no	no
MB1	5.18e-05	no	no	no		FINGER1	5.364e-05	no	no	no		MFAP4	6.155e-05	no	no	no
RPL39L1	5.179e-05	no	no	no		LASS6	5.363e-05	no	no	no		FLJ20259	6.154e-05	no	no	no
TFB2	5.177e-05	no	no	no		IOP1	5.363e-05	no	no	no		KIAA0173	6.153e-05	no	no	no
GLOD1	5.176e-05	no	no	no		IFITMD3	5.361e-05	no	no	no		PCAD	6.15e-05	no	no	no
RALGAPBETA	5.175e-05	no	no	no		GALIG	5.361e-05	no	no	no		AP3D1	6.15e-05	no	Yes	no
TB4Y	5.175e-05	no	no	no		FM08	5.36e-05	no	no	no		SDR9C4	6.143e-05	no	no	no
ZFP750	5.175e-05	no	no	no		PHAPI2	5.359e-05	no	no	no		MGC:39976	6.143e-05	no	no	no
TSPAN26	5.175e-05	no	no	no		RSC1A1	5.358e-05	no	no	no		KIAA1207	6.141e-05	no	no	no
FLJ11004	5.175e-05	no	no	no		FNBP1	5.357e-05	Yes	no	no		RPL30	6.141e-05	no	no	no
KIAA1594	5.173e-05	no	no	no		BSX1	5.356e-05	no	no	no		RIBA	6.141e-05	no	no	no
NGB	5.171e-05	no	no	no		LGTN	5.356e-05	no	no	no		IHPK2	6.14e-05	no	no	no
D2S1471	5.171e-05	no	no	no		FLJ20568	5.354e-05	no	no	no		NCS-1	6.14e-05	no	no	no
RRF	5.17e-05	no	no	no		SIT1	5.353e-05	no	no	no		MGC13183	6.139e-05	no	no	no
VARTUL	5.167e-05	no	no	no		DKFZP686E2433	5.352e-05	no	no	no		IFRC	6.138e-05	no	no	no
HOX3B	5.166e-05	no	no	no		ATP2B4	5.352e-05	no	Yes	no		SGK269	6.138e-05	no	no	no
WBP-2	5.165e-05	no	no	no		FAM77A	5.352e-05	no	no	no		RPN5	6.138e-05	no	no	no
JMJD7	5.163e-05	no	no	no		KIAA1665	5.35e-05	no	no	no		CT129	6.134e-05	no	no	no
KIAA1855	5.162e-05	no	no	no		ERBA-BETA	5.35e-05	no	no	no		3OST2	6.134e-05	no	no	no
SHB	5.162e-05	no	no	no		TDRD19A	5.349e-05	no	no	no		CSPGCP	6.133e-05	no	no	no
PRELID4B	5.162e-05	no	no	no		MDC1C	5.348e-05	no	no	no		CD102	6.133e-05	no	no	no
FLJ21739	5.161e-05	no	no	no		FLOT1	5.348e-05	no	no	no		LINK-GEFII	6.13e-05	no	no	no
FLJ39091	5.16e-05	no	no	no		SCOP	5.347e-05	no	no	no		KMT5C	6.129e-05	no	no	no
APRT	5.16e-05	no	no	no		FLJ10567	5.347e-05	no	no	no		FNBP1	6.125e-05	Yes	no	no
FBXL6	5.159e-05	no	no	no		GLUN2C	5.346e-05	no	no	no		MGC19907	6.125e-05	no	no	no
MYHC-PN	5.158e-05	no	no	no		DKFZP761M2312	5.346e-05	no	no	no		YKL40	6.125e-05	no	no	no
CYC	5.157e-05	no	no	no		KIAA1599	5.345e-05	no	no	no		WINS1	6.124e-05	no	no	no
RIBA	5.157e-05	no	no	no		TPS2	5.345e-05	no	no	no		ZNF851	6.124e-05	no	no	no
NPM2	5.156e-05	no	no	no		CACN4	5.345e-05	no	no	no		KIAA0234	6.123e-05	no	no	no
MTRNR2L1	5.156e-05	no	Yes	no		MTCP1NB	5.344e-05	no	no	no		HST1707	6.121e-05	no	no	no
ZIP14	5.155e-05	no	no	no		NLIIF	5.344e-05	no	no	no		ARRDC5	6.12e-05	no	no	no
PBMUCL1	5.155e-05	no	no	no		IFITMD4	5.343e-05	no	no	no		CIA1	6.12e-05	no	no	no
LYGH	5.155e-05	no	no	no		EDDM9	5.343e-05	no	no	no		APPL	6.119e-05	no	no	no
HEK3	5.155e-05	no	no	no		SBBI26	5.343e-05	no	no	no		PNSP-2	6.119e-05	no	no	no
MGC111222	5.154e-05	no	no	no		CD179A	5.342e-05	no	no	no		PFD6	6.119e-05	no	no	no
D11S4896E	5.154e-05	no	no	no		KA1	5.342e-05	no	no	no		DRG2	6.118e-05	no	no	no
KIAA1080	5.152e-05	no	no	no		MARAPSIN	5.341e-05	no	no	no		FLJ13289	6.116e-05	no	no	no
CORS1	5.152e-05	no	no	no		CI-39K	5.341e-05	no	no	no		ARPP	6.115e-05	no	no	no
FLJ10547	5.151e-05	no	no	no		LAS21	5.34e-05	no	no	no		SNURPORTIN1	6.115e-05	no	no	no
SCC-S2	5.15e-05	no	no	no		MEGANE	5.34e-05	no	no	no		UQCR4	6.115e-05	no	no	no
CPLA2-GAMMA	5.15e-05	no	no	no		SPATS2	5.34e-05	no	Yes	no		IP90	6.114e-05	no	no	no
GRCC8	5.15e-05	no	no	no		MGC17791	5.338e-05	no	no	no		FLJ14802	6.113e-05	no	no	no
KIAA0819	5.149e-05	no	no	no		HSPC252	5.338e-05	no	no	no		CAIX	6.113e-05	no	no	no
HLA-DOB	5.149e-05	no	no	no		ARFGAP3	5.338e-05	no	no	no		ZNF517	6.113e-05	no	no	no
TAFI	5.148e-05	no	no	no		STRAD	5.336e-05	no	no	no		FAM161C	6.113e-05	no	no	no
FLJ36070	5.148e-05	no	no	no		AP-1	5.336e-05	no	no	no		CREBRF	6.11e-05	no	no	no
DKFZP686J07229	5.148e-05	no	no	no		ZACRP4	5.336e-05	no	no	no		FLJ20092	6.109e-05	no	no	no
FLJ44612	5.148e-05	no	no	no		FLJ13906	5.335e-05	no	no	no		MGC4631	6.109e-05	no	no	no
TAS2R10	5.147e-05	no	Yes	no		SBK	5.335e-05	no	no	no		FLJ23142	6.109e-05	no	no	no
MGC13183	5.147e-05	no	no	no		DP5	5.335e-05	no	no	no		FLJ13725	6.109e-05	no	no	no
KIAA0680	5.147e-05	no	no	no		8HS20	5.335e-05	no	no	no		IL11RA	6.108e-05	no	no	no
CALML3	5.146e-05	no	no	no		FRCL1	5.335e-05	no	no	no		CT65	6.108e-05	no	no	no
LYP2	5.146e-05	no	no	no		MGC30156	5.334e-05	no	no	no		ZNF418	6.106e-05	no	Yes	no
LNOX1	5.145e-05	no	no	no		ENOVIN	5.332e-05	no	no	no		SFXN4	6.106e-05	no	no	no
DKFZP434K114	5.144e-05	no	no	no		C21ORF102	5.331e-05	no	no	no		PTPE	6.105e-05	no	no	no
MGC35423	5.144e-05	no	no	no		FLJ21918	5.33e-05	no	no	no		NSE4B	6.105e-05	no	no	no
PAS1C1	5.143e-05	no	no	no		MSK	5.329e-05	no	no	no		BRE2	6.105e-05	no	no	no
DRASIC	5.142e-05	no	no	no		SYNJ2BP-COX16	5.329e-05	no	no	no		FLJ22938	6.105e-05	no	no	no
ANX7	5.141e-05	no	no	no		DBY	5.329e-05	no	no	no		FLJ31529	6.104e-05	no	no	no
RPTPA	5.14e-05	no	no	no		MGC13017	5.328e-05	no	no	no		DKFZP434P086	6.104e-05	no	no	no
WSTF	5.14e-05	no	no	no		NOX5B	5.327e-05	no	no	no		SLC39A5	6.103e-05	no	no	no
UBXDC2	5.139e-05	no	no	no		GSTM4	5.326e-05	no	no	no		KIAA0842	6.103e-05	no	no	no
ADGF	5.138e-05	no	no	no		IMPA2	5.326e-05	no	no	no		DC44	6.101e-05	no	no	no
H3P	5.136e-05	no	no	no		ACCPN	5.325e-05	no	no	no		P38DELTA	6.101e-05	no	no	no
ALDH8	5.136e-05	no	no	no		P21CIP1/WAF1	5.325e-05	no	no	no		7-60	6.101e-05	no	no	no
MGC32104	5.134e-05	no	no	no		FCHO2	5.323e-05	no	no	no		MGC51025	6.101e-05	no	no	no
PDIA9	5.134e-05	no	no	no		GOLGA8J	5.323e-05	no	no	no		MRPL27	6.099e-05	no	no	no
HSBG	5.132e-05	no	no	no		KIAA0558	5.322e-05	no	no	no		CD107A	6.098e-05	no	no	no
GAT3	5.132e-05	no	no	no		NUP96	5.322e-05	no	no	no		GOLGA6L18	6.095e-05	no	no	no
CD156C	5.132e-05	no	no	no		ES18	5.321e-05	no	no	no		RRF	6.094e-05	no	no	no
KCNIP2	5.132e-05	Yes	no	no		AIP2	5.321e-05	no	no	no		NKG2-F	6.094e-05	no	no	no
MEDA-7	5.131e-05	no	no	no		C316G12	5.32e-05	no	no	no		NMIG	6.093e-05	no	no	no
EM:AB023051	5.13e-05	no	no	no		MANSC2	5.32e-05	no	no	no		KV6	6.091e-05	no	no	no
MRPL35	5.129e-05	no	no	no		KAP16	5.32e-05	no	no	no		CXCDC2	6.091e-05	no	no	no
FLJ20452	5.127e-05	no	no	no		AQP5	5.319e-05	no	no	no		ZBTB22B	6.09e-05	no	no	no
BK125H2	5.127e-05	no	no	no		CARB	5.319e-05	no	no	no		ATP5G2	6.089e-05	no	no	no
FER	5.127e-05	no	Yes	Yes		CDHR12	5.319e-05	no	no	no		RC-74	6.089e-05	no	no	no
IDDM10	5.127e-05	no	no	no		NFAR-1	5.318e-05	no	no	no		DGT3	6.088e-05	no	no	no
KIAA0945	5.126e-05	no	no	no		HLA-DOB	5.317e-05	no	no	no		RCK	6.085e-05	no	no	no
HASPIN	5.126e-05	no	no	no		LC27	5.317e-05	no	no	no		TCEB2	6.084e-05	no	no	no
CWH43-N	5.121e-05	no	no	no		COE2	5.315e-05	no	no	no		MGC2668	6.084e-05	no	no	no
BBS4	5.119e-05	no	no	no		TGFA	5.315e-05	no	no	no		FLJ40365	6.084e-05	no	no	no
CDHR14	5.119e-05	no	no	no		TWA1	5.315e-05	no	no	no		RNA5SP366	6.084e-05	no	Yes	no
CRIK	5.119e-05	no	no	no		DJ543J19	5.315e-05	no	no	no		FLJ23436	6.083e-05	no	no	no
F2	5.118e-05	no	no	no		CI-MNLL	5.314e-05	no	no	no		B14	6.081e-05	no	no	no
MGC138504	5.118e-05	no	no	no		PBMUCL1	5.314e-05	no	no	no		BETA3GN-T4	6.081e-05	no	no	no
SRE-ZBP	5.117e-05	no	no	no		FLJ39553	5.313e-05	no	no	no		PATZ	6.08e-05	no	no	no
XB	5.117e-05	no	no	no		PPP1R126	5.313e-05	no	no	no		DBC2	6.08e-05	no	no	no
WNT7B	5.116e-05	no	no	no		PPP1R124	5.312e-05	no	no	no		FLJ20084	6.08e-05	no	no	no
RAP55B	5.115e-05	no	no	no		PARP13	5.312e-05	no	no	no		FLJ25765	6.08e-05	no	no	no
IAN7	5.114e-05	no	no	no		DMP4	5.311e-05	no	no	no		PP2BGAMMA	6.08e-05	no	no	no
RFC40	5.114e-05	no	no	no		FHX	5.309e-05	no	no	no		CUL1	6.079e-05	no	no	no
BA12D24	5.113e-05	no	no	no		NAGT	5.309e-05	no	no	no		ZNF828	6.079e-05	no	no	no
VR20	5.113e-05	no	no	no		UBPH	5.309e-05	no	no	no		PDE9A	6.079e-05	no	no	no
C21ORF78	5.112e-05	no	no	no		FAM227A	5.308e-05	no	no	no		HT012	6.078e-05	no	no	no
STAT5	5.109e-05	no	no	no		BA234K24	5.307e-05	no	no	no		RNF93	6.078e-05	no	no	no
HERA-B	5.109e-05	no	no	no		GLUN1	5.307e-05	no	no	no		HA-4	6.076e-05	no	no	no
FINGER1	5.109e-05	no	no	no		CFIM25	5.306e-05	no	no	no		FLJ46675	6.076e-05	no	no	no
SNT3	5.108e-05	no	no	no		KIAA1031	5.306e-05	no	no	no		TIMP3	6.075e-05	no	no	no
FLJ13291	5.108e-05	no	no	no		COL4A5	5.306e-05	no	Yes	no		CTPS2	6.074e-05	no	no	no
BL44	5.107e-05	no	no	no		CENP-35	5.305e-05	no	no	no		DKFZP586M1120	6.074e-05	no	no	no
C11ORF15	5.107e-05	no	no	no		ZBTB22B	5.303e-05	no	no	no		C21ORF83	6.074e-05	no	no	no
BARHL1	5.107e-05	no	no	no		LOC129881	5.302e-05	no	no	no		MG29	6.073e-05	no	no	no
SSH3BP2	5.105e-05	no	no	no		CD263	5.302e-05	no	no	no		SYNCOILIN	6.07e-05	no	no	no
FLJ23523	5.105e-05	no	no	no		FLJ00391	5.301e-05	no	no	no		UGCG	6.07e-05	no	no	no
HSD24	5.103e-05	no	no	no		HLA-DP1B	5.3e-05	no	no	no		ZBTB23	6.069e-05	no	no	no
KIAA0043	5.102e-05	no	no	no		MCG18	5.299e-05	no	no	no		RPL8	6.069e-05	no	no	no
FUBP2	5.102e-05	no	no	no		KIAA1384	5.299e-05	no	no	no		CCS	6.069e-05	no	no	no
HST17454	5.101e-05	no	no	no		GPRK6	5.298e-05	no	no	no		DKFZP434E2216	6.068e-05	no	no	no
RP53	5.101e-05	no	no	no		PIR51	5.297e-05	no	no	no		OTTHUMG00000013332	6.068e-05	no	no	no
HEM1	5.1e-05	no	no	no		FLJ10524	5.297e-05	no	no	no		FLJ30401	6.068e-05	no	no	no
PCAD	5.1e-05	no	no	no		MYO18B	5.296e-05	no	Yes	no		IBP160	6.068e-05	no	no	no
MGC2744	5.1e-05	no	no	no		ALS	5.295e-05	no	no	no		MGC35423	6.068e-05	no	no	no
BHLHE5	5.1e-05	no	no	no		P-REX1	5.294e-05	no	no	no		FLJ25609	6.066e-05	no	no	no
MTF1	5.099e-05	no	no	no		VRHO	5.294e-05	no	no	no		MGC2599	6.066e-05	no	no	no
M40	5.098e-05	no	no	no		FLJ10634	5.294e-05	no	no	no		SUN1	6.065e-05	no	Yes	no
NZF2	5.096e-05	no	no	no		SPDYE	5.293e-05	no	no	no		CK10	6.065e-05	no	no	no
STAF	5.094e-05	no	no	no		PRIM1	5.292e-05	no	no	no		FLJ12765	6.065e-05	no	no	no
HST19447	5.094e-05	no	no	no		MTMR7	5.292e-05	no	no	no		KIAA1982	6.065e-05	no	no	no
BCT2	5.094e-05	no	no	no		MGC12972	5.291e-05	no	no	no		PPP1R49	6.064e-05	no	no	no
C20ORF202	5.094e-05	no	no	no		MGC19600	5.29e-05	no	no	no		FLJ33970	6.063e-05	no	no	no
CT61	5.093e-05	no	no	no		TAPP1	5.289e-05	no	no	no		eIF3g	6.063e-05	no	no	no
INPP5G	5.092e-05	no	no	no		FLJ10534	5.289e-05	no	no	no		IL-10R2	6.063e-05	no	no	no
DAP-2	5.091e-05	no	no	no		RSPH12	5.286e-05	no	no	no		NGALNAC-T1	6.061e-05	no	no	no
SSAT2	5.091e-05	no	no	no		STAT5	5.285e-05	no	no	no		BA554C12	6.06e-05	no	no	no
SC5D	5.089e-05	no	no	no		TDRD20A	5.285e-05	no	no	no		CAH1	6.059e-05	no	no	no
2E4	5.089e-05	no	no	no		GPT1	5.285e-05	no	no	no		BBC1	6.058e-05	no	no	no
MANA	5.089e-05	no	no	no		C10orf62	5.284e-05	no	no	no		FLJ16786	6.056e-05	no	no	no
PMX2	5.088e-05	no	no	no		PIG3	5.283e-05	no	no	no		CDRT15L2	6.055e-05	no	no	no
lnc-ZNF623-2	5.088e-05	no	Yes	no		FSAP57	5.283e-05	no	no	no		FLAME-3	6.055e-05	no	no	no
FBW12	5.087e-05	no	no	no		DCDC2B	5.281e-05	no	no	no		APCL	6.055e-05	no	no	no
MGC9414	5.085e-05	no	no	no		IRLB	5.281e-05	no	no	no		HBUB1	6.054e-05	no	no	no
PILOT	5.085e-05	no	no	no		UBC1	5.281e-05	no	no	no		MGC71973	6.054e-05	no	no	no
SWAN-1	5.085e-05	no	no	no		KIAA0933	5.281e-05	no	no	no		ZNF900	6.053e-05	no	no	no
MAP3K18	5.085e-05	no	no	no		ATP6N1D	5.28e-05	no	no	no		JARID1A	6.051e-05	no	no	no
DKFZP761D081	5.085e-05	no	no	no		CX50	5.28e-05	no	no	no		TIEG1	6.05e-05	no	no	no
SEC53	5.085e-05	no	no	no		CR1L	5.279e-05	no	no	no		IPP2A2	6.05e-05	no	no	no
UDPASE	5.085e-05	no	no	no		C6ORF18	5.278e-05	no	no	no		MGC2454	6.05e-05	no	no	no
FLJ11323	5.085e-05	no	no	no		NET22	5.278e-05	no	no	no		HST17250	6.049e-05	no	no	no
SHCC	5.084e-05	no	no	no		EVA	5.278e-05	no	no	no		WDR86	6.048e-05	no	no	no
ZAKI-4	5.084e-05	no	no	no		MYLK5	5.277e-05	no	no	no		LDH6A	6.048e-05	no	no	no
TEF4	5.084e-05	no	no	no		SAP14A	5.277e-05	no	no	no		HOX3G	6.048e-05	no	no	no
ACC-2	5.082e-05	no	no	no		UNQ467	5.276e-05	no	no	no		YANK1	6.048e-05	no	no	no
DKFZP434E2216	5.082e-05	no	no	no		SCLIP	5.275e-05	no	no	no		HBZ-T1	6.046e-05	no	no	no
TAIFD	5.081e-05	no	no	no		HBA-T3	5.275e-05	no	no	no		HVSP41	6.045e-05	no	no	no
FUT12	5.08e-05	no	no	no		GTX	5.274e-05	no	no	no		PDE4DIP	6.044e-05	no	Yes	Yes
FLJ23458	5.079e-05	no	no	no		DJ238O23	5.274e-05	no	no	no		RUNDATAXIN	6.044e-05	no	no	no
OR19-B	5.078e-05	no	no	no		FLJ12732	5.273e-05	no	no	no		Vma6	6.044e-05	no	no	no
BHLHB27	5.078e-05	no	no	no		NS5ATP1	5.273e-05	no	no	no		SHB	6.044e-05	no	no	no
DJ223E5	5.077e-05	no	no	no		MTRNR2L1	5.273e-05	no	Yes	no		RK	6.043e-05	no	no	no
KIAA1367	5.076e-05	no	no	no		SKD1B	5.272e-05	no	no	no		MFRN1	6.043e-05	no	no	no
MGC15563	5.075e-05	no	no	no		KLS	5.272e-05	no	no	no		LRRC76	6.043e-05	no	no	no
CILD12	5.075e-05	no	no	no		OR10H4	5.271e-05	no	no	no		LOC100288332	6.043e-05	no	no	no
KA1	5.074e-05	no	no	no		FLJ40235	5.269e-05	no	no	no		BMRP-59B	6.041e-05	no	no	no
Rpn2	5.073e-05	no	no	no		MOCOD	5.269e-05	no	no	no		HPCN1	6.04e-05	no	no	no
P325	5.072e-05	no	no	no		DJ149A16	5.269e-05	no	no	no		INSL5	6.04e-05	no	no	no
FLJ20247	5.07e-05	no	no	no		RAD21L	5.268e-05	no	no	no		HUFI-1	6.04e-05	no	no	no
FLJ90167	5.069e-05	no	no	no		FLJ22257	5.268e-05	no	no	no		LOC51491	6.036e-05	no	no	no
FLJ12765	5.069e-05	no	no	no		eIF3g	5.268e-05	no	no	no		HST2697	6.036e-05	no	no	no
MGC26158	5.069e-05	no	no	no		FLJ10738	5.268e-05	no	no	no		SBBI81	6.036e-05	no	no	no
CMC3	5.067e-05	no	no	no		FGF21	5.267e-05	no	no	no		FLJ20159	6.035e-05	no	no	no
KIAA1941	5.066e-05	no	no	no		SDR9C3	5.267e-05	no	no	no		ALDH2	6.035e-05	no	no	no
ARHGEF10	5.066e-05	no	Yes	no		HS6M1-28	5.265e-05	no	no	no		EBBP	6.035e-05	no	no	no
MYEOV2	5.065e-05	no	no	no		M12	5.262e-05	no	no	no		FLJ90167	6.034e-05	no	no	no
FLJ23637	5.065e-05	no	no	no		ZNF900	5.261e-05	no	no	no		LCN9	6.034e-05	no	no	no
DC44	5.065e-05	no	no	no		FLJ34161	5.261e-05	no	no	no		HL11	6.034e-05	no	no	no
PIM	5.064e-05	no	no	no		PPP1R25	5.26e-05	no	no	no		NET35	6.034e-05	no	no	no
EFCAB14	5.063e-05	no	no	no		KIAA1317	5.26e-05	no	no	no		MGC17211	6.033e-05	no	no	no
PPP1R25	5.063e-05	no	no	no		PRKAR1B	5.258e-05	no	no	no		AFI1A	6.033e-05	no	no	no
TINAG	5.062e-05	no	no	no		KRTAP18-10	5.257e-05	no	no	no		CCZ1A	6.031e-05	no	no	no
LPAAT-GAMMA	5.061e-05	no	no	no		GNT-IVB	5.256e-05	no	no	no		BTRCP1	6.03e-05	no	no	no
CFIM25	5.061e-05	no	no	no		TAS2R10	5.255e-05	no	Yes	no		CR1L	6.03e-05	no	no	no
RAB22B	5.061e-05	no	no	no		ERK4	5.254e-05	no	no	no		LRPC21	6.029e-05	no	no	no
CHET8	5.06e-05	no	no	no		FLJ30002	5.253e-05	no	no	no		TDRD19A	6.029e-05	no	no	no
SH3KBP1	5.06e-05	Yes	no	no		HLUC7A	5.253e-05	no	no	no		DKFZP434E229	6.026e-05	no	no	no
SCC4	5.059e-05	no	no	no		TIM17A	5.252e-05	no	no	no		COL15A1	6.025e-05	no	no	no
KIAA0403	5.058e-05	no	no	no		NIPA	5.251e-05	no	no	no		MMP-28	6.025e-05	no	no	no
ROMK1	5.058e-05	no	no	no		5-HT3A	5.251e-05	no	no	no		C6orf229	6.024e-05	no	no	no
FLJ20092	5.058e-05	no	no	no		FLJ11323	5.25e-05	no	no	no		C10ORF120	6.023e-05	no	no	no
21-GARP	5.058e-05	no	no	no		LOC100996492	5.249e-05	no	no	no		RALGEF2	6.023e-05	no	no	no
OSTBETA	5.057e-05	no	no	no		DKFZP686O0457	5.249e-05	no	no	no		MTGMP	6.023e-05	no	no	no
HNRNP-R	5.056e-05	no	no	no		FLJ40363	5.248e-05	no	no	no		ARF4L	6.021e-05	no	no	no
BS69	5.055e-05	no	no	no		CD156C	5.248e-05	no	no	no		AAF132	6.021e-05	no	no	no
HKIB9	5.055e-05	no	no	no		UBE2G2	5.248e-05	no	Yes	no		PTGES3L	6.021e-05	no	no	no
CFAP22	5.055e-05	no	no	no		MGC40555	5.246e-05	no	no	no		WBP-2	6.02e-05	no	no	no
TPC2	5.055e-05	no	no	no		MGC26733	5.246e-05	no	no	no		ORMDL3	6.02e-05	no	no	no
DEP	5.054e-05	no	no	no		NET33	5.246e-05	no	no	no		SLC37A1	6.02e-05	no	no	no
GNB3	5.054e-05	no	no	no		MEK2	5.245e-05	no	no	no		MLIP	6.018e-05	no	Yes	no
ACCPN	5.053e-05	no	no	no		TP53I2	5.245e-05	no	no	no		TOM1L2	6.018e-05	no	no	no
MDN	5.051e-05	no	no	no		RPL30	5.242e-05	no	no	no		GRC3	6.016e-05	no	no	no
MKLP-1	5.049e-05	no	no	no		KIAA1740	5.242e-05	no	no	no		PIGR	6.016e-05	no	no	no
FIGLER6	5.048e-05	no	no	no		RGS6	5.241e-05	no	no	no		DCDC2B	6.015e-05	no	no	no
FBXL7	5.048e-05	no	Yes	Yes		AP-O	5.241e-05	no	no	no		SEC5P	6.015e-05	no	no	no
KIAA0678	5.047e-05	no	no	no		GLTPD2	5.241e-05	no	no	no		FLJ13451	6.015e-05	no	no	no
COLLIGEN	5.047e-05	no	no	no		LSR68	5.241e-05	no	no	no		D2S1471	6.014e-05	no	no	no
ZO-3	5.047e-05	no	no	no		PTP1B	5.241e-05	no	no	no		DLL1	6.014e-05	no	no	no
SP-22	5.045e-05	no	no	no		NTN5	5.24e-05	no	no	no		POLN	6.013e-05	no	no	no
OR17-16	5.045e-05	no	no	no		PRKG1	5.239e-05	no	Yes	no		GLUN2C	6.013e-05	no	no	no
FLJ38116	5.044e-05	no	no	no		GK001	5.239e-05	no	no	no		OST713	6.013e-05	no	no	no
ZDHHC24	5.044e-05	no	no	no		BA269C23	5.237e-05	no	no	no		CEMENTOIN	6.013e-05	no	no	no
UNQ9217	5.044e-05	no	no	no		ZFP750	5.237e-05	no	no	no		SNAT	6.011e-05	no	no	no
HU-2	5.044e-05	no	no	no		WNT8B	5.237e-05	no	no	no		FLJ23259	6.011e-05	no	no	no
GPR38	5.044e-05	no	no	no		TCC52	5.237e-05	no	no	no		ADPRTL2	6.011e-05	no	no	no
SRRP37	5.042e-05	no	no	no		C3ORF70	5.236e-05	no	no	no		C12ORF6	6.011e-05	no	no	no
CP107	5.042e-05	no	no	no		BCL-RAMBO	5.235e-05	no	no	no		2E4	6.01e-05	no	no	no
ACOX3	5.042e-05	no	Yes	no		CALML3	5.234e-05	no	no	no		ZMIZ6	6.01e-05	no	no	no
KV6	5.042e-05	no	no	no		TOP1MT	5.234e-05	no	no	no		XTP12	6.01e-05	no	no	no
C9ORF171	5.041e-05	no	no	no		CT21	5.233e-05	no	no	no		TRAF4AF1	6.01e-05	no	no	no
WRCH2	5.04e-05	no	no	no		PBX4	5.233e-05	no	no	no		OASIS	6.009e-05	no	no	no
PEG1	5.038e-05	no	no	no		CDHR14	5.233e-05	no	no	no		BPH-RP	6.009e-05	no	no	no
SODD	5.037e-05	no	no	no		DFNB36	5.233e-05	no	no	no		FLJ14840	6.008e-05	no	no	no
C22ORF15	5.037e-05	no	no	no		MGC26158	5.232e-05	no	no	no		BK125H2	6.008e-05	no	no	no
PTG	5.036e-05	no	no	no		CC16	5.232e-05	no	no	no		PBX4	6.006e-05	no	no	no
NPD007	5.036e-05	no	no	no		E2-230K	5.23e-05	no	no	no		PRP-B	6.006e-05	no	no	no
KIAA1571	5.036e-05	no	no	no		AOAH	5.229e-05	no	no	no		FLJ30473	6.005e-05	no	no	no
HOX3A	5.036e-05	no	no	no		FLJ34389	5.229e-05	no	no	no		P85B	6.001e-05	no	no	no
CHOP	5.035e-05	no	no	no		CD4	5.228e-05	no	no	no		UBC	6.001e-05	no	no	no
DJ776F14	5.034e-05	no	no	no		CGI-56	5.227e-05	no	no	no		LRRFIP1	6.001e-05	no	Yes	no
KIAA0652	5.034e-05	no	no	no		TOSO	5.226e-05	no	no	no		ES18	6e-05	no	no	no
MGC126064	5.033e-05	no	no	no		MTRNR2L2	5.226e-05	no	Yes	no		RYA3	6e-05	no	no	no
KIAA0806	5.033e-05	no	no	no		UBC9	5.225e-05	no	no	no		IOP1	6e-05	no	no	no
KIAA1601	5.031e-05	no	no	no		CACNLG	5.225e-05	no	no	no		MAPTIT	5.999e-05	no	no	no
MGC149868	5.031e-05	no	no	no		BHLHB12	5.222e-05	no	no	no		TRAP240L	5.995e-05	no	no	no
CIP29	5.03e-05	no	no	no		RGS11	5.22e-05	no	no	no		COE2	5.995e-05	no	no	no
TC21	5.029e-05	no	no	no		H3P	5.22e-05	no	no	no		ZNF356	5.994e-05	no	no	no
ATG18B	5.029e-05	no	no	no		KIAA1287	5.219e-05	no	no	no		GNAZ	5.994e-05	no	no	no
YKL40	5.028e-05	no	no	no		ROLT	5.218e-05	no	no	no		OR10A4P	5.994e-05	no	no	no
BMAC	5.028e-05	no	no	no		NSRD2	5.218e-05	no	no	no		DJ337H4	5.993e-05	no	no	no
BHLHE78	5.028e-05	no	no	no		RNF66	5.218e-05	no	no	no		PLEIAD	5.991e-05	no	no	no
ENIGMA	5.026e-05	no	no	no		FLJ14744	5.218e-05	no	no	no		CKMT1	5.991e-05	no	no	no
C8ORF82	5.026e-05	no	no	no		WIF1	5.217e-05	no	no	no		GUCA2B	5.991e-05	no	no	no
CI-13KA	5.025e-05	no	no	no		DUX4L24	5.217e-05	no	no	no		LAS21	5.99e-05	no	no	no
WNT3A	5.025e-05	no	no	no		KIAA1828	5.216e-05	no	no	no		DYF13	5.99e-05	no	no	no
HBUB1	5.025e-05	no	no	no		DJ616B8	5.216e-05	no	no	no		KIAA1691	5.99e-05	no	no	no
HL14	5.024e-05	no	no	no		STMY3	5.215e-05	no	no	no		BRICD2C	5.99e-05	no	no	no
SM-D2	5.024e-05	no	no	no		PIS	5.215e-05	no	no	no		CHGN	5.989e-05	no	no	no
KIAA0410	5.024e-05	no	no	no		ZNF851	5.214e-05	no	no	no		H-B	5.989e-05	no	no	no
FAP133	5.022e-05	no	no	no		8D6A	5.214e-05	no	no	no		P21CIP1/WAF1	5.988e-05	no	no	no
HCA66	5.022e-05	no	no	no		HP1HS-GAMMA	5.213e-05	no	no	no		DKFZP586L0724	5.988e-05	no	no	no
CD362	5.022e-05	no	no	no		KLP-11	5.212e-05	no	no	no		CUL4A	5.986e-05	no	no	no
PLCD4	5.022e-05	no	no	no		C8ORF82	5.21e-05	no	no	no		ZFYVE4	5.985e-05	no	no	no
FLJ11838	5.021e-05	no	no	no		EST123147	5.21e-05	no	no	no		IDE	5.985e-05	no	no	no
4P11	5.021e-05	no	no	no		MDAC1	5.209e-05	no	no	no		HMCD	5.984e-05	no	no	no
P450SCC	5.021e-05	no	no	no		T2R23	5.208e-05	no	no	no		CRYGN	5.983e-05	no	no	no
RASI-1	5.021e-05	no	no	no		RBM12B	5.207e-05	no	no	no		PINT1	5.983e-05	no	no	no
KRT1-3	5.021e-05	no	no	no		SEC53	5.207e-05	no	no	no		WAP6	5.981e-05	no	no	no
HTID-1	5.02e-05	no	no	no		UBCH7	5.207e-05	no	no	no		GLUT11	5.981e-05	no	no	no
TXLNGX	5.019e-05	no	no	no		GPRK5	5.207e-05	no	no	no		ARMD7	5.981e-05	no	no	no
BMRP-59B	5.019e-05	no	no	no		PLGP1	5.206e-05	no	no	no		HK1	5.979e-05	no	no	no
BNIP3A	5.019e-05	no	no	no		ROMK1	5.206e-05	no	no	no		PI3K-C2BETA	5.979e-05	no	no	no
FLJ31164	5.019e-05	no	no	no		CENTD2	5.206e-05	no	no	no		HBA-T2	5.979e-05	no	no	no
RLIP76	5.018e-05	no	no	no		SPG63	5.205e-05	no	no	no		CA6	5.979e-05	no	no	no
SDS22	5.017e-05	no	no	no		RCOR-1	5.205e-05	no	no	no		PP12301	5.976e-05	no	no	no
UBPH	5.017e-05	no	no	no		CFAP111	5.205e-05	no	no	no		FLJ40217	5.976e-05	no	no	no
TOP1MT	5.017e-05	no	no	no		MGC149526	5.205e-05	no	no	no		SKM1	5.976e-05	no	no	no
GPRK5	5.016e-05	no	no	no		FLJ21709	5.204e-05	no	no	no		PRSS45	5.976e-05	no	Yes	no
PPP1R67	5.016e-05	no	no	no		GIP	5.203e-05	no	no	no		MGC39650	5.976e-05	no	no	no
LCCS3	5.014e-05	no	no	no		O/E-4	5.202e-05	no	no	no		BA119F7	5.975e-05	no	no	no
C-ABL	5.014e-05	no	no	no		CCP2	5.202e-05	no	no	no		PCDHY	5.975e-05	no	no	no
DJ402G11	5.013e-05	no	no	no		INPP5	5.202e-05	no	no	no		PEX14	5.975e-05	no	no	no
ATPO	5.011e-05	no	no	no		CARPX1	5.201e-05	no	no	no		P2U	5.974e-05	no	no	no
RTN3	5.011e-05	no	Yes	Yes		SIPL1	5.2e-05	no	no	no		SHCC	5.974e-05	no	no	no
GLYPICAN	5.011e-05	no	no	no		B19	5.2e-05	no	no	no		CAGL114	5.973e-05	no	no	no
SPTRX-3	5.01e-05	no	no	no		MICAL3	5.198e-05	no	Yes	no		LUC7	5.973e-05	no	no	no
SNURPORTIN1	5.01e-05	no	no	no		OBGH1	5.198e-05	no	no	no		HPS5	5.973e-05	no	no	no
S15	5.01e-05	no	no	no		NGB	5.198e-05	no	no	no		HST17016	5.973e-05	no	no	no
BBC2	5.009e-05	no	no	no		MGC2494	5.197e-05	no	no	no		CGI-92	5.973e-05	no	no	no
UBP-M	5.008e-05	no	no	no		KIAA0043	5.197e-05	no	no	no		OR17-40	5.971e-05	no	no	no
MRPL27	5.008e-05	no	no	no		ATP1AL1	5.197e-05	no	no	no		AGIF	5.971e-05	no	no	no
NET27	5.007e-05	no	no	no		FLJ10159	5.197e-05	no	no	no		STARA	5.97e-05	no	no	no
BETA4GAL-T7	5.006e-05	no	no	no		IPIA-ALPHA	5.196e-05	no	no	no		VR20	5.97e-05	no	no	no
FLJ25475	5.005e-05	no	no	no		RCK	5.195e-05	no	no	no		HGAA1	5.97e-05	no	no	no
CYB5-M	5.004e-05	no	no	no		DKFZP434E229	5.195e-05	no	no	no		DAP-AT	5.969e-05	no	no	no
HGH-N	5.003e-05	no	no	no		SDR12C3	5.195e-05	no	no	no		MTMR7	5.968e-05	no	no	no
DENND7B	5.002e-05	no	no	no		CYPL1	5.195e-05	no	no	no		NIPSNAP1	5.968e-05	no	no	no
MLLT10	5.002e-05	no	Yes	no		TP53I12	5.194e-05	no	no	no		FLJ41197	5.968e-05	no	no	no
CILD21	5.002e-05	no	no	no		FAM90A26P	5.192e-05	no	no	no		EIF2BGAMMA	5.966e-05	no	no	no
FLJ23436	5e-05	no	no	no		MFAP1	5.192e-05	no	no	no		MGC2744	5.964e-05	no	no	no
C14ORF152	5e-05	no	no	no		FLJ40752	5.192e-05	no	no	no		C14ORF164	5.964e-05	no	no	no
L10A	4.999e-05	no	no	no		FLJ10700	5.192e-05	no	no	no		ACTN1	5.964e-05	no	no	no
KCNF2	4.998e-05	no	no	no		CD246	5.192e-05	no	no	no		CYC	5.964e-05	no	no	no
ZBTB22B	4.998e-05	no	no	no		CFC	5.192e-05	no	no	no		ATP6GL	5.964e-05	no	no	no
BHLHB12	4.997e-05	no	no	no		ADPRTL2	5.191e-05	no	no	no		FLJ31740	5.961e-05	no	no	no
FAH	4.997e-05	no	no	no		C9ORF171	5.191e-05	no	no	no		ADRA1B	5.961e-05	no	no	no
CARB	4.996e-05	no	no	no		BAF	5.19e-05	no	no	no		KV9	5.96e-05	no	no	no
PR61B	4.996e-05	no	no	no		NREP	5.189e-05	no	Yes	no		XB	5.96e-05	no	no	no
K35	4.996e-05	no	no	no		C10orf32-ASMT	5.189e-05	no	no	no		RABENOSYN-5	5.96e-05	no	no	no
HDGFRP3	4.996e-05	no	no	no		WDR6	5.188e-05	no	no	no		BCT2	5.959e-05	no	no	no
B7RP-2	4.995e-05	no	no	no		NPTXR	5.188e-05	no	no	no		KLRC4-KLRK1	5.959e-05	no	no	no
PART15	4.994e-05	no	no	no		MKP-1	5.187e-05	no	no	no		M68	5.959e-05	no	no	no
CIR1	4.994e-05	no	no	no		HST19662	5.186e-05	no	no	no		CREB-H	5.959e-05	no	no	no
TULA	4.993e-05	no	no	no		CT61	5.186e-05	no	no	no		ZC3H14	5.959e-05	no	Yes	no
JBTS12	4.993e-05	no	no	no		GRB7	5.184e-05	no	no	no		GADD34	5.959e-05	no	no	no
PP2447	4.991e-05	no	no	no		PCBD	5.183e-05	no	no	no		ZADT	5.958e-05	no	no	no
PALM2-AKAP2	4.991e-05	no	Yes	no		C11ORF15	5.182e-05	no	no	no		PRIM1	5.958e-05	no	no	no
BA234K24	4.99e-05	no	no	no		RSPH10B	5.182e-05	no	no	no		PPP1R53	5.958e-05	no	no	no
FAAP16	4.99e-05	no	no	no		NCM1	5.182e-05	no	no	no		CT23	5.956e-05	no	no	no
NPTXR	4.99e-05	no	no	no		DJ310O13	5.181e-05	no	no	no		FBN3	5.956e-05	no	no	no
FLJ34161	4.99e-05	no	no	no		FLJ23142	5.181e-05	no	no	no		SRML1	5.956e-05	no	no	no
DLL1	4.99e-05	no	no	no		NUP54	5.181e-05	no	no	no		URK	5.955e-05	no	no	no
FLJ00225	4.988e-05	no	no	no		F12	5.181e-05	no	no	no		AWP1	5.955e-05	no	no	no
CD107A	4.988e-05	no	no	no		SNURPORTIN1	5.18e-05	no	no	no		HBRF	5.955e-05	no	no	no
B3T5	4.986e-05	no	no	no		DEFB-29	5.18e-05	no	no	no		P28ING5	5.954e-05	no	no	no
CNOL	4.986e-05	no	no	no		CBC2	5.18e-05	no	no	no		THEG1	5.953e-05	no	no	no
KIAA1135	4.985e-05	no	no	no		PPP1R28	5.179e-05	no	no	no		FLJ13732	5.953e-05	no	no	no
ZETA	4.985e-05	no	no	no		GNAI3	5.179e-05	no	Yes	no		CD159C	5.953e-05	no	no	no
FLJ23259	4.984e-05	no	no	no		ZNF517	5.179e-05	no	no	no		8HS20	5.951e-05	no	no	no
OR10H4	4.984e-05	no	no	no		P150TSP	5.179e-05	no	no	no		MGC50337	5.949e-05	no	no	no
SYCP2	4.983e-05	no	no	no		ZIP7	5.178e-05	no	no	no		TFIIICEPSILON	5.949e-05	no	no	no
P4	4.982e-05	no	no	no		ELG1	5.178e-05	no	no	no		EPABP2	5.948e-05	no	no	no
NBC3	4.982e-05	no	no	no		NM23-H8	5.178e-05	no	no	no		MGC70651	5.946e-05	no	no	no
DNCLI2	4.981e-05	no	no	no		MSTP095	5.178e-05	no	no	no		TREM2C	5.944e-05	no	no	no
VELI2	4.981e-05	no	no	no		DPPII	5.178e-05	no	no	no		KIAA1601	5.944e-05	no	no	no
RP-A	4.981e-05	no	no	no		S17AH	5.178e-05	no	no	no		CD362	5.944e-05	no	no	no
CD325	4.98e-05	no	no	no		RPB3	5.178e-05	no	no	no		PAM14	5.943e-05	no	no	no
FLJ16792	4.98e-05	no	no	no		C6ORF145	5.178e-05	no	no	no		GLUN1	5.943e-05	no	no	no
PATZ2	4.98e-05	no	no	no		MRPL21	5.177e-05	no	no	no		UBC12	5.943e-05	no	no	no
ELA1	4.98e-05	no	no	no		ALDH3A2	5.177e-05	no	Yes	no		C-P4HALPHA(I)	5.943e-05	no	no	no
FLJ32792	4.979e-05	no	no	no		GOLGIN-95	5.175e-05	no	no	no		GPATC8	5.941e-05	no	no	no
ZFYVE17	4.979e-05	no	no	no		ARRDC5	5.175e-05	no	no	no		KAPPA-200	5.941e-05	no	no	no
PPP1R68	4.978e-05	no	no	no		ADAMTS14	5.175e-05	no	no	no		NDPKD	5.939e-05	no	no	no
GPR58	4.978e-05	no	no	no		FLJ20733	5.174e-05	no	no	no		DKFZP434P0316	5.939e-05	no	no	no
EVA	4.977e-05	no	no	no		RP13-531C17	5.173e-05	no	no	no		KIAA0828	5.939e-05	no	no	no
ARFL3	4.977e-05	no	no	no		C6ORF1	5.172e-05	no	no	no		MGC10200	5.938e-05	no	no	no
CHD5	4.977e-05	no	no	no		FREAC4	5.172e-05	no	no	no		FLJ21865	5.938e-05	no	no	no
RPN5	4.975e-05	no	no	no		FLJ35989	5.172e-05	no	no	no		VID24	5.936e-05	no	no	no
CAP3	4.975e-05	no	no	no		BA371L19	5.172e-05	no	no	no		RPN4	5.936e-05	no	no	no
HAS3	4.975e-05	no	no	no		3OST2	5.172e-05	no	no	no		OBGH1	5.935e-05	no	no	no
GK001	4.975e-05	no	no	no		FLJ22588	5.172e-05	no	no	no		PME	5.935e-05	no	no	no
MGC33367	4.975e-05	no	no	no		TXDI1	5.172e-05	no	no	no		KRT1-3	5.935e-05	no	no	no
IBMPFD	4.974e-05	no	no	no		EBRP	5.17e-05	no	no	no		TP53I12	5.935e-05	no	no	no
GLUN1	4.974e-05	no	no	no		NOC2	5.17e-05	no	no	no		ROLT	5.935e-05	no	no	no
C1ORF100	4.974e-05	no	no	no		MGC33190	5.17e-05	no	no	no		FLJ44299	5.934e-05	no	no	no
ENT4	4.973e-05	no	no	no		FLJ14802	5.169e-05	no	no	no		FLJ78302	5.934e-05	no	no	no
HIST3H2BB	4.973e-05	no	no	no		RHOGDI-3	5.169e-05	no	no	no		D5S346	5.934e-05	no	no	no
OAZ1	4.972e-05	no	Yes	no		SNX10	5.169e-05	no	no	no		LPHB	5.934e-05	no	no	no
KLRC4-KLRK1	4.969e-05	no	no	no		ARPIKFYVE	5.168e-05	no	no	no		EPITEMPIN	5.934e-05	no	no	no
HEI10	4.969e-05	no	no	no		MGC30022	5.168e-05	no	no	no		MGC34830	5.931e-05	no	no	no
DJ29K1	4.969e-05	no	no	no		MB1	5.168e-05	no	no	no		NXT1	5.931e-05	no	no	no
DMRTB1	4.969e-05	no	no	no		LPHB	5.168e-05	no	no	no		C9ORF171	5.931e-05	no	no	no
CLU2	4.968e-05	no	no	no		DC44	5.168e-05	no	no	no		SPG8	5.931e-05	no	no	no
GP3ST	4.966e-05	no	no	no		ISC1	5.167e-05	no	no	no		TRAP240	5.93e-05	no	no	no
CPX1	4.965e-05	no	no	no		MGC3165	5.166e-05	no	no	no		RP50	5.93e-05	no	no	no
KIAA0745	4.965e-05	no	no	no		AREC3	5.166e-05	no	no	no		FLJ32704	5.93e-05	no	no	no
GPR14	4.964e-05	no	no	no		P(K)	5.165e-05	no	no	no		HSPC252	5.929e-05	no	no	no
YWHA1	4.964e-05	no	no	no		SRRP37	5.164e-05	no	no	no		ARE1	5.928e-05	no	no	no
C21ORF102	4.963e-05	no	no	no		KIAA0652	5.164e-05	no	no	no		KIAA0252	5.928e-05	no	no	no
CD4	4.962e-05	no	no	no		NET60	5.163e-05	no	no	no		TRDN	5.928e-05	no	Yes	Yes
FPGT-TNNI3K	4.962e-05	no	Yes	no		SDR30C1	5.163e-05	no	no	no		MINT3	5.926e-05	no	no	no
RYA3	4.962e-05	no	no	no		SPG65	5.163e-05	no	no	no		NCBP2-AS2	5.926e-05	no	no	no
AWMS2	4.961e-05	no	no	no		ATP6B	5.163e-05	no	no	no		SRE-ZBP	5.925e-05	no	no	no
MGCRACGAP	4.961e-05	no	no	no		KIAA1030	5.162e-05	no	no	no		FLJ32198	5.925e-05	no	no	no
CMS	4.961e-05	no	no	no		PE2	5.16e-05	no	no	no		C2GNT2	5.924e-05	no	no	no
FLJ90036	4.96e-05	no	no	no		GLOD1	5.16e-05	no	no	no		PLAP1	5.921e-05	no	no	no
VAULT1	4.959e-05	no	no	no		IFT70	5.16e-05	no	no	no		GLYPICAN	5.92e-05	no	no	no
PPAPDC1	4.959e-05	no	no	no		FSAP35	5.159e-05	no	no	no		TDRD14C	5.92e-05	no	no	no
FOXD6	4.958e-05	no	no	no		TAIL1	5.157e-05	no	no	no		P126	5.92e-05	no	no	no
USS2	4.957e-05	no	no	no		ROBPI	5.157e-05	no	no	no		GTX	5.92e-05	no	no	no
OR1I1Q	4.957e-05	no	no	no		ETFR-1	5.156e-05	no	no	no		CALML3	5.92e-05	no	no	no
STT3-A	4.957e-05	no	no	no		RNF87	5.156e-05	no	no	no		FZD2	5.919e-05	no	no	no
WIF1	4.957e-05	no	no	no		MIST	5.156e-05	no	no	no		CSN7A	5.918e-05	no	no	no
SHCB	4.956e-05	no	no	no		Cad	5.155e-05	no	no	no		ERK7	5.918e-05	no	no	no
TPX	4.954e-05	no	no	no		HEMA	5.155e-05	no	no	no		MKLP-1	5.918e-05	no	no	no
PGAM-M	4.954e-05	no	no	no		ODF5	5.155e-05	no	no	no		GOLGA6D	5.918e-05	no	no	no
PRDM12	4.954e-05	no	no	no		5-OPASE	5.155e-05	no	no	no		PPP1R150	5.918e-05	no	no	no
BETA4GAL-T2	4.954e-05	no	no	no		CCP3	5.153e-05	no	no	no		LFG2	5.915e-05	no	no	no
KAP10	4.953e-05	no	no	no		SSAT2	5.153e-05	no	no	no		FLJ35454	5.915e-05	no	no	no
SLRR3A	4.953e-05	no	no	no		ASIP2	5.152e-05	no	no	no		CD4	5.915e-05	no	no	no
FLJ20171	4.951e-05	no	no	no		FECD4	5.151e-05	no	no	no		TPBGL	5.914e-05	no	no	no
ZFGF5	4.951e-05	no	no	no		HOX3C	5.151e-05	no	no	no		MCM1	5.914e-05	no	no	no
ARMD7	4.951e-05	no	no	no		S18	5.15e-05	no	no	no		GAT2	5.914e-05	no	no	no
FLJ10567	4.95e-05	no	no	no		MCP3	5.149e-05	no	no	no		BPIFF	5.913e-05	no	no	no
FLJ14802	4.95e-05	no	no	no		MGC131633	5.149e-05	no	no	no		CHC22	5.911e-05	no	no	no
GPI1	4.949e-05	no	no	no		TSG	5.148e-05	no	no	no		FLJ33930	5.911e-05	no	no	no
FLAME-3	4.949e-05	no	no	no		C20ORF202	5.148e-05	no	no	no		C/EBP-BETA	5.911e-05	no	no	no
SDPII	4.948e-05	no	no	no		MRGD	5.147e-05	no	no	no		CD223	5.911e-05	no	no	no
HRC1	4.946e-05	no	no	no		DAKAR	5.147e-05	no	no	no		FLJ46072	5.91e-05	no	no	no
FLJ40176	4.946e-05	no	no	no		ORM1	5.146e-05	no	no	no		SC1	5.91e-05	no	no	no
BETA3GN-T4	4.945e-05	no	no	no		FLJ00380	5.146e-05	no	no	no		DJ836N17	5.909e-05	no	no	no
PLEIAD	4.945e-05	no	no	no		FAM205CP	5.145e-05	no	no	no		NHE8	5.908e-05	no	no	no
MGC131633	4.943e-05	no	no	no		SOH1	5.144e-05	no	no	no		CEPR	5.904e-05	no	no	no
AGTIL	4.942e-05	no	no	no		C7ORF55-LUC7L2	5.144e-05	no	no	no		NKG2-E	5.904e-05	no	no	no
MEG2	4.941e-05	no	no	no		SDR11E1	5.144e-05	no	no	no		MYLK5	5.904e-05	no	no	no
OGU1	4.941e-05	no	no	no		NF-YC	5.142e-05	no	no	no		GPR35	5.903e-05	no	no	no
FLJ11896	4.939e-05	no	no	no		LIPRIN	5.141e-05	no	no	no		PDLIM5	5.901e-05	Yes	no	no
CKMT1	4.939e-05	no	no	no		RTEF-1	5.141e-05	no	no	no		NCRNA00254	5.901e-05	no	no	no
SPINO	4.939e-05	no	no	no		GP3ST	5.141e-05	no	no	no		NOTUM	5.901e-05	no	no	no
TGT3	4.939e-05	no	no	no		HMIS18ALPHA	5.14e-05	no	no	no		FLJ33655	5.9e-05	no	no	no
CUL1	4.938e-05	no	no	no		FLJ25005	5.14e-05	no	no	no		LOC100287718	5.899e-05	no	no	no
SASS4	4.937e-05	no	no	no		PAQR11	5.14e-05	no	no	no		OPAL1	5.899e-05	no	no	no
SECTM1	4.937e-05	no	no	no		ATFA	5.139e-05	no	no	no		PGMRP	5.899e-05	no	no	no
FLJ10349	4.936e-05	no	no	no		AITD3	5.139e-05	no	no	no		HSBP1	5.899e-05	no	no	no
MGC70651	4.936e-05	no	no	no		COX4-1	5.138e-05	no	no	no		S15	5.898e-05	no	no	no
HST17025	4.936e-05	no	no	no		CPVL	5.138e-05	no	Yes	no		PAPT	5.898e-05	no	no	no
FLJ14611	4.935e-05	no	no	no		GIDE	5.137e-05	no	no	no		MST158	5.898e-05	no	no	no
MAPTIT	4.934e-05	no	no	no		KIAA1941	5.137e-05	no	no	no		PBX1	5.896e-05	no	Yes	Yes
JBTS13	4.934e-05	no	no	no		GLP1R	5.136e-05	no	no	no		C11ORF15	5.896e-05	no	no	no
OR10A4P	4.934e-05	no	no	no		PRED77	5.135e-05	no	no	no		HIGD2BP	5.896e-05	no	no	no
SBBI81	4.934e-05	no	no	no		FLJ37794	5.135e-05	no	no	no		PDCN	5.895e-05	no	no	no
DBC2	4.933e-05	no	no	no		C1ORF226	5.135e-05	no	no	no		DERPC	5.895e-05	no	no	no
CREBL1	4.932e-05	no	no	no		GRG6	5.134e-05	no	no	no		PPP1R157	5.894e-05	no	no	no
MGC17211	4.932e-05	no	no	no		CSDC1	5.133e-05	no	no	no		ZNF911	5.894e-05	no	no	no
SURF1	4.932e-05	no	no	no		MGC2560	5.132e-05	no	no	no		MGC29736	5.891e-05	no	no	no
C6ORF13	4.932e-05	no	no	no		GOLGA6L18	5.13e-05	no	no	no		HNRD2	5.89e-05	no	no	no
KIAA1257	4.931e-05	no	no	no		BM32A	5.13e-05	no	no	no		CSDC1	5.889e-05	no	no	no
DKFZP761L1518	4.93e-05	no	no	no		GTF2H1	5.13e-05	no	no	no		TPABP	5.889e-05	no	no	no
HST19268	4.93e-05	no	no	no		ACSVL4	5.128e-05	no	no	no		DRD1	5.888e-05	no	no	no
SRSF1	4.93e-05	no	Yes	no		FLJ25421	5.128e-05	no	no	no		MRGD	5.886e-05	no	no	no
N143	4.93e-05	no	no	no		KIAA1982	5.128e-05	no	no	no		SMAP-8	5.885e-05	no	no	no
SAP45	4.93e-05	no	no	no		APXL3	5.128e-05	no	no	no		FLJ12732	5.885e-05	no	no	no
FREAC2	4.928e-05	no	no	no		MGC2198	5.127e-05	no	no	no		CYTOHESIN-3	5.885e-05	no	no	no
DKFZP686E2433	4.928e-05	no	no	no		CD266	5.127e-05	no	no	no		FLJ16806	5.884e-05	no	no	no
LRPC21	4.927e-05	no	no	no		DOK-2	5.126e-05	no	no	no		TMEM120B	5.884e-05	no	no	no
SGK494	4.927e-05	no	no	no		PAM14	5.125e-05	no	no	no		HGLE1	5.884e-05	no	no	no
AIRAP	4.927e-05	no	no	no		LIPT2	5.125e-05	no	no	no		F2	5.884e-05	no	no	no
FMT1	4.926e-05	no	no	no		PSDC	5.125e-05	no	no	no		QR1	5.883e-05	no	no	no
FLJ22625	4.925e-05	no	no	no		YCR016W	5.125e-05	no	no	no		FLJ34389	5.883e-05	no	no	no
PS20	4.925e-05	no	no	no		KIAA0247	5.124e-05	no	no	no		RFC36	5.883e-05	no	no	no
UBC12	4.924e-05	no	no	no		HUMZD58C02	5.124e-05	no	no	no		KNO1	5.883e-05	no	no	no
MGC10772	4.923e-05	no	no	no		ANX7	5.123e-05	no	no	no		C8ORF82	5.881e-05	no	no	no
CD349	4.923e-05	no	no	no		ADD1	5.122e-05	no	no	no		DMRTB1	5.88e-05	no	no	no
VPS28	4.923e-05	no	no	no		MGC11352	5.122e-05	no	no	no		H3P	5.88e-05	no	no	no
C10orf62	4.923e-05	no	no	no		TMBIM5	5.121e-05	no	no	no		PEG1	5.88e-05	no	no	no
PIR51	4.923e-05	no	no	no		RESA1	5.121e-05	no	no	no		dNT-1	5.879e-05	no	no	no
ZFP385	4.923e-05	no	no	no		SH120	5.12e-05	no	no	no		TESTICAN-2	5.878e-05	no	no	no
H-B	4.922e-05	no	no	no		BPY1B	5.12e-05	no	no	no		ZNF801	5.878e-05	no	no	no
DSCR1L2	4.922e-05	no	no	no		CGI-128	5.119e-05	no	no	no		CD304	5.878e-05	no	no	no
SELM	4.921e-05	no	no	no		ZNF251	5.119e-05	no	no	no		TRIP5	5.878e-05	no	no	no
BA424I5	4.921e-05	no	no	no		FLJ10036	5.119e-05	no	no	no		KIAA0968	5.876e-05	no	no	no
S23	4.921e-05	no	no	no		IL-20R1	5.119e-05	no	no	no		SPLUNC1	5.875e-05	no	no	no
PPP1R48	4.921e-05	no	no	no		BHMT1	5.118e-05	no	no	no		ARPIKFYVE	5.875e-05	no	no	no
DHRC	4.92e-05	no	no	no		FLJ22519	5.118e-05	no	no	no		P518	5.875e-05	no	no	no
FLJ21918	4.919e-05	no	no	no		NKX4-2	5.117e-05	no	no	no		CAMK2G	5.875e-05	Yes	no	no
NET23	4.919e-05	no	no	no		HEL-127	5.117e-05	no	no	no		KAP1	5.875e-05	no	no	no
ICHYN	4.918e-05	no	no	no		2P1	5.117e-05	no	no	no		MGC33637	5.875e-05	no	no	no
CSN7A	4.917e-05	no	no	no		HUBSPECV	5.116e-05	no	no	no		SEC2	5.874e-05	no	no	no
FRMD2	4.916e-05	no	no	no		ABCD-2	5.116e-05	no	no	no		FOAP-10	5.873e-05	no	no	no
ARIA	4.916e-05	no	no	no		PRELI	5.113e-05	no	no	no		L28	5.873e-05	no	no	no
NAGT	4.915e-05	no	no	no		FLJ41567	5.112e-05	no	no	no		ZSCAN50	5.873e-05	no	no	no
OCM1	4.913e-05	no	no	no		PART17	5.111e-05	no	no	no		MTRNR2L8	5.871e-05	no	no	no
LUZP	4.913e-05	no	no	no		CT82	5.111e-05	no	no	no		USP50	5.87e-05	no	no	no
RENR	4.913e-05	no	no	no		SCC4	5.111e-05	no	no	no		RNU1-67P	5.87e-05	no	Yes	no
MUSER1	4.913e-05	no	no	no		ECGF1	5.111e-05	no	no	no		CAP-H2	5.87e-05	no	no	no
PIF79	4.913e-05	no	no	no		MGC189743	5.111e-05	no	no	no		GALNAC6S	5.87e-05	no	no	no
MGC45562	4.912e-05	no	no	no		FLJ21675	5.107e-05	no	no	no		NKX4-2	5.869e-05	no	no	no
NRAMP1	4.912e-05	no	no	no		BA216L13	5.107e-05	no	no	no		MGC26158	5.868e-05	no	no	no
KIAA0397	4.912e-05	no	no	no		FLJ12582	5.107e-05	no	no	no		VPS2A	5.866e-05	no	no	no
PAR-1C	4.911e-05	no	no	no		KIAA0209	5.107e-05	no	no	no		PHZ-67	5.865e-05	no	no	no
ZSCAN50	4.91e-05	no	no	no		PLK	5.106e-05	no	no	no		PP3856	5.864e-05	no	no	no
FLJ90517	4.91e-05	no	no	no		ISCS	5.106e-05	no	no	no		ECGF1	5.863e-05	no	no	no
DJ551D2	4.909e-05	no	no	no		OR10A4P	5.106e-05	no	no	no		BA444E17	5.863e-05	no	no	no
ZMYND21	4.909e-05	no	no	no		BIMP1	5.106e-05	no	no	no		CLSPN	5.863e-05	no	no	no
GHRF	4.909e-05	no	no	no		RYR3	5.106e-05	no	no	no		U3-55K	5.863e-05	no	no	no
PMSA2	4.909e-05	no	no	no		FLJ20247	5.105e-05	no	no	no		DJ238O23	5.861e-05	no	no	no
FLJ46675	4.908e-05	no	no	no		ECHD	5.104e-05	no	no	no		MGC29949	5.861e-05	no	no	no
CD105	4.906e-05	no	no	no		SNRNP-B	5.103e-05	no	no	no		MGC46315	5.861e-05	no	no	no
KIAA0854	4.906e-05	no	no	no		RXFPR2	5.103e-05	no	no	no		DKFZP547B1713	5.86e-05	no	no	no
MGC111371	4.905e-05	no	no	no		LOC100133251	5.102e-05	no	no	no		FLJ45455	5.86e-05	no	no	no
DRG2	4.905e-05	no	no	no		MGC14139	5.102e-05	no	no	no		SID6-1512	5.86e-05	no	no	no
FLJ16806	4.904e-05	no	no	no		ARHGEF30	5.101e-05	no	no	no		PGR26	5.859e-05	no	no	no
LMF1	4.904e-05	no	Yes	no		HUFI-1	5.101e-05	no	no	no		TST	5.858e-05	no	no	no
IQGAP2	4.903e-05	no	no	no		DJ686C3	5.101e-05	no	no	no		GOLGIN-95	5.856e-05	no	no	no
TAPP1	4.903e-05	no	no	no		AMPH	5.1e-05	no	no	no		YJL124C	5.856e-05	no	no	no
RANBP13	4.902e-05	no	no	no		DGKDELTA	5.1e-05	no	no	no		C3ORF70	5.855e-05	no	no	no
LDHA	4.902e-05	no	no	no		CYP4F11	5.098e-05	no	no	no		MGC111371	5.855e-05	no	no	no
FLJ36666	4.901e-05	no	no	no		FCNM	5.098e-05	no	no	no		GOLGA6C	5.854e-05	no	no	no
CD210	4.901e-05	no	no	no		TGFBR3L	5.098e-05	no	no	no		GIYD1	5.853e-05	no	no	no
DCBLD2	4.901e-05	no	Yes	Yes		ZNF801	5.097e-05	no	no	no		EST122234	5.853e-05	no	no	no
KLP-11	4.901e-05	no	no	no		MGC134949	5.097e-05	no	no	no		C14ORF37	5.851e-05	no	no	no
FLJ13990	4.901e-05	no	no	no		HSC	5.097e-05	no	no	no		L4	5.851e-05	no	no	no
H3	4.901e-05	no	no	no		DKFZP761H0421	5.096e-05	no	no	no		AOAH	5.851e-05	no	no	no
ZFP98	4.899e-05	no	no	no		GPR1	5.096e-05	no	no	no		TUDOR3	5.85e-05	no	no	no
PP2CALPHA	4.898e-05	no	no	no		lnc-DARS2-4	5.096e-05	no	Yes	no		BMP14	5.85e-05	no	no	no
KIAA0551	4.895e-05	no	no	no		GOLIM5	5.096e-05	no	no	no		SHCB	5.848e-05	no	no	no
MGC14381	4.895e-05	no	no	no		HYPC	5.095e-05	no	no	no		SPIN1	5.848e-05	no	Yes	Yes
BHLHE77	4.895e-05	no	no	no		DRD2	5.094e-05	no	no	no		CROC1	5.846e-05	no	no	no
PPP1R126	4.894e-05	no	no	no		HST1361	5.093e-05	no	no	no		EPLIN	5.846e-05	no	no	no
BCL7C	4.894e-05	no	no	no		BTN8	5.092e-05	no	no	no		BCA3	5.846e-05	no	no	no
GEM	4.894e-05	no	no	no		NSMASE2	5.092e-05	no	no	no		SUA5	5.846e-05	no	no	no
bHLHe23	4.893e-05	no	no	no		MP11	5.092e-05	no	no	no		FLJ11838	5.845e-05	no	no	no
RNPEP	4.893e-05	no	no	no		SDR9C1	5.091e-05	no	no	no		CRIK	5.845e-05	no	no	no
FSTL1	4.893e-05	no	Yes	no		KIAA1933	5.09e-05	no	no	no		RNF94	5.844e-05	no	no	no
MXA	4.892e-05	no	no	no		BHLHF42	5.09e-05	no	no	no		C19ORF73	5.843e-05	no	no	no
KAP2	4.892e-05	no	no	no		SRPSOX	5.09e-05	no	no	no		CFIM25	5.841e-05	no	no	no
HSA269537	4.892e-05	no	no	no		C1ORF194	5.089e-05	no	no	no		OATP3A1	5.841e-05	no	no	no
GAL3ST3	4.892e-05	no	no	no		OR17-16	5.089e-05	no	no	no		MGC17791	5.841e-05	no	no	no
CD268	4.891e-05	no	no	no		RALDH3	5.089e-05	no	no	no		PDZD7B	5.84e-05	no	no	no
RPN14	4.891e-05	no	no	no		BCA3	5.089e-05	no	no	no		MGC71958	5.84e-05	no	no	no
KIAA0306	4.891e-05	no	no	no		FLJ21868	5.089e-05	no	no	no		UNC112C	5.84e-05	no	no	no
BA554C12	4.89e-05	no	no	no		CHD5	5.088e-05	no	no	no		FLJ40908	5.839e-05	no	no	no
PPT2	4.889e-05	no	no	no		ERC1	5.088e-05	no	Yes	no		ZCCHC20	5.838e-05	no	no	no
DHC1	4.889e-05	no	no	no		IQGAP2	5.088e-05	no	no	no		KIAA0071	5.838e-05	no	no	no
SRR1L	4.889e-05	no	no	no		FLJ23523	5.088e-05	no	no	no		L40	5.836e-05	no	no	no
OTOSP	4.889e-05	no	no	no		DKFZP761D221	5.088e-05	no	no	no		BRCC36	5.836e-05	no	no	no
Med24	4.888e-05	no	no	no		SFRS8	5.086e-05	no	no	no		C1ORF100	5.836e-05	no	no	no
RNF37	4.886e-05	no	no	no		PRELID3A	5.086e-05	no	no	no		DRD2	5.835e-05	no	no	no
H-YPT3	4.886e-05	no	no	no		FLJ21415	5.085e-05	no	no	no		DJ914P20	5.835e-05	no	no	no
DJ328E19	4.886e-05	no	no	no		PreP	5.085e-05	no	no	no		CLPP	5.835e-05	no	no	no
SBBI31	4.886e-05	no	no	no		RPTPA	5.083e-05	no	no	no		OR7E24Q	5.835e-05	no	no	no
ZNF636	4.886e-05	no	no	no		PHZ-32	5.083e-05	no	no	no		SLRR2C	5.835e-05	no	no	no
PP1ALPHA	4.885e-05	no	no	no		FLJ37528	5.083e-05	no	no	no		TARG1	5.834e-05	no	no	no
FLJ90806	4.885e-05	no	no	no		OST363	5.082e-05	no	no	no		HST19371	5.834e-05	no	no	no
TBCEL	4.885e-05	no	Yes	no		ARL7	5.082e-05	no	no	no		S100P	5.834e-05	no	no	no
SLC37A1	4.884e-05	no	no	no		FLJ46536	5.081e-05	no	no	no		KIAA0381	5.834e-05	no	no	no
NXT1	4.883e-05	no	no	no		IAN7	5.08e-05	no	no	no		CRYBA2	5.833e-05	no	no	no
NF-YC	4.882e-05	no	no	no		HOX3B	5.079e-05	no	no	no		RP53	5.831e-05	no	no	no
P50BP	4.882e-05	no	no	no		HBZ-T1	5.078e-05	no	no	no		FAST	5.83e-05	no	no	no
MEKK13	4.882e-05	no	no	no		CRKL	5.077e-05	no	no	no		FLJ30663	5.83e-05	no	no	no
RH-II/GUB	4.882e-05	no	no	no		DCAF9	5.076e-05	no	no	no		LDHA	5.829e-05	no	no	no
IRE1P	4.88e-05	no	no	no		PCDHY	5.076e-05	no	no	no		ANTI-ELASTASE	5.828e-05	no	no	no
MGC10481	4.879e-05	no	no	no		TTF1	5.076e-05	no	no	no		ABLIM1	5.828e-05	no	Yes	no
CGI-32	4.877e-05	no	no	no		B14	5.075e-05	no	no	no		HUMZD58C02	5.828e-05	no	no	no
RP4-622L5	4.876e-05	no	no	no		TPM1	5.075e-05	Yes	Yes	Yes		EDDM9	5.828e-05	no	no	no
YWHAS	4.875e-05	no	no	no		KELCHL	5.074e-05	no	no	no		DIPA	5.826e-05	no	no	no
YJR010C-A	4.874e-05	no	no	no		COPR5	5.074e-05	no	no	no		FLJ13852	5.826e-05	no	no	no
HA-4	4.874e-05	no	no	no		FACE2	5.073e-05	no	no	no		UNC112B	5.826e-05	no	no	no
LPC2D	4.874e-05	no	no	no		BCX31G15	5.072e-05	no	no	no		PPP1R25	5.825e-05	no	no	no
C14ORF46	4.873e-05	no	no	no		FAM68A	5.071e-05	no	no	no		SECISBP2	5.824e-05	no	no	no
MGC4730	4.873e-05	no	no	no		RNG105	5.071e-05	no	no	no		MID49	5.823e-05	no	no	no
FLJ45455	4.873e-05	no	no	no		TRIM40	5.07e-05	no	no	no		PGR3	5.823e-05	no	no	no
BAF250A	4.873e-05	no	no	no		GPR21	5.069e-05	no	no	no		FBW11	5.821e-05	no	no	no
RSC1A1	4.872e-05	no	no	no		C19ORF73	5.068e-05	no	no	no		VEGFL	5.821e-05	no	no	no
STK37	4.872e-05	no	no	no		LOC100862671	5.068e-05	no	no	no		MAN1	5.818e-05	no	no	no
SDR21C2	4.872e-05	no	no	no		FLJ12634	5.068e-05	no	no	no		ALPHA-MPP	5.816e-05	no	no	no
PEX14	4.872e-05	no	no	no		BA500C11	5.067e-05	no	no	no		FBLN	5.815e-05	no	no	no
GAP-B3	4.872e-05	no	no	no		NY-REN-37	5.067e-05	no	no	no		USP3	5.815e-05	no	no	no
FLJ23878	4.871e-05	no	no	no		FLJ25357	5.065e-05	no	no	no		SDR48A1	5.815e-05	no	no	no
OT-NPI	4.87e-05	no	no	no		PRELID3B	5.065e-05	no	no	no		DLX1	5.815e-05	no	no	no
SPG8	4.87e-05	no	no	no		SWIP1	5.063e-05	no	no	no		COPR5	5.814e-05	no	no	no
BA59I9	4.87e-05	no	no	no		TGT3	5.063e-05	no	no	no		H3	5.813e-05	no	no	no
FLJ39626	4.869e-05	no	no	no		TANGO9	5.063e-05	no	no	no		LOC255275	5.813e-05	no	no	no
GLUN2C	4.869e-05	no	no	no		AQP2L	5.063e-05	no	no	no		MENA	5.811e-05	no	no	no
CH25H	4.868e-05	no	no	no		FAG	5.062e-05	no	no	no		FGF21	5.81e-05	no	no	no
AFI1B	4.867e-05	no	no	no		BA444E17	5.062e-05	no	no	no		PPAPDC1	5.809e-05	no	no	no
HNRPA2B1	4.867e-05	no	no	no		PTPRL10	5.059e-05	no	no	no		SCRA	5.808e-05	no	no	no
SPBC98	4.867e-05	no	no	no		CT52	5.058e-05	no	no	no		RAB37	5.808e-05	no	no	no
FGF21	4.866e-05	no	no	no		MGC117216	5.058e-05	no	no	no		MGC23244	5.808e-05	no	no	no
FLJ11200	4.866e-05	no	no	no		DA59H18	5.058e-05	no	no	no		HSLO-BETA	5.808e-05	no	no	no
LCN9	4.865e-05	no	no	no		OFC7	5.058e-05	no	no	no		UIF	5.806e-05	no	no	no
FLJ90566	4.865e-05	no	no	no		CILD12	5.057e-05	no	no	no		DKFZP761C07121	5.806e-05	no	no	no
L27A	4.864e-05	no	no	no		PDIA16	5.057e-05	no	no	no		CMS	5.805e-05	no	no	no
DJ534B8	4.863e-05	no	no	no		CAP102	5.056e-05	no	no	no		D6S217E	5.804e-05	no	no	no
OAT2	4.863e-05	no	no	no		MBRL	5.055e-05	no	no	no		ANAPC12	5.804e-05	no	no	no
TDT-N	4.862e-05	no	no	no		BA395P17	5.054e-05	no	no	no		NUP54	5.804e-05	no	no	no
ATP6GL	4.862e-05	no	no	no		DKFZP434K046	5.053e-05	no	no	no		PMLP	5.804e-05	no	no	no
ZIP67	4.862e-05	no	no	no		SDPII	5.053e-05	no	no	no		FLJ32828	5.801e-05	no	no	no
FLJ25870	4.862e-05	no	no	no		KIAA0863	5.052e-05	no	no	no		HLA-DQA	5.801e-05	no	no	no
EM:AB023052	4.861e-05	no	no	no		TMEM120B	5.051e-05	no	no	no		C10orf4	5.8e-05	no	no	no
RP50	4.861e-05	no	no	no		SPTRX-3	5.051e-05	no	no	no		OMP85	5.8e-05	no	no	no
NY-REN-37	4.86e-05	no	no	no		OTTHUMG00000020980	5.05e-05	no	no	no		EM:AB023052	5.799e-05	no	no	no
P(K)	4.859e-05	no	no	no		DJ34B21	5.05e-05	no	no	no		lnc-SNRPN-1	5.799e-05	no	Yes	no
BCMP101	4.859e-05	no	no	no		POLN	5.05e-05	no	no	no		SDPII	5.798e-05	no	no	no
SSTR3	4.858e-05	no	no	no		RPL39L1	5.049e-05	no	no	no		PCBD	5.798e-05	no	no	no
NKG2-F	4.858e-05	no	no	no		FLJ20671	5.049e-05	no	no	no		GRSF1	5.798e-05	no	no	no
EOAHA	4.858e-05	no	no	no		FUT12	5.048e-05	no	no	no		BBS19	5.798e-05	no	no	no
MYHC-IIB	4.857e-05	no	no	no		C17ORF29	5.048e-05	no	no	no		DJ366N23	5.796e-05	no	no	no
WNT11	4.857e-05	no	no	no		MYHC-PN	5.048e-05	no	no	no		RHOGDI-3	5.795e-05	no	no	no
HTAK1	4.856e-05	no	no	no		SCAN-1	5.047e-05	no	no	no		CCP3	5.795e-05	no	no	no
WCRF180	4.856e-05	no	no	no		RNA5SP264	5.046e-05	no	Yes	no		OFC7	5.795e-05	no	no	no
RREB1	4.856e-05	no	no	no		DJ794I6	5.046e-05	no	no	no		FLJ20897	5.794e-05	no	no	no
ZNF854	4.855e-05	no	no	no		KIAA1300	5.045e-05	no	no	no		SH3KBP1	5.794e-05	Yes	no	no
MSTP095	4.855e-05	no	no	no		ANKRD9	5.045e-05	no	no	no		CBP6	5.794e-05	no	no	no
ECM2	4.855e-05	no	no	no		MGC26885	5.045e-05	no	no	no		CRY-G-A	5.794e-05	no	no	no
GXVPLA2	4.854e-05	no	no	no		PPP1R144	5.043e-05	no	no	no		DKFZP434N061	5.794e-05	no	no	no
HIGM4	4.853e-05	no	no	no		FLJ25965	5.043e-05	no	no	no		C21ORF78	5.794e-05	no	no	no
DJ1085F17	4.852e-05	no	no	no		RNF21	5.043e-05	no	no	no		FLJ42568	5.794e-05	no	no	no
MEGANE	4.851e-05	no	no	no		DKFZP761A132	5.043e-05	no	no	no		FLJ37464	5.793e-05	no	no	no
LEO1	4.85e-05	no	no	no		MGC23008	5.041e-05	no	no	no		MANSC3	5.793e-05	no	no	no
SECISBP2	4.849e-05	no	no	no		TTC5	5.04e-05	no	no	no		NARR	5.79e-05	no	no	no
SORBS2	4.849e-05	no	Yes	Yes		MUNC13-1	5.04e-05	no	no	no		P325	5.789e-05	no	no	no
LOC728734	4.849e-05	no	no	no		SRCASM	5.039e-05	no	no	no		KCNF2	5.789e-05	no	no	no
LDH6A	4.849e-05	no	no	no		SFRSK1	5.039e-05	no	no	no		TRBF2	5.788e-05	no	no	no
C22ORF4	4.849e-05	no	no	no		A170	5.038e-05	no	no	no		EDDM1	5.788e-05	no	no	no
RNF66	4.848e-05	no	no	no		IP90	5.038e-05	no	no	no		MPZL3	5.786e-05	no	no	no
GST4	4.848e-05	no	no	no		KIAA0693	5.037e-05	no	no	no		NTPDASE-8	5.786e-05	no	no	no
DAPK	4.848e-05	no	no	no		ARID3C	5.037e-05	no	no	no		G1L	5.785e-05	no	no	no
MGC17303	4.847e-05	no	no	no		ERG-3	5.036e-05	no	no	no		RAB26	5.785e-05	no	no	no
C15ORF27	4.847e-05	no	no	no		NTAN1	5.036e-05	no	no	no		SNT3	5.785e-05	no	no	no
KIAA1300	4.846e-05	no	no	no		CYB5-M	5.035e-05	no	no	no		RSPH10B	5.784e-05	no	no	no
MGC42174	4.845e-05	no	no	no		SAPK2	5.035e-05	no	no	no		MGC111222	5.784e-05	no	no	no
MGC2642	4.845e-05	no	no	no		SCLY	5.035e-05	no	no	no		NZF2	5.784e-05	no	no	no
PDA2	4.844e-05	no	no	no		PPP1R96	5.034e-05	no	no	no		SMK-1	5.783e-05	no	no	no
KLS	4.844e-05	no	no	no		MYOP	5.034e-05	no	no	no		YWHAS	5.781e-05	no	no	no
NADHB14	4.844e-05	no	no	no		DKFZP686E10109	5.034e-05	no	no	no		FUBP2	5.78e-05	no	no	no
LEM4	4.843e-05	no	no	no		CACD2	5.033e-05	no	no	no		ZSCAN53	5.78e-05	no	no	no
HHARP	4.843e-05	no	no	no		SGN1	5.033e-05	no	no	no		FLJ23459	5.78e-05	no	no	no
MGC4856	4.843e-05	no	no	no		SUPV3L1	5.032e-05	no	no	no		ML7	5.779e-05	no	no	no
CACN4	4.843e-05	no	no	no		DKFZP434H204	5.032e-05	no	no	no		KIAA1941	5.779e-05	no	no	no
FLJ21415	4.843e-05	no	no	no		MGC22487	5.032e-05	no	no	no		AMZ2	5.779e-05	no	no	no
FLJ10534	4.842e-05	no	no	no		PLZF	5.032e-05	no	no	no		MRPS18-3	5.779e-05	no	no	no
DKFZP313L0121	4.841e-05	no	no	no		MTHFD	5.031e-05	no	no	no		TM7XN1	5.776e-05	no	no	no
O/E-4	4.841e-05	no	no	no		CRY-G-A	5.03e-05	no	no	no		SRSP1	5.776e-05	no	no	no
SNCB	4.841e-05	no	no	no		FLJ23322	5.03e-05	no	no	no		DDX17	5.775e-05	no	Yes	no
ITLN2	4.84e-05	no	no	no		MIR1	5.029e-05	no	no	no		PMCA2	5.774e-05	no	no	no
BHLHC12	4.839e-05	no	no	no		HMUDG	5.029e-05	no	no	no		LRTM2	5.774e-05	no	no	no
HEL-127	4.839e-05	no	no	no		C15ORF26	5.028e-05	no	no	no		WBSCR27	5.774e-05	no	no	no
PreP	4.839e-05	no	no	no		LOC374920	5.027e-05	no	no	no		KA35	5.773e-05	no	no	no
ATG1B	4.838e-05	no	no	no		MGC111373	5.025e-05	no	no	no		PFM1	5.773e-05	no	no	no
CCND3	4.838e-05	no	no	no		CLN10	5.025e-05	no	no	no		FLJ23841	5.773e-05	no	no	no
NET40	4.837e-05	no	no	no		KCNIP2	5.025e-05	Yes	no	no		HIP5	5.771e-05	no	no	no
LINC02197	4.837e-05	no	Yes	no		TDRD14C	5.024e-05	no	no	no		CACD2	5.771e-05	no	no	no
KIP	4.837e-05	no	no	no		DKFZP434K114	5.024e-05	no	no	no		MGC4639	5.77e-05	no	no	no
GPR62	4.836e-05	no	no	no		DJ391O22	5.024e-05	no	no	no		DKFZP761L1518	5.77e-05	no	no	no
RPAC1	4.836e-05	no	no	no		AGTIL	5.023e-05	no	no	no		HST17025	5.77e-05	no	no	no
NAPTB	4.836e-05	no	no	no		21-GARP	5.021e-05	no	no	no		UBPH	5.77e-05	no	no	no
GARG-39	4.836e-05	no	no	no		KIAA1135	5.021e-05	no	no	no		KIAA0888	5.77e-05	no	no	no
FLJ13852	4.835e-05	no	no	no		RDX12	5.019e-05	no	no	no		NPI	5.769e-05	no	no	no
GON-10	4.835e-05	no	no	no		ZO-3	5.018e-05	no	no	no		MSMBBP	5.766e-05	no	no	no
SDR30C1	4.834e-05	no	no	no		SPECC1	5.018e-05	no	Yes	no		MGC29956	5.765e-05	no	no	no
LEAP1	4.834e-05	no	no	no		PCHC1	5.018e-05	no	no	no		C11ORF24	5.765e-05	no	no	no
WAPL	4.833e-05	no	no	no		ERICH1	5.017e-05	no	no	no		STS-1	5.765e-05	no	no	no
GPRV53	4.833e-05	no	no	no		SPLUNC1	5.017e-05	no	no	no		C21ORF57	5.765e-05	no	no	no
CRACD1	4.832e-05	no	no	no		LRRC14A	5.015e-05	no	no	no		SLC25A49	5.764e-05	no	no	no
CLM7	4.831e-05	no	no	no		UMODL1	5.015e-05	no	no	no		UBP41	5.764e-05	no	no	no
TMEM224	4.83e-05	no	no	no		HBQ	5.014e-05	no	no	no		CTAK	5.763e-05	no	no	no
HLA-D0-ALPHA	4.829e-05	no	no	no		RIBA	5.014e-05	no	no	no		PKDREJ	5.763e-05	no	no	no
CD263	4.828e-05	no	no	no		AZ3B	5.014e-05	no	no	no		STE24	5.763e-05	no	no	no
PTGES3L	4.828e-05	no	no	no		DKFZP434M1411	5.013e-05	no	no	no		IL-28A	5.763e-05	no	no	no
FLJ10036	4.828e-05	no	no	no		DJ211D12	5.013e-05	no	no	no		PTP1B	5.763e-05	no	no	no
NF-66	4.827e-05	no	no	no		DYT18	5.013e-05	no	no	no		ISOT	5.763e-05	no	no	no
LNOX2	4.826e-05	no	no	no		PTPSTEP	5.012e-05	no	no	no		SEC34	5.763e-05	no	no	no
UBCH7	4.826e-05	no	no	no		SPINLW1-WFDC6	5.012e-05	no	no	no		MLL1A	5.759e-05	no	no	no
TOP2	4.826e-05	no	no	no		P450SCC	5.012e-05	no	no	no		GPR38	5.759e-05	no	no	no
LOC100996492	4.826e-05	no	no	no		TMEM245	5.011e-05	no	Yes	no		HUNK	5.759e-05	no	no	no
MGC29816	4.825e-05	no	no	no		DKFZP43N024	5.011e-05	no	no	no		CIR1	5.759e-05	no	no	no
KELCHL	4.824e-05	no	no	no		DHC1	5.011e-05	no	no	no		D11S4896E	5.758e-05	no	no	no
DCAF9	4.824e-05	no	no	no		SM-CALP	5.01e-05	no	no	no		CLCI	5.756e-05	no	no	no
FLJ20313	4.823e-05	no	no	no		DYRK2	5.01e-05	no	no	no		NMP4	5.756e-05	no	no	no
KIAA1394	4.823e-05	no	no	no		CTL2	5.01e-05	no	no	no		GATA6	5.756e-05	no	no	no
P126	4.823e-05	no	no	no		HGAA1	5.01e-05	no	no	no		SCA36	5.754e-05	no	no	no
TRIP5	4.822e-05	no	no	no		SMOC2	5.01e-05	no	no	no		SLX2B	5.754e-05	no	no	no
YJL124C	4.822e-05	no	no	no		MGC79399	5.009e-05	no	no	no		FICOLIN-2	5.753e-05	no	no	no
KCNIP4	4.822e-05	no	Yes	no		KIAA0381	5.008e-05	no	no	no		PSMB6I	5.753e-05	no	no	no
RANGNRF	4.821e-05	no	no	no		CD81	5.006e-05	no	Yes	no		P2X2	5.751e-05	no	no	no
ART5	4.821e-05	no	no	no		SWAN-1	5.005e-05	no	no	no		FLJ25287	5.751e-05	no	no	no
MGC15204	4.821e-05	no	no	no		PI3K-C2BETA	5.005e-05	no	no	no		KIAA1135	5.751e-05	no	no	no
CGI-152	4.819e-05	no	no	no		FLJ14981	5.005e-05	no	no	no		FLJ25475	5.751e-05	no	no	no
ALPP	4.819e-05	no	no	no		MGC15204	5.005e-05	no	no	no		MGC14139	5.75e-05	no	no	no
BHLHA6	4.819e-05	no	no	no		LHX6	5.004e-05	no	no	no		DKFZP686L0365	5.75e-05	no	no	no
HKSHIIIC	4.818e-05	no	no	no		FLJ00135	5.002e-05	no	no	no		CD146	5.75e-05	no	no	no
DJ261G23	4.818e-05	no	no	no		FLJ13703	5.002e-05	no	no	no		GPR4	5.749e-05	no	no	no
DKFZP761B039	4.816e-05	no	no	no		TRPC7	5.002e-05	no	no	no		PACE	5.749e-05	no	no	no
ZFYVE5	4.816e-05	no	no	no		DMGDH	5.001e-05	no	no	no		EXOC3L3	5.748e-05	no	no	no
HSPC219	4.816e-05	no	no	no		ENIGMA	5.001e-05	no	no	no		MGC19780	5.748e-05	no	no	no
DORZ1	4.816e-05	no	no	no		PTP-PEST	5e-05	no	no	no		BRMS2	5.748e-05	no	no	no
PTP-PEST	4.815e-05	no	no	no		PANDER	5e-05	no	no	no		CHRNA3	5.746e-05	no	no	no
RFRP	4.815e-05	no	no	no		GNB1	5e-05	no	no	no		FLJ21868	5.746e-05	no	no	no
NG3	4.814e-05	no	no	no		MLTN	5e-05	no	no	no		PPM1L	5.745e-05	no	Yes	no
IRX4	4.813e-05	no	no	no		HERF1	5e-05	no	no	no		HL14	5.744e-05	no	no	no
RACK7	4.813e-05	no	no	no		EHMT1	5e-05	no	Yes	no		C20ORF141	5.743e-05	no	no	no
FLJ12132	4.812e-05	no	no	no		EAB1	4.998e-05	no	no	no		FLJ33600	5.743e-05	no	no	no
TSK	4.812e-05	no	no	no		UNCX4	4.998e-05	no	no	no		PRDM12	5.741e-05	no	no	no
SDR9C1	4.811e-05	no	no	no		FLJ13852	4.995e-05	no	no	no		RAB3IL1	5.741e-05	no	no	no
MGC32056	4.81e-05	no	no	no		MGC14804	4.995e-05	no	no	no		CAR4	5.741e-05	no	no	no
NS4ATP2	4.81e-05	no	no	no		MGC138391	4.995e-05	no	no	no		FALP	5.74e-05	no	no	no
POLN	4.81e-05	no	no	no		ANF	4.995e-05	no	no	no		P150TSP	5.74e-05	no	no	no
CPA	4.809e-05	no	no	no		FLJ25609	4.994e-05	no	no	no		ETMOD	5.74e-05	no	no	no
KAP3	4.809e-05	no	no	no		RAIG-3	4.994e-05	no	no	no		RNF147	5.74e-05	no	no	no
HST1601	4.808e-05	no	no	no		IRX-3	4.994e-05	no	no	no		SPRY4	5.74e-05	no	no	no
UBC1	4.808e-05	no	no	no		POM121A	4.993e-05	no	no	no		VAP-A	5.739e-05	no	no	no
HST17706	4.807e-05	no	no	no		TBE-1	4.993e-05	no	no	no		CSTF-77	5.739e-05	no	no	no
C1ORF194	4.807e-05	no	no	no		LPC2D	4.993e-05	no	no	no		PHZ-32	5.739e-05	no	no	no
PNSP-2	4.806e-05	no	no	no		IPLA2EPSILON	4.993e-05	no	no	no		MGC116789	5.738e-05	no	no	no
PMLP	4.806e-05	no	no	no		MYADM	4.992e-05	no	Yes	Yes		PTD016	5.736e-05	no	no	no
ARVCF	4.806e-05	no	no	no		BHLHE5	4.991e-05	no	no	no		SPATC1L	5.736e-05	no	no	no
ETFR-1	4.806e-05	no	no	no		CAMK2G	4.991e-05	Yes	no	no		FICCA	5.736e-05	no	no	no
RNF84	4.805e-05	no	no	no		PXYLT2	4.991e-05	no	no	no		STARD1	5.733e-05	no	no	no
HSA-MIR-6866	4.805e-05	no	no	no		FLJ33071	4.99e-05	no	no	no		Z3CXXC1	5.731e-05	no	no	no
BMP14	4.803e-05	no	no	no		CT111	4.99e-05	no	no	no		ZMIZ7	5.73e-05	no	no	no
RAL	4.803e-05	no	no	no		TGP	4.99e-05	no	no	no		LQT5	5.729e-05	no	no	no
ERGIC-53L	4.802e-05	no	no	no		FAM228B	4.989e-05	no	no	no		FLJ20898	5.729e-05	no	no	no
SRC3	4.802e-05	no	no	no		SDR9C4	4.989e-05	no	no	no		CD104	5.726e-05	no	no	no
HCA88	4.801e-05	no	no	no		LIP4	4.988e-05	no	no	no		MGC50721	5.726e-05	no	no	no
MGC22916	4.801e-05	no	no	no		TEF4	4.987e-05	no	no	no		TRAAK	5.725e-05	no	no	no
NPTX1	4.8e-05	no	no	no		DMDA2	4.987e-05	no	no	no		D6S114E	5.725e-05	no	no	no
OR17-135	4.8e-05	no	no	no		PBX1	4.986e-05	no	Yes	Yes		NDPKA	5.724e-05	no	no	no
CT32	4.8e-05	no	no	no		RIS	4.985e-05	no	no	no		LOC150383	5.723e-05	no	no	no
TRPC7	4.8e-05	no	no	no		MGC138504	4.985e-05	no	no	no		NS4ATP2	5.723e-05	no	no	no
MKP-1	4.799e-05	no	no	no		UBXDC2	4.984e-05	no	no	no		GARG-39	5.723e-05	no	no	no
FBW11	4.799e-05	no	no	no		KIAA0150	4.984e-05	no	no	no		SIRT6	5.72e-05	no	no	no
PGD	4.798e-05	no	no	no		GLOD3	4.984e-05	no	no	no		LOC100862671	5.72e-05	no	no	no
MGC2695	4.798e-05	no	no	no		LNOX2	4.983e-05	no	no	no		EX33	5.72e-05	no	no	no
CDGIE	4.797e-05	no	no	no		SFMD	4.981e-05	no	no	no		KIAA1933	5.719e-05	no	no	no
UBAP	4.796e-05	no	no	no		MMP-28	4.981e-05	no	no	no		LOC440335	5.719e-05	no	no	no
IFITMD3	4.796e-05	no	no	no		FLJ39737	4.98e-05	no	no	no		FLJ32792	5.718e-05	no	no	no
POTX	4.795e-05	no	no	no		FLJ16806	4.979e-05	no	no	no		RIS	5.718e-05	no	no	no
RNF87	4.795e-05	no	no	no		FLJ40365	4.979e-05	no	no	no		CGI-118	5.718e-05	no	no	no
HPLH2	4.795e-05	no	no	no		CD159A	4.979e-05	no	no	no		GURDB	5.716e-05	no	no	no
KA36	4.795e-05	no	no	no		LOC100287718	4.979e-05	no	no	no		P110D	5.716e-05	no	no	no
FLJ40752	4.794e-05	no	no	no		LOC729020	4.978e-05	no	no	no		PK3	5.716e-05	no	no	no
IAN1	4.794e-05	no	no	no		MGC4267	4.978e-05	no	no	no		DKFZP686E10109	5.715e-05	no	no	no
OASIS	4.794e-05	no	no	no		PP6	4.977e-05	no	no	no		FLJ22588	5.715e-05	no	no	no
CNC1	4.793e-05	no	no	no		AP3D1	4.977e-05	no	Yes	no		KIAA1655	5.714e-05	no	no	no
MURF-3	4.793e-05	no	no	no		BPIFF	4.976e-05	no	no	no		FGF23	5.714e-05	no	no	no
PAC1R	4.793e-05	no	no	no		BSCL	4.976e-05	no	no	no		DJ351K20	5.714e-05	no	no	no
HAND2-AS1	4.791e-05	no	Yes	no		SMP3	4.974e-05	no	no	no		LRRC14A	5.714e-05	no	no	no
KIAA1064	4.791e-05	no	no	no		ALPHA-MPP	4.973e-05	no	no	no		FLJ37611	5.714e-05	no	no	no
HP40	4.791e-05	no	no	no		MGC3251	4.972e-05	no	no	no		WS9-14	5.711e-05	no	no	no
CBC2	4.79e-05	no	no	no		PCAD	4.972e-05	no	no	no		UBP-M	5.711e-05	no	no	no
KIAA0558	4.789e-05	no	no	no		SSB-3	4.972e-05	no	no	no		RE2	5.709e-05	no	no	no
MGC48959	4.789e-05	no	no	no		C14ORF164	4.971e-05	no	no	no		T-PLASTIN	5.709e-05	no	no	no
EPILIGRIN	4.789e-05	no	no	no		DKFZP434N127	4.97e-05	no	no	no		SLC11	5.709e-05	no	no	no
CGI-114	4.788e-05	no	no	no		FLJ25968	4.97e-05	no	no	no		CILD21	5.709e-05	no	no	no
EAB1	4.788e-05	no	no	no		HAPONIN	4.969e-05	no	no	no		KID3	5.706e-05	no	no	no
ELP70	4.788e-05	no	no	no		CES2A1	4.969e-05	no	no	no		PRMT4	5.705e-05	no	no	no
DJ914P20	4.787e-05	no	no	no		BYSL	4.968e-05	no	no	no		MGC19600	5.705e-05	no	no	no
AGIF	4.787e-05	no	no	no		EPS15R	4.966e-05	no	no	no		VWA5C	5.705e-05	no	no	no
CT127	4.786e-05	no	no	no		BCNS	4.966e-05	no	no	no		TBX4	5.704e-05	no	no	no
SKD1B	4.786e-05	no	no	no		UNQ9217	4.965e-05	no	no	no		FREAC4	5.704e-05	no	no	no
INT10	4.786e-05	no	no	no		FLJ31434	4.965e-05	no	no	no		SDR30C1	5.704e-05	no	no	no
TAKL-4	4.785e-05	no	no	no		FOXD6	4.965e-05	no	no	no		LOC728637	5.704e-05	no	no	no
ZNF236	4.785e-05	no	no	no		HTLF	4.965e-05	no	no	no		NET23	5.701e-05	no	no	no
FLJ36128	4.784e-05	no	no	no		ADAM20	4.965e-05	no	no	no		CHOP	5.701e-05	no	no	no
RNF100	4.784e-05	no	no	no		MAN1B	4.964e-05	no	no	no		FLJ31633	5.701e-05	no	no	no
FLJ22435	4.784e-05	no	no	no		ZNF431	4.964e-05	no	Yes	Yes		SURF2	5.701e-05	no	no	no
FLJ21868	4.783e-05	no	no	no		PPP1R128	4.963e-05	no	no	no		UVSSA	5.701e-05	no	no	no
G1L	4.783e-05	no	no	no		EMSY	4.963e-05	no	no	no		RGMa	5.701e-05	no	no	no
DCDC2B	4.783e-05	no	no	no		ADH	4.962e-05	no	no	no		GIL	5.7e-05	no	no	no
CLDN9	4.782e-05	no	no	no		ZAKI-4	4.962e-05	no	no	no		RASA1	5.7e-05	no	Yes	Yes
FCHO2	4.782e-05	no	no	no		RGMa	4.962e-05	no	no	no		TGFA	5.699e-05	no	no	no
CENH3	4.781e-05	no	no	no		FLJ46072	4.962e-05	no	no	no		ECM2	5.699e-05	no	no	no
GALNAC-T6	4.781e-05	no	no	no		MGC9850	4.962e-05	no	no	no		MEAF3	5.699e-05	no	no	no
lnc-SLC25A37-3	4.781e-05	no	Yes	no		FLJ25765	4.962e-05	no	no	no		PTGES3L-AARSD1	5.698e-05	no	no	no
BA444E17	4.78e-05	no	no	no		SULF-1	4.961e-05	no	no	no		MYEOV2	5.698e-05	no	no	no
MGC71958	4.779e-05	no	no	no		SDR4E1	4.961e-05	no	no	no		GOLGA8Q	5.698e-05	no	no	no
CD300D	4.779e-05	no	no	no		PDIA9	4.96e-05	no	no	no		LEM4	5.698e-05	no	no	no
PTPH1	4.779e-05	no	no	no		CD168	4.96e-05	no	no	no		HN1A	5.696e-05	no	no	no
[truncated: 16,390 more rows]
