# Supplementary material for: Systematic identification of interchromosomal interaction networks supports the existence of specialized RNA factories
Source: HighWire-hosted journal article supplement (doi:10.1101/gr.278327.123), 2024-09-25
Supplement: Supplemental_Table_S4.xlsx [file Supplemental_Table_S4.xlsx]

## Sheet: Table S4
Supplementary Table 4: DBPs-based cliques
DBP ID	ENCODE ID	DBP seeded subnetwork weight	Matched random subnetwork weight	Corrected p-value	IDP score
RFX5	ENCFF601WHE	1613.68	873.203	6.77e-165	0.403
SREBF2	ENCFF896MPE	1609.22	632.018	6.77e-165	0.186
E4F1	ENCFF855PXT	1509.78	703.901	6.77e-165	0.472
SIX5	ENCFF878FBM	1338.33	643.339	6.77e-165	0.073
MLLT1	ENCFF652GOE	1309.42	469.687	6.77e-165	0.423
FOS	ENCFF571DGT	1298.6	434.885	6.77e-165	0.127
E2F4	ENCFF744QAC	1241.34	514.059	6.77e-165	0.153
ZBTB11	ENCFF083GTV	1203.42	510.96	6.77e-165	0.035
ZBED1	ENCFF753UAX	1181.33	505.008	6.77e-165	0.183
SMAD5	ENCFF485GWN	1141.38	595.852	6.77e-165	0.186
NFIC	ENCFF980SDE	1053.34	522.008	6.77e-165	0.119
ZBTB4	ENCFF880BEK	1039.28	562.896	6.77e-165	0.269
YBX1	ENCFF488IGF	1027.99	620.157	6.77e-165	0.357
BCL3	ENCFF452NTN	1020.77	426.546	6.77e-165	0.164
TBP	ENCFF099PYR	929.547	450.422	6.77e-165	0.208
RELA	ENCFF141SMI	1148.08	825.294	5.44e-164	0.287
NFXL1	ENCFF057NHJ	1103.29	797.476	5.85e-164	0.241
CTCF	ENCFF796WRU	1482.27	985.999	2.33e-163	0.217
HSF1	ENCFF663ODL	1254.67	928.684	3.81e-162	0.29
NR2F1	ENCFF118UKC	1370.95	737.519	2.87e-158	0.422
ETV6	ENCFF342QUN	1228.61	783.989	9.55e-158	0.09
RXRA	ENCFF063KLF	1287.53	929.492	2.42e-156	0.286
TRIM22	ENCFF796RRA	1235.8	830.175	3.98e-155	0.251
CEBPB	ENCFF955YFB	948.204	666.711	5.31e-151	0.183
STAT3	ENCFF029PAA	958.484	546.656	9.54e-148	0.111
ZNF217	ENCFF131ALE	1027.95	624.278	1.1e-147	0.088
IRF3	ENCFF887WLX	1484.58	729.511	6.37e-146	0.364
ZZZ3	ENCFF535WUH	1022.16	779.424	8.82e-137	0.334
IKZF2	ENCFF511HZB	1614.86	984.646	3.79e-134	0.259
MEF2B	ENCFF884QQW	1295.58	749.592	2.71e-132	0.228
GATAD2B	ENCFF963DVH	1286.95	787.784	2.67e-125	0.189
REST	ENCFF262MRD	1458.56	1077.92	2.08e-121	0.184
SMAD1	ENCFF033MGN	1177.23	918.448	2.61e-120	0.123
PKNOX1	ENCFF946JFA	1783.05	1332.24	1.08e-119	0.369
GABPA	ENCFF093KLR	1130.23	761.496	1.31e-117	0.121
IRF4	ENCFF113VGD	1054.45	813.352	1.32e-115	0.152
ELK1	ENCFF164MPE	1605.84	1147.06	1.49e-113	0.213
EGR1	ENCFF637UJN	1738.97	1061.75	6.6e-113	0.059
MEF2A	ENCFF826GQU	1149.45	909.492	3.96e-103	0.392
TCF3	ENCFF700TAS	1219.74	971.729	4.93e-96	0.434
STAT1	ENCFF896SEI	1368.35	982.166	9.66e-93	0.183
EP300	ENCFF707DWY	1532.61	1210.23	7.2e-88	0.162
ELF1	ENCFF479HJF	1265.68	943.561	6.69e-82	0.209
BATF	ENCFF728KFD	919.379	780.523	3.91e-81	0.117
NFYA	ENCFF937QTP	1170.69	909.735	2.27e-72	0.117
PAX8	ENCFF934NVD	930.518	653.42	5.1e-72	0.028
RELB	ENCFF968MBN	854.866	672.233	5.22e-55	0.198
MAX	ENCFF361EVH	1793.81	1508.86	1.13e-54	0.009
PAX5	ENCFF827VVQ	1818.64	1368.38	3.25e-54	0.277
BCL11A	ENCFF824QXX	937.702	783.9	1.01e-41	0.13
MAZ	ENCFF467VSF	1375.82	954.41	1.69e-36	0.179
ZNF384	ENCFF955FRU	919.335	781.768	1.31e-34	0.101
USF2	ENCFF196JQW	1201.29	870.184	7.43e-28	0.25
RUNX3	ENCFF346JDW	1139.86	828.27	2.38e-15	0.225
IKZF1	ENCFF448JWW	1789.61	1656.01	9.31e-10	0.276
ZBTB40	ENCFF171FMR	1488.69	938.146	2.37e-09	0.265
SKIL	ENCFF506SOD	1145.48	1045.43	6.65e-08	0.085
TCF12	ENCFF154RAJ	1174.84	1091.28	0.037264	0.384
ARNT	ENCFF596RIT	861.2	802.283	0.0564493	0.174
MYC	ENCFF214XPD	1733	1757.21	1	0.351
BCLAF1	ENCFF055QPX	1657.01	1981.23	1	0.241
ATF3	ENCFF882AEU	1571.18	1928.21	1	0.381
NKRF	ENCFF862GDZ	1540.94	1789.95	1	0.109
ATF2	ENCFF213LSA	1511.36	1537.5	1	0.173
PBX3	ENCFF402DQD	1496.76	1685.68	1	0.308
JUND	ENCFF023QWA	1434.01	1781.97	1	0.321
ZBTB33	ENCFF917XFN	1419.53	1420.09	1	0.286
KLF5	ENCFF992IBT	1419.19	1342.96	1	0.149
NRF1	ENCFF864EBU	1365.29	1810.8	1	0.091
IRF5	ENCFF478SRO	1360.34	2201.57	1	0.219
CREB1	ENCFF053UZX	1351.1	1838.35	1	0.23
USF1	ENCFF879TPT	1346.98	1726.21	1	0.089
ZEB1	ENCFF703XCL	1346.57	1779.04	1	0.315
MAFK	ENCFF436SJS	1342.02	1457.65	1	0.259
MXI1	ENCFF376AEL	1313.22	1689.85	1	0.218
BHLHE40	ENCFF445XYV	1302.55	1549.69	1	0.003
ETS1	ENCFF568AZT	1300.04	1806.08	1	0.155
UBTF	ENCFF014PHS	1280.81	1309.08	1	0.097
ARID3A	ENCFF531CLQ	1278.06	1501.81	1	0.159
CEBPZ	ENCFF639KLW	1270.6	1637.82	1	0.092
CREM	ENCFF294IGP	1270.26	1899.12	1	0.088
BACH1	ENCFF631RZH	1251.95	1819.28	1	0.143
SREBF1	ENCFF397YRO	1179.86	1354.22	1	0.126
BMI1	ENCFF160PIE	1174.25	1496.25	1	0.087
PRDM15	ENCFF157HQD	1174.23	1349.64	1	0.066
CUX1	ENCFF451AII	1170.11	1384.11	1	0.245
NFYB	ENCFF156MUM	1166.75	1418.63	1	0.187
NR2C2	ENCFF782KRV	1162.86	1534.99	1	0.173
ZSCAN29	ENCFF828NYA	1149.9	1431.22	1	0.31
ZNF592	ENCFF510ZBJ	1121.84	1231.13	1	0.025
SP1	ENCFF038AVV	1119.57	1316.19	1	0.25
NR2C1	ENCFF626EEU	1107.05	1247.06	1	0.3
TBX21	ENCFF170IZO	1102.8	1174.14	1	0.175
POU2F2	ENCFF934JFA	1093.51	1675.83	1	0.267
ESRRA	ENCFF660PIB	1055.93	1418.84	1	0.208
CBFB	ENCFF876CUT	1053.97	1208.04	1	0.168
FOXK2	ENCFF639XYN	1036.88	1176.52	1	0.236
MEF2C	ENCFF238UKB	1023.72	1058.97	1	0.102
STAT5A	ENCFF006GSY	1016.38	1631.97	1	0.041
RCOR1	ENCFF585BRC	1012.23	1358.87	1	0.33
ZNF687	ENCFF734BGL	1010.4	1399.22	1	0.198
ZNF143	ENCFF012FCL	1004.39	1016.29	1	0.153
ZNF24	ENCFF664TYB	993.49	1350.87	1	0.034
E2F8	ENCFF961ZFW	991.808	1231.31	1	0.08
NFATC3	ENCFF002XEC	951.516	1419.18	1	0.336
SRF	ENCFF114CWH	943.301	861.126	1	0.226
YY1	ENCFF446ZSX	921.828	1126.96	1	0.164
NFATC1	ENCFF172KBM	907.226	1107.79	1	0.214
TCF7	ENCFF900GTF	893.858	1030.71	1	0.002
EBF1	ENCFF895MHN	826.2	1255.54	1	0.373
