# Supplementary material for: Systematic identification of interchromosomal interaction networks supports the existence of specialized RNA factories
Source: HighWire-hosted journal article supplement (doi:10.1101/gr.278327.123), 2024-09-25
Supplement: Supplemental_Table_S5.xlsx [file Supplemental_Table_S5.xlsx]

## Sheet: Table S5
Supplementary Table 5: RBP-based cliques p-values
RBP ID	ENCODE ID	RBP seeded subnetwork weight	Matched random subnetwork weight	Corrected p-value
PRPF8	ENCFF996MYF	1212.63	69.0139	1.15574e-163
ZRANB2	ENCFF578TMK	178.966	62.4434	1.15574e-163
RPS11	ENCFF650CMA	721.013	262.596	3.78513e-124
WRN	ENCFF556SMF	283.864	246.858	1.31172e-118
TARDBP	ENCFF606RXB	220.013	155.957	1.62122e-88
EXOSC10	ENCFF663WYH	343.998	240.435	8.84086e-59
UTP3	ENCFF484NSW	71.3058	52.9759	3.77258e-40
CPEB4	ENCFF370BLG	78.9393	50.3899	8.29131e-32
RPS6	ENCFF260ZOK	87.7891	56.526	5.78311e-28
BUD13	ENCFF807GJE	346.541	199.874	8.53177e-23
AARS	ENCFF684FVK	53.2537	39.1795	1.59699e-11
AKAP8L	ENCFF091OYS	35.9591	26.9695	1.872e-06
DGCR8	ENCFF141IID	39.4067	25.5745	0.000179416
PUS1	ENCFF904FWY	133.2	111.961	0.334911
METAP2	ENCFF962CKJ	49.7689	36.3994	0.608552
HNRNPC	ENCFF526OQL	478.035	703.229	1
EIF3G	ENCFF388GZP	416.696	488.555	1
HNRNPM	ENCFF327FBF	309.754	409.004	1
SBDS	ENCFF384NHH	302.212	340.209	1
DDX42	ENCFF981ZPT	298.36	423.191	1
APEX1	ENCFF283WLS	160.043	197.625	1
PTBP1	ENCFF894KLP	135.536	175.516	1
TROVE2	ENCFF507IRG	131.643	144.814	1
MORC2	ENCFF605AFN	127.281	110.594	1
PCBP1	ENCFF766DUS	126.388	148.193	1
ILF3	ENCFF623LPT	122.075	115.778	1
NPM1	ENCFF177GMP	121.005	134.236	1
RPS10	ENCFF723JLS	119.269	152.315	1
FUS	ENCFF443KJS	114.817	1400.4	1
SRSF7	ENCFF986KGV	110.697	85.3697	1
XRN2	ENCFF371PMP	109.525	87.6624	1
SAFB2	ENCFF893FMD	103.234	125.204	1
XRCC6	ENCFF293KBS	102.957	166.488	1
EIF4E	ENCFF897MSA	100.45	90.1609	1
SRSF9	ENCFF781BNS	99.9374	119.223	1
QKI	ENCFF190XSX	96.7567	114.939	1
RYBP	ENCFF312VDN	94.2982	90.6317	1
CPSF6	ENCFF802BJP	94.1955	149.491	1
PPIL4	ENCFF220VDV	93.6933	82.7328	1
DDX3X	ENCFF901BYH	92.9449	134.298	1
TRA2A	ENCFF402AIE	91.0879	95.4031	1
NIPBL	ENCFF563ZUY	89.7037	95.8235	1
RBFOX2	ENCFF910WLP	87.9779	126.774	1
GNL3	ENCFF331KTS	86.9567	99.5583	1
KHSRP	ENCFF374XQF	86.1193	120.261	1
AGGF1	ENCFF637HZJ	86.0814	89.8742	1
FTO	ENCFF507ZJR	84.6715	99.6815	1
DHX30	ENCFF803KPC	84.321	67.7183	1
ELAC2	ENCFF850ZSC	84.2817	102.574	1
SSB	ENCFF203AWR	83.5206	731.393	1
MATR3	ENCFF558RNJ	82.2335	82.7832	1
SND1	ENCFF341KSL	79.4439	108.78	1
TAF15	ENCFF409DPS	78.8175	88.1678	1
PUM2	ENCFF141SVY	78.0922	78.6626	1
SAFB	ENCFF067WCL	77.1851	86.3679	1
HNRNPA1	ENCFF100JBV	76.2776	107.105	1
UCHL5	ENCFF660XGG	75.8654	63.6464	1
DDX47	ENCFF252CWU	74.9519	61.0633	1
LARP4	ENCFF986MGC	74.847	89.6084	1
DDX6	ENCFF608UGQ	72.0934	82.2985	1
EIF4G2	ENCFF920LSC	71.9174	102.664	1
KHDRBS1	ENCFF214SWT	71.2417	113.151	1
DDX52	ENCFF121SHB	71.1594	64.213	1
SLTM	ENCFF125YXW	71.044	54.0737	1
RNF187	ENCFF389PHE	70.6126	90.9404	1
SF3B1	ENCFF724XML	70.355	63.5588	1
GTF2F1	ENCFF710NXQ	69.802	101.898	1
DDX1	ENCFF007VPS	69.728	98.893	1
GARS	ENCFF390NMJ	68.9296	57.7137	1
ELAVL1	ENCFF566LNK	68.8634	101.2	1
HNRNPL	ENCFF401YRZ	67.7035	104.929	1
GPKOW	ENCFF040AJT	66.5745	85.5777	1
MBNL1	ENCFF603WDI	63.7511	68.9816	1
WDR43	ENCFF545IBP	63.4374	60.1163	1
LIN28B	ENCFF400LMM	63.1034	61.8118	1
WDR3	ENCFF093FTO	62.8906	64.332	1
SRSF1	ENCFF205JTY	62.8107	54.1393	1
DDX21	ENCFF005ZCI	62.6172	71.4268	1
FAM120A	ENCFF016RWW	62.5154	83.6276	1
FXR1	ENCFF704PUC	62.1734	66.5011	1
METTL1	ENCFF125IDN	61.1415	55.0216	1
ZC3H11A	ENCFF421XUC	60.8279	63.7971	1
UPF1	ENCFF707BGL	59.2601	60.1545	1
AATF	ENCFF931DET	58.6381	114.603	1
FASTKD2	ENCFF718VRE	58.6272	70.2192	1
GRWD1	ENCFF282VMI	58.6041	88.7939	1
HNRNPK	ENCFF824IDO	58.3582	78.0989	1
HLTF	ENCFF114YWP	57.5099	81.8626	1
TBRG4	ENCFF734UNZ	57.0433	86.182	1
YWHAG	ENCFF741UNZ	56.5156	52.3879	1
LSM11	ENCFF760VJY	56.2888	47.1313	1
GEMIN5	ENCFF182RWR	54.4748	63.4185	1
RPS3	ENCFF487EXG	54.4321	40.4592	1
PHF6	ENCFF957JDY	54.3842	151.724	1
MTPAP	ENCFF436FUS	54.3572	57.9684	1
HNRNPU	ENCFF408HQB	54.3225	77.4765	1
RBM15	ENCFF006CBO	53.9035	69.5865	1
EWSR1	ENCFF998MNV	53.5207	50.0801	1
CSTF2T	ENCFF647ZVB	53.3041	55.6641	1
UTP18	ENCFF353ULN	53.198	59.5616	1
ZNF622	ENCFF389TCM	52.6703	59.8733	1
NCBP2	ENCFF262QZT	52.319	45.9102	1
NOLC1	ENCFF193VAQ	50.9825	67.3097	1
SERBP1	ENCFF787NKL	49.9453	55.343	1
IGF2BP1	ENCFF853FGC	48.7993	59	1
FMR1	ENCFF630KXK	48.3793	66.7681	1
CBX5	ENCFF855PXT	48.3725	47.5325	1
DDX24	ENCFF142OCF	48.1193	63.894	1
SUPV3L1	ENCFF712HCB	47.3584	235.74	1
EXOSC5	ENCFF532CWB	47.0428	39.4404	1
HNRNPUL1	ENCFF933LJZ	46.8914	55.0579	1
AQR	ENCFF620JUD	46.5985	1672.99	1
ADAT1	ENCFF768WOD	45.6749	58.4714	1
AKAP1	ENCFF010IOJ	45.3197	54.5048	1
SLBP	ENCFF127WAK	45.0532	53.958	1
PABPC4	ENCFF787HQF	44.7171	226.044	1
FXR2	ENCFF237PCI	43.5083	63.0054	1
NSUN2	ENCFF062YKQ	43.307	36.6642	1
DROSHA	ENCFF314RBZ	41.9391	37.641	1
LARP7	ENCFF960ILE	41.2038	54.7982	1
IGF2BP2	ENCFF988HSD	40.9985	48.7015	1
SF3B4	ENCFF788PZS	40.6912	44.7761	1
DDX43	ENCFF520QYX	40.4811	50.6117	1
YBX3	ENCFF210TQC	39.1094	42.2142	1
ZNF800	ENCFF672MYG	37.9468	315.878	1
SMNDC1	ENCFF723GHJ	36.866	36.7203	1
PUM1	ENCFF022IWU	36.5358	269.953	1
TIA1	ENCFF674TKN	35.6009	25.4451	1
SDAD1	ENCFF169ZAH	35.281	69.2629	1
ABCF1	ENCFF300YSV	34.9772	49.8406	1
U2AF1	ENCFF362XUO	34.7604	34.731	1
DDX51	ENCFF965UZI	34.5748	90.2946	1
EFTUD2	ENCFF092TPS	31.9244	27.7302	1
ZC3H8	ENCFF725VLW	31.6916	46.0348	1
U2AF2	ENCFF405ETO	31.4035	26.375	1
DDX55	ENCFF411WKH	31.0478	46.4488	1
EEF2	ENCFF781RUK	30.7342	37.1649	1
APOBEC3C	ENCFF273IBF	28.1388	138.959	1
NONO	ENCFF060IHO	25.4972	32.6318	1
