# Supplementary material for: Systematic identification of interchromosomal interaction networks supports the existence of specialized RNA factories
Source: HighWire-hosted journal article supplement (doi:10.1101/gr.278327.123), 2024-09-25
Supplement: Supplemental_Table_S6.xlsx [file Supplemental_Table_S6.xlsx]

## Sheet: Table S6
Supplementary Table 6: Quantification of intra- versus inter-chromosomal space
		Possible contact pairs
Organism	Resolution	cis	trans	Ratio trans/cis	% of trans/all
P. falciparum	100 kb	115982	1249994	10.7775	0.915092
P. falciparum	1 Mb	1263	13196	10.4481	0.91265
M. musculus	100 kb	9416572	176476201	18.741	0.949344
M. musculus	1 Mb	95469	1778007	18.6239	0.949042
H. sapiens	100 kb	11870922	226746610	19.101	0.950251
H. sapiens	1 Mb	120241	2286135	19.0129	0.950032
