# Supplementary material for: Systematic identification of interchromosomal interaction networks supports the existence of specialized RNA factories
Source: HighWire-hosted journal article supplement (doi:10.1101/gr.278327.123), 2024-09-25
Supplement: Supplemental_Table_S7.xlsx [file Supplemental_Table_S7.xlsx]

## Sheet: Table S7
Supplementary Table 7: Statistics of the Hi-C datasets analyzed in the study
Dataset	Total reads	cis reads	trans reads	Ratio cis/trans	Empty trans bins	Average reads per trans bin
P. falciparum trophozoite	19959910	14769180	5190730	2.8453	0.26	5.6
mOSN	1202229560	766118101	436111459	1.7567	0.08	6.8
late CM	3015334193	2204522171	810812022	2.71891	0.23	4.7
GM12878	14957608148	11299778512	3657829636	3.0892	0.12	16.3
K562	1671088663	1309554520	361534143	3.62222	0.41	2.8
